# Supplementary material
Source: publisher figshare collection journal article supplement (https://acs.figshare.com/ndownloader/files/24365983)
Supplement: Supplementary file 1 [file 24365983]

## Sheet: Sheet1
Table S4. Skin proteins identified from the unaffected area (upper arm) of patients.
Accession	Description	ΣCoverage	Σ# Proteins	Σ# Unique Peptides	Σ# Peptides	Σ# PSMs	Score A2	Coverage A2	# Peptides A2	# PSM A2	Score B2	Coverage B2	# Peptides B2	# PSM B2	Score C2	Coverage C2	# Peptides C2	# PSM C2	# AAs	MW [kDa]	calc. pI
P05109	Protein S100-A8 OS=Homo sapiens GN=S100A8 PE=1 SV=1 - [S10A8_HUMAN]	97.85	1	3	10	46	8.04689	60.22	7	19	7.84517	83.87	8	14	7.82359	46.24	5	13	93	10.8276	7.03467
	Sequence	# PSMs	# Proteins	# Protein Groups	Protein Group Accessions	Modifications	MH+ [Da]	q-Value	PEP	A2	XCorr A2	Probability A2	B2	XCorr B2	Probability B2	C2	XCorr C2	Probability C2	# Missed Cleavages
	LLETECPQYIR	4	1	1	P05109	C6(Carbamidomethyl)	1421.71	0	4.92428e-06	High	3.23263	0	High	3.01261	0	High	2.9622	0	0
	ALNSIIDVYHK	7	1	1	P05109		1272.69	0	0.000214152	High	2.60523	0	High	2.61829	0	High	2.52296	0	0
	GNFHAVYR	1	1	1	P05109		963.479	0.004616	0.20007	High	1.42166	0							0
	MLTELEKALNSIIDVYHKYSLIK	10	1	1	P05109	K7(Glycation); K18(Glycation); Y19(Nitro)	3090.57	0.689263	1	Low	2.20902	0	Low	1.77839	0	Low	2.33843	0	2
	KSHEESHKE	6	1	1	P05109	H3(HNE); K8(Glycation)	1428.69			Low	1.28718	0	Low	1.33551	0	Low	1.5317	0	2
	SHEESHKE	9	1	1	P05109	H2(HNE); K7(Glycation)	1300.6			Low	1.15628	0	Low	1.04533	0	Low	1.08098	0	1
	DDLKK	3	1	1	P05109	K4(HNE); K5(ONE)	928.568			Low	0.574965	0							1
	ELDINTDGAVNFQEFLILVIKMGVAAHK	1	1	1	P05109	K21(Glycation); H27(ONE); K28(Glycation)	3563.87						Low	1.88054	0				1
	MGVAAHKKSHEESHK	2	1	1	P05109	K8(Glycation); H10(HNE)	1993.98						Low	1.75903	0				2
	KSHEESHKE	2	1	1	P05109	H7(HNE)	1266.62						Low	1.278	0				2
	GADVWFK	1	1	1	P05109	K7(HNE)	978.526						Low	0.86203	0				0
O43790	Keratin, type II cuticular Hb6 OS=Homo sapiens GN=KRT86 PE=1 SV=1 - [KRT86_HUMAN]	91.36	10	20	52	206	150.942	82.72	41	64	161.198	76.34	40	65	173.451	81.28	45	77	486	53.4663	5.65576
	Sequence	# PSMs	# Proteins	# Protein Groups	Protein Group Accessions	Modifications	MH+ [Da]	q-Value	PEP	A2	XCorr A2	Probability A2	B2	XCorr B2	Probability B2	C2	XCorr C2	Probability C2	# Missed Cleavages
	SGGVCGPSPPCITTVSVNESLLTPLNLEIDPNAQCVK	5	4	2	P78386;O43790	C5(Carbamidomethyl); C11(Carbamidomethyl); C35(Carbamidomethyl)	3923.92	0	0.00639938	High	6.45796	0	High	4.65754	0	High	4.62979	0	0
	KSDLEANVEALIQEIDFLR	11	3	1	O43790		2203.16	0	2.0735e-11	High	6.39917	0	High	6.12526	0	High	6.18862	0	1
	LEAAVAQSEQQGEAALSDAR	7	4	1	O43790		2044	0	8.99936e-10	High	5.93343	0	High	5.65783	0	High	5.42949	0	0
	ECCQSNLEPLFEGYIETLR	4	2	1	O43790	C2(Carbamidomethyl); C3(Carbamidomethyl)	2358.07	0	1.96982e-08	High	5.38846	0	High	5.11704	0	High	5.66663	0	0
	LASELNHVQEVLEGYK	7	5	2	P78386;O43790		1828.94	0	6.49877e-11	High	4.92175	0	High	5.28388	0	High	5.17101	0	0
	GGVVCGDLCASTTAPVVSTR	3	1	1	O43790	C5(Carbamidomethyl); C9(Carbamidomethyl)	2006.96	0	5.4324e-10	High	4.70321	0	High	5.94609	0	High	5.39125	0	0
	VLQSHISDTSVVVK	6	2	1	O43790		1511.84	0	3.34358e-06	High	4.64462	0	High	4.71836	0	High	4.42415	0	0
	GLTGGFGSHSVCGGFR	4	3	1	O43790	C12(Carbamidomethyl)	1595.74	0	3.69992e-08	High	4.33272	0	High	4.20733	0	High	4.1254	0	0
	LCEGVGSVNVCVSSSR	4	2	2	P78386;O43790	C2(Carbamidomethyl); C11(Carbamidomethyl)	1709.79	0	0.00168116	High	4.1994	0	High	4.52592	0	High	4.38484	0	0
	VSSVPSNSNVVVGTTNACAPSAR	1	1	1	O43790	C18(Carbamidomethyl)	2274.12	0	0.0168796	High	4.09753	0							0
	KSDLEANVEALIQEIDFLRR	6	3	1	O43790		2359.26	0	9.37228e-12	High	3.85711	0	High	4.12866	0	High	4.00353	0	2
	TKEEINELNR	6	5	2	P78386;O43790		1245.64	0	0.0315339	High	3.61776	0	High	3.84441	0	High	3.76296	0	1
	LAELEGALQK	3	5	2	P78386;O43790		1071.6	0	0.000165289	High	3.48635	0	High	3.61799	0	High	3.53835	0	0
	ATAENEFVALKK	6	4	1	O43790		1320.72	0	0.000132508	High	3.43542	0	High	3.33096	0	High	2.99078	0	1
	LGLDIEIATYR	21	6	3	Q9NSB4;P78386;O43790		1263.69	0	0.00590555	High	3.01048	0	High	3.20033	0	Low	2.08927	0	0
	ECCQSNLEPLFEGYIETLRR	4	2	1	O43790	C2(Carbamidomethyl); C3(Carbamidomethyl)	2514.18	0	1.9385e-05	High	2.94009	0	High	2.78186	0	High	2.42305	0	1
	DLNMDCIIAEIK	5	3	2	P78386;O43790	C6(Carbamidomethyl)	1434.7	0	4.31587e-07	High	2.84642	0	High	3.38593	0	High	2.97116	0	0
	CCITAAPYR	3	3	1	O43790	C1(Carbamidomethyl); C2(Carbamidomethyl)	1111.5	0	0.0178717	High	2.82724	0	High	2.978	0	High	2.54222	0	0
	KYEEEVSLR	7	2	1	O43790		1152.59	0	0.000294186	High	2.61223	0	High	2.63512	0	High	2.78195	0	1
	AKQDMACLIR	3	4	1	O43790	C7(Carbamidomethyl)	1205.61	0	0.00144268	High	2.49933	0	High	2.72717	0	High	2.73613	0	1
	VGVCGGSCK	3	1	1	O43790	C4(Carbamidomethyl); C8(Carbamidomethyl)	923.407	0	0.0491248	High	2.1709	0	High	2.40695	0	High	2.05776	0	0
	LASELNHVQEVLEGYKK	8	5	2	P78386;O43790		1957.04	0	4.01733e-09	High	2.01734	0	High	4.99776	0	High	4.92038	0	1
	SDLEANVEALIQEIDFLR	1	3	1	O43790		2075.07	0	8.6824e-07				High	5.10613	0				0
	DLNMDCIIAEIK	2	3	2	P78386;O43790	M4(Oxidation); C6(Carbamidomethyl)	1450.69	0	1.0576e-05							High	3.42892	0	0
	SRAEAESWYR	3	5	2	P78386;O43790		1254.59	0.000475	0.00349349	High	3.69594	0	High	3.60379	0	High	3.09836	0	1
	LLEGEEQR	5	3	1	O43790		973.495	0.000475	0.00445976	High	2.66727	0	High	2.48987	0	High	2.75386	0	0
	RLYEEEIR	3	4	2	P78386;O43790		1107.58	0.000475	0.00342389	High	2.59445	0	High	2.73824	0	High	2.25868	0	1
	LTAEVENAK	5	4	1	O43790		974.516	0.000475	0.00925731	High	2.42473	0	High	2.52655	0	High	2.35378	0	0
	FAAFIDK	4	4	2	P78386;O43790		811.435	0.000475	0.00261556	High	2.18382	0	High	2.26098	0	High	2.01977	0	0
	LYEEEIR	3	4	2	P78386;O43790		951.478	0.000475	0.00944711	High	1.48024	0	High	1.37538	0	High	1.51534	0	0
	DVDCAYLR	4	5	2	P78386;O43790	C4(Carbamidomethyl)	1011.46	0.000908	0.0030149	High	1.96518	0	High	2.06161	0	High	1.78835	0	0
	EEINELNR	3	5	2	P78386;O43790		1016.5	0.000908	0.00285502	High	1.8197	0	High	1.84077	0	High	1.90402	0	0
	FLEQQNK	6	18	6	Q5XKE5;Q8N1N4;P13647;P02538;P78386;O43790		906.468	0.000908	0.00543583	High	1.7396	0	High	1.82447	0	Medium	1.75315	0	0
	LQFYQNR	3	3	1	O43790		968.495	0.001803	0.0157622	High	2.22625	0	High	2.15257	0	High	2.01822	0	0
	RLLEGEEQR	3	3	1	O43790		1129.6	0.006492	0.206567	High	2.44524	0	High	2.35634	0	Medium	2.4716	0	1
	AFSCISACGPRPGR	4	2	1	O43790	C4(Carbamidomethyl); C8(Carbamidomethyl)	1535.72	0.012708	0.172077	Medium	1.90129	0	Medium	2.13721	0	Low	2.07006	0	0
	LLETK	3	14	3	Q9NSB4;P78386;O43790		603.372	0.03219	0.418343	Medium	1.5286	0	Medium	1.2792	0	Medium	1.48406	0	0
	GISCYR	3	3	1	O43790	C4(Carbamidomethyl)	755.351	0.179353	0.966691	Low	0.891368	0	Low	0.886147	0	Low	0.779377	0	0
	AEAESWYR	3	5	2	P78386;O43790		1011.45	0.665044	1	Low	0.696085	0	Low	0.501139	0	Low	0.715027	0	0
	MTCGSYCGGR	1	1	1	O43790	C3(Carbamidomethyl); Y6(Nitro); C7(Carbamidomethyl)	1193.42	0.799267	1							Low	0.401534	0	0
	ATAENEFVALK	5	4	1	O43790	K11(HNE)	1348.75			Low	2.11222	0	Low	2.17986	0	Low	2.46539	0	0
	FAAFIDKVR	2	4	2	P78386;O43790	R9(MG-H1)	1120.61			Low	1.0772	0							1
	QDMACLIREYQEVMNSK	1	4	1	O43790	M3(Oxidation); C5(Carbamidomethyl); R8(MG-H1); M14(Oxidation); K17(ONE)	2355.05			Low	1.0184	0							1
	AEAESWYRSKCEEMK	1	5	2	P78386;O43790	Y7(Nitro); C11(Carbamidomethyl); M14(Oxidation); K15(HNE)	2120.91			Low	1.01144	0							2
	AQYDDIVTRSR	1	2	1	O43790		1323.65						Low	1.07984	0				1
	VGVCGGSCKR	1	1	1	O43790	C4(Carbamidomethyl); C8(Carbamidomethyl)	1079.5						Low	0.710159	0				1
	EAECVEADSGRLASELNHVQEVLEGYKKK	1	4	2	P78386;O43790	C4(Carbamidomethyl); R11(MG-H1); K29(HNE)	3498.72									Low	1.92165	0	3
	AEAESWYRSK	1	5	2	P78386;O43790	Y7(Nitro); R8(MG-H1); K10(HNE)	1481.69									Low	1.70326	0	1
	LGLDIEIATYRR	2	6	3	Q9NSB4;P78386;O43790	R11(MG-H1)	1473.82									Low	1.65182	0	1
	QDMACLIR	1	4	1	O43790	C5(Carbamidomethyl)	1006.47									Low	0.970956	0	0
	KDVDCAYLRK	1	5	2	P78386;O43790	K1(HNE); C5(Carbamidomethyl); Y7(Nitro); R9(MG-H1); K10(Glycation)	1684.8									Low	0.963942	0	2
	AGSCGRSFGYR	1	4	2	P78386;O43790	C4(Carbamidomethyl)	1217.55									Low	0.653503	0	1
	EAECVEADSGR	1	4	2	P78386;O43790	C4(Carbamidomethyl); R11(MG-H1)	1276.52									Low	0.523499	0	0
	MTCGSYCGGR	1	1	1	O43790	C3(Carbamidomethyl); C7(Carbamidomethyl); R10(MG-H1)	1202.43									Low	0.426185	0	0
P35908	Keratin, type II cytoskeletal 2 epidermal OS=Homo sapiens GN=KRT2 PE=1 SV=2 - [K22E_HUMAN]	90.77	6	51	72	892	844.325	90.77	69	297	850.822	90.77	70	293	884.813	90.45	69	302	639	65.3932	8.00146
	Sequence	# PSMs	# Proteins	# Protein Groups	Protein Group Accessions	Modifications	MH+ [Da]	q-Value	PEP	A2	XCorr A2	Probability A2	B2	XCorr B2	Probability B2	C2	XCorr C2	Probability C2	# Missed Cleavages
	WELLQQMNVGTRPINLEPIFQGYIDSLK	7	1	1	P35908		3302.72	0	1.67849e-10	High	6.6401	0	High	6.75259	0	High	7.53655	0	0
	GGGFGGGSSFGGGSGFSGGGFGGGGFGGGR	10	1	1	P35908		2399.02	0	0.00018191	High	6.4959	0	High	6.33595	0	High	5.96633	0	0
	MSGDLSSNVTVSVTSSTISSNVASK	22	1	1	P35908	M1(Oxidation)	2474.19	0	3.77471e-06	High	6.48223	0	High	6.33761	0	High	6.2978	0	0
	WELLQQMNVGTRPINLEPIFQGYIDSLK	15	1	1	P35908	M7(Oxidation)	3318.72	0	0.00135559	High	6.1305	0	High	7.00398	0	High	6.46579	0	0
	MSGDLSSNVTVSVTSSTISSNVASK	28	1	1	P35908		2458.2	0	4.38565e-06	High	6.0349	0	High	6.12583	0	High	5.73432	0	0
	NKLNDLEEALQQAKEDLAR	16	1	1	P35908		2198.14	0	4.92455e-12	High	5.88536	0	High	6.43386	0	High	6.89582	0	2
	FGGFGGPGGVGGLGGPGGFGPGGYPGGIHEVSVNQSLLQPLNVK	16	1	1	P35908		4092.07	0	3.41382e-10	High	5.82762	0	High	5.83522	0	High	6.06674	0	0
	TSQNSELNNMQDLVEDYK	3	1	1	P35908	M10(Oxidation)	2143.95	0	1.35268e-07	High	5.62511	0	High	5.14376	0	High	5.19872	0	0
	WELLQQMNVGTRPINLEPIFQGYIDSLKR	12	1	1	P35908		3458.83	0	0.0088036	High	5.60906	0	High	5.19843	0	High	5.35206	0	1
	NKLNDLEEALQQAK	14	1	1	P35908		1613.85	0	9.34167e-09	High	5.60103	0	High	5.32997	0	High	5.12258	0	1
	WELLQQMNVGTRPINLEPIFQGYIDSLK	35	1	1	P35908	M7(Oxidation); K28(HNE)	3474.82	0	0.000122528	High	5.5766	0	High	5.1324	0	High	5.34654	0	0
	WELLQQMNVGTRPINLEPIFQGYIDSLKR	35	1	1	P35908	M7(Oxidation)	3474.82	0	0.00939463	High	5.50653	0	High	5.12545	0	High	5.31077	0	1
	VLYDAEISQIHQSVTDTNVILSMDNSR	20	1	1	P35908		3048.49	0	6.13629e-05	High	5.50353	0	High	5.3828	0	High	5.58562	0	0
	WELLQQMNVGTRPINLEPIFQGYIDSLK	12	1	1	P35908	K28(HNE)	3458.82	0	8.14594e-07	High	5.41141	0	High	5.05324	0	High	5.24449	0	0
	TSQNSELNNMQDLVEDYK	5	1	1	P35908		2127.95	0	1.49798e-07	High	5.33617	0	High	5.43934	0	High	5.44023	0	0
	HGDSLKEIKIEISELNR	7	1	1	P35908		1981.07	0	0.0101464	High	5.30278	0	High	5.6584	0	High	5.10108	0	2
	VLYDAEISQIHQSVTDTNVILSMDNSR	16	1	1	P35908	M23(Oxidation)	3064.49	0	2.51983e-10	High	5.20328	0	High	4.80769	0	High	5.08318	0	0
	SISISVAGGGGGFGAAGGFGGR	53	1	1	P35908		1838.91	0	2.55464e-12	High	4.97441	0	High	5.51763	0	High	4.8805	0	0
	NLDLDSIIAEVKAQYEEIAQR	4	4	2	P02538;P35908	K12(Glycation)	2580.3	0	0.0104269	High	4.77196	0	High	3.5477	0	High	4.89924	0	1
	GGSGGGGSISGGGYGSGGGSGGR	3	1	1	P35908		1741.75	0	2.64187e-14	High	4.72608	0	High	4.52854	0	High	5.2788	0	0
	FLEQQNQVLQTK	14	3	3	Q7Z794;P35908;P04264		1475.79	0	0.0105678	High	4.59598	0	High	4.82209	0	High	4.75761	0	0
	HGGGGGGFGGGGFGSR	15	1	1	P35908		1320.58	0	1.61116e-08	High	4.55439	0	High	4.28822	0	High	4.62638	0	0
	VDLLNQEIEFLK	24	1	1	P35908		1460.8	0	1.09294e-07	High	4.3911	0	High	4.61523	0	High	4.54409	0	0
	GGSSSGGGYGSGGGGSSSVK	3	1	1	P35908		1588.68	0	0.000925454	High	4.2934	0	High	4.12036	0	High	3.16545	0	0
	LNDLEEALQQAK	10	1	1	P35908		1371.71	0	1.76916e-07	High	4.25874	0	High	4.15758	0	High	4.61149	0	0
	SKEEAEALYHSK	25	1	1	P35908		1391.68	0	5.95625e-08	High	4.24103	0	High	4.65196	0	High	4.52737	0	1
	TSQNSELNNMQDLVEDYKK	12	1	1	P35908		2256.05	0	3.8824e-08	High	4.21531	0	High	3.97491	0	High	4.37312	0	1
	GSSSGGGYSSGSSSYGSGGR	4	1	1	P35908		1740.71	0	1.86632e-10	High	4.19328	0	High	4.2108	0	High	3.77787	0	0
	NVQDAIADAEQRGEHALK	10	1	1	P35908		1964.98	0	8.50754e-05	High	4.18052	0	High	3.83964	0	High	4.0277	0	1
	LLRDYQELMNVK	8	4	2	Q5XKE5;P35908		1521.81	0	0.0410738	High	4.15863	0	High	4.10776	0	High	4.04756	0	1
	NVQDAIADAEQRGEHALKDAR	11	1	1	P35908		2307.14	0	1.31704e-08	High	4.12792	0	High	4.83506	0	High	4.78112	0	2
	NLDLDSIIAEVK	23	7	4	Q5XKE5;P02538;P35908;P13647		1329.73	0	3.27487e-05	High	4.11003	0	High	4.02615	0	High	4.23221	0	0
	YEELQVTVGR	23	1	1	P35908		1193.62	0	3.16141e-05	High	4.03687	0	High	3.42988	0	High	3.46605	0	0
	TSQNSELNNMQDLVEDYKK	6	1	1	P35908	M10(Oxidation)	2272.04	0	6.21031e-05	High	3.95903	0	High	4.30066	0	High	4.11704	0	1
	TAAENDFVTLKK	23	1	1	P35908		1336.71	0	6.17397e-05	High	3.92828	0	High	3.93705	0	High	3.52012	0	1
	DVDNAYMIKVELQSK	5	1	1	P35908		1752.88	0	5.17749e-07	High	3.91084	0	High	3.83266	0	High	3.2203	0	1
	NVQDAIADAEQR	17	1	1	P35908		1329.64	0	1.30337e-06	High	3.86427	0	High	3.52818	0	High	3.33681	0	0
	RYLDGLTAER	3	1	1	P35908		1193.63	0	0.000819656	High	3.85339	0	High	3.67094	0	High	3.41586	0	1
	LALDVEIATYRK	6	9	4	Q5XKE5;P02538;P35908;P13647		1391.79	0	9.95429e-06	High	3.76735	0	High	3.4551	0	High	3.70407	0	1
	KKYEDEINKR	11	3	1	P35908		1322.71	0	1.12964e-05	High	3.66541	0	High	4.15141	0	High	3.6397	0	3
	GGSISGGGYGSGGGK	6	1	1	P35908		1197.55	0	0.00770327	High	3.65596	0	High	3.48492	0	High	3.12372	0	0
	GFSSGSAVVSGGSR	18	1	1	P35908		1254.61	0	0.0266412	High	3.59255	0	High	4.00006	0	High	3.71703	0	0
	YLDGLTAER	9	1	1	P35908		1037.53	0	0.0356778	High	3.50184	0	High	3.00929	0	High	2.77591	0	0
	RSTSSFSCLSR	9	1	1	P35908	C8(Carbamidomethyl)	1287.61	0	0.000540442	High	3.43986	0	High	3.54824	0	High	3.64527	0	1
	LALDVEIATYR	22	9	4	Q5XKE5;P02538;P35908;P13647		1263.69	0	1.56047e-06	High	3.19496	0	High	3.52527	0	High	2.82344	0	0
	TSQNSELNNMQDLVEDYKKK	4	1	1	P35908		2384.14	0	1.38708e-05	High	3.13984	0	High	2.71992	0	High	2.81096	0	2
	KLLEGEECR	11	10	4	Q86Y46;P35908;P13647;P02538	C8(Carbamidomethyl)	1133.56	0	2.98562e-05	High	3.10567	0	High	3.10723	0	High	3.06207	0	1
	KYEDEINKR	16	3	1	P35908		1194.61	0	0.0014111	High	3.08861	0	High	3.06706	0	High	3.30543	0	2
	AQYEEIAQR	10	6	2	P02538;P35908		1107.54	0	0.000222616	High	2.98086	0	High	3.04713	0	High	3.22809	0	0
	IEISELNR	9	2	2	P35908;P04264		973.531	0	0.00136286	High	2.90919	0	High	2.82274	0	High	2.92639	0	0
	DVDNAYMIKVELQSK	4	1	1	P35908	M7(Oxidation)	1768.88	0	0.0168386	High	2.87293	0	High	1.85326	0	High	1.96438	0	1
	STSSFSCLSR	10	1	1	P35908	C7(Carbamidomethyl)	1131.51	0	0.0329861	High	2.86117	0	High	2.50465	0	High	1.76785	0	0
	LNDLEEALQQAKEDLAR	4	1	1	P35908		1956	0	0.00180851	High	2.79394	0	High	2.29372	0	High	3.17107	0	1
	LQGEIAHVKK	9	1	1	P35908		1122.66	0	0.00132187	High	2.57892	0	High	2.67705	0	High	2.75168	0	1
	SLVGLGGTK	7	1	1	P35908		831.493	0	0.00120768	High	2.53043	0	High	2.58647	0	High	2.73803	0	0
	KDVDNAYMIK	5	1	1	P35908	M8(Oxidation)	1212.59	0	0.000227623	High	2.1525	0	High	2.28052	0	High	2.27238	0	1
	VELQSKVDLLNQEIEFLK	2	1	1	P35908	K6(Glycation)	2307.23	0	9.49063e-05				High	3.03243	0	High	3.19922	0	1
	HGDSLKEIK	9	1	1	P35908		1026.56	0.000475	0.00859915	High	2.83017	0	High	3.03899	0	High	3.15874	0	1
	DVDNAYMIK	6	1	1	P35908	M7(Oxidation)	1084.5	0.000475	0.00300357	High	2.80402	0	High	2.56666	0	High	2.75141	0	0
	TAAENDFVTLK	8	1	1	P35908		1208.62	0.000475	0.00565642	High	2.54328	0	High	2.43417	0	High	2.4643	0	0
	KDVDNAYMIK	3	1	1	P35908		1196.6	0.000475	0.0043294	High	2.33072	0	High	2.26428	0	High	2.21981	0	1
	EIKIEISELNR	8	1	1	P35908		1343.75	0.000475	0.00332087	High	2.28247	0	High	2.37144	0	High	2.57837	0	1
	LQGEIAHVK	7	1	1	P35908		994.567	0.000475	0.00267942	High	2.23289	0	High	2.55744	0	High	2.82982	0	0
	AAFGGSGGR	3	1	1	P35908		779.379	0.000475	0.00999644	High	1.16189	0	High	0.98895	0	High	1.23338	0	0
	LLEGEECR	6	11	5	Q86Y46;P35908;P13647;P02538;Q8N1N4	C7(Carbamidomethyl)	1005.47	0.000475	0.00912091	Medium	1.01541	0	High	2.75621	0	High	2.81535	0	0
	DYQELMNVK	7	4	2	Q5XKE5;P35908		1139.54	0.000908	0.00255448	High	3.02679	0	High	3.03376	0	High	2.21903	0	0
	EEAEALYHSK	4	1	1	P35908		1176.55	0.000908	0.0038069	High	2.29166	0	High	2.56635	0	High	1.76173	0	0
	GGGGGGFR	3	2	1	P35908		664.316	0.000908	0.0114318	High	2.16643	0	High	1.90365	0	High	1.9894	0	0
	VDPEIQNVK	6	1	1	P35908		1041.56	0.000908	0.00759214	High	2.15028	0	Medium	1.6559	0	High	2.0476	0	0
	YEDEINK	3	12	6	Q5XKE5;Q7Z794;P02538;P35908;P13647;P04264		910.415	0.000908	0.00194671	High	2.10795	0	High	1.73702	0	High	2.20207	0	0
	FASFIDK	11	18	6	Q5XKE5;Q86Y46;Q7Z794;P02538;P35908;P13647		827.43	0.000908	0.00554679	High	2.00992	0	High	2.01274	0	High	1.94041	0	0
	YEDEINKR	13	11	5	Q7Z794;P02538;P35908;P13647;P04264		1066.52	0.000923	0.0133839	High	2.33296	0	High	2.2038	0	High	2.16838	0	1
	DVDNAYMIK	1	1	1	P35908		1068.5	0.001379	0.013951							High	1.76233	0	0
	FASFIDKVR	5	17	6	Q5XKE5;Q86Y46;Q7Z794;P02538;P35908;P13647		1082.6	0.001394	0.105287	High	2.09797	0	High	1.51442	0	High	1.83712	0	1
	KYEDEINK	6	3	1	P35908		1038.51	0.002127	0.0168403	Medium	2.35007	0	High	2.22109	0	High	2.15525	0	1
	RTAAENDFVTLK	4	1	1	P35908		1364.72	0.003252	0.163318	High	2.51505	0	High	2.49195	0	Medium	2.42075	0	1
	VELQSK	7	1	1	P35908		703.399	0.003734	0.0574033	Low	1.54897	0	Medium	1.34168	0	Medium	1.62742	0	0
	DYQELMNVK	2	4	2	Q5XKE5;P35908	M6(Oxidation)	1155.54	0.004116	0.0501313	High	1.11073	0	High	2.15963	0				0
	KKYEDEINK	3	3	1	P35908	K9(HNE)	1322.71	0.005574	0.0712459				High	3.44097	0	Low	3.13647	0	2
	LLRDYQELMNVK	1	4	2	Q5XKE5;P35908	M9(Oxidation)	1537.8	0.006124	0.203666	High	2.62384	0							1
	EDLAR	3	5	2	P35908;P04264		603.31	0.023246	0.306051	Low	0.68655	0	Low	0.496443	0	Medium	0.692236	0	0
	WELLQQMNVGTRPINLEPIFQGYIDSLK	3	1	1	P35908	K28(ONE)	3456.81	0.123429	0.599159	Low	2.92816	0	Low	1.9869	0				0
	MSCQISCK	1	1	1	P35908	M1(Oxidation); C3(Carbamidomethyl); C7(Carbamidomethyl); K8(ONE)	1183.53	0.794611	1							Low	0.861813	0	0
	WELLQQMNVGTRPINLEPIFQGYIDSLK	3	1	1	P35908	M7(Oxidation); K28(ONE)	3472.81			Low	2.50259	0	Low	2.48586	0				0
	EEAEALYHSKYEELQVTVGRHGDSLKEIK	1	1	1	P35908	Y7(Nitro); K10(Glycation); H21(ONE); K29(Glycation)	3881.91			Low	2.18879	0							3
	AQYEEIAQRSK	2	3	1	P35908	Y3(Nitro)	1367.66			Low	1.08689	0	Low	0.909306	0				1
	YEDEINKR	3	11	5	Q7Z794;P02538;P35908;P13647;P04264	Y1(Nitro)	1111.5			Low	0.894758	0	Low	0.899543	0	Low	0.711236	0	1
	MSCQISCKSR	1	1	1	P35908	C3(Carbamidomethyl); C7(Carbamidomethyl); R10(MG-H1)	1310.57			Low	0.722257	0							1
	KDVDNAYMIK	2	1	1	P35908	Y7(Nitro)	1241.58			Low	0.711906	0	Low	0.503851	0				1
	DVDNAYMIK	1	1	1	P35908	Y6(Nitro); M7(Oxidation)	1129.48			Low	0.577037	0							0
	WELLQQMNVGTRPINLEPIFQGYIDSLK	1	1	1	P35908	M7(Oxidation); R12(MG-H1); K28(Glycation)	3534.75						Low	2.4279	0				0
	TSQNSELNNMQDLVEDYK	1	1	1	P35908	Y17(Nitro); K18(HNE)	2329.06						Low	1.39643	0				0
	KDVDNAYMIK	1	1	1	P35908	K1(Glycation); K10(Glycation)	1520.69						Low	0.839173	0				1
	MSCQISCKSR	1	1	1	P35908	M1(Oxidation); C3(Carbamidomethyl); C7(Carbamidomethyl); K8(Glycation)	1434.6						Low	0.733879	0				1
	DYQELMNVK	1	4	2	Q5XKE5;P35908	M6(Oxidation); K9(ONE)	1309.64									Low	0.944852	0	0
P78386	Keratin, type II cuticular Hb5 OS=Homo sapiens GN=KRT85 PE=1 SV=1 - [KRT85_HUMAN]	83.43	9	15	48	176	119.993	76.92	39	57	133.457	74.36	36	56	130.46	79.29	40	63	507	55.7665	6.55127
	Sequence	# PSMs	# Proteins	# Protein Groups	Protein Group Accessions	Modifications	MH+ [Da]	q-Value	PEP	A2	XCorr A2	Probability A2	B2	XCorr B2	Probability B2	C2	XCorr C2	Probability C2	# Missed Cleavages
	SGGVCGPSPPCITTVSVNESLLTPLNLEIDPNAQCVK	5	4	2	P78386;O43790	C5(Carbamidomethyl); C11(Carbamidomethyl); C35(Carbamidomethyl)	3923.92	0	0.00639938	High	6.45796	0	High	4.65754	0	High	4.62979	0	0
	AKLEAAVAEAEQQGEAALSDAR	6	1	1	P78386		2228.12	0	8.2829e-05	High	6.1323	0	High	5.62648	0	High	4.59092	0	1
	KSDLEANVEALVEESSFLR	6	1	1	P78386		2136.08	0	6.57338e-08	High	5.58945	0	High	5.55909	0	High	5.43263	0	1
	CCESNLEPLFSGYIETLR	3	1	1	P78386	C1(Carbamidomethyl); C2(Carbamidomethyl)	2188	0	2.74215e-07	High	5.32079	0	High	4.84452	0	High	4.48314	0	0
	LASELNHVQEVLEGYK	7	5	2	P78386;O43790		1828.94	0	6.49877e-11	High	4.92175	0	High	5.28388	0	High	5.17101	0	0
	VLQAHISDTSVIVK	6	1	1	P78386		1509.86	0	2.09677e-07	High	4.26023	0	High	4.1273	0	High	4.60306	0	0
	LCEGVGSVNVCVSSSR	4	2	2	P78386;O43790	C2(Carbamidomethyl); C11(Carbamidomethyl)	1709.79	0	0.00168116	High	4.1994	0	High	4.52592	0	High	4.38484	0	0
	GGVSCGGLSYSTTPGR	4	1	1	P78386	C5(Carbamidomethyl)	1555.72	0	0.0489856	High	3.75238	0	High	3.53317	0	High	3.54275	0	0
	TKEEINELNR	6	5	2	P78386;O43790		1245.64	0	0.0315339	High	3.61776	0	High	3.84441	0	High	3.76296	0	1
	LAELEGALQK	3	5	2	P78386;O43790		1071.6	0	0.000165289	High	3.48635	0	High	3.61799	0	High	3.53835	0	0
	ATAENEFVVLKK	5	1	1	P78386		1348.75	0	0.000118014	High	3.02877	0	High	3.04812	0	High	3.50183	0	1
	LGLDIEIATYR	21	6	3	Q9NSB4;P78386;O43790		1263.69	0	0.00590555	High	3.01048	0	High	3.20033	0	Low	2.08927	0	0
	KYEEEVALR	3	3	1	P78386		1136.59	0	0.0364356	High	2.89292	0	High	2.75896	0	High	2.80111	0	1
	DLNMDCIIAEIK	5	3	2	P78386;O43790	C6(Carbamidomethyl)	1434.7	0	4.31587e-07	High	2.84642	0	High	3.38593	0	High	2.97116	0	0
	LTAEIENAK	3	1	1	P78386		988.531	0	0.000819946	High	2.52498	0	High	2.49368	0	High	2.54957	0	0
	ISSGCGVTR	3	1	1	P78386	C5(Carbamidomethyl)	936.457	0	0.0393474	High	2.26397	0	High	2.10922	0	High	2.12797	0	0
	SSSFSCGSSR	4	1	1	P78386	C6(Carbamidomethyl)	1061.43	0	0.000649293	High	2.20821	0	High	2.22652	0	High	2.37705	0	0
	CCISAAPYR	3	1	1	P78386	C1(Carbamidomethyl); C2(Carbamidomethyl)	1097.49	0	0.000618363	High	2.08516	0	High	2.72405	0	High	2.54134	0	0
	LASELNHVQEVLEGYKK	8	5	2	P78386;O43790		1957.04	0	4.01733e-09	High	2.01734	0	High	4.99776	0	High	4.92038	0	1
	DLNMDCIIAEIK	2	3	2	P78386;O43790	M4(Oxidation); C6(Carbamidomethyl)	1450.69	0	1.0576e-05							High	3.42892	0	0
	SRAEAESWYR	3	5	2	P78386;O43790		1254.59	0.000475	0.00349349	High	3.69594	0	High	3.60379	0	High	3.09836	0	1
	RLYEEEIR	3	4	2	P78386;O43790		1107.58	0.000475	0.00342389	High	2.59445	0	High	2.73824	0	High	2.25868	0	1
	LLEGEEHR	3	2	2	Q9NSB4;P78386		982.496	0.000475	0.00284113	High	2.29164	0	High	2.34375	0	High	2.65045	0	0
	FAAFIDK	4	4	2	P78386;O43790		811.435	0.000475	0.00261556	High	2.18382	0	High	2.26098	0	High	2.01977	0	0
	LYEEEIR	3	4	2	P78386;O43790		951.478	0.000475	0.00944711	High	1.48024	0	High	1.37538	0	High	1.51534	0	0
	DVDCAYLR	4	5	2	P78386;O43790	C4(Carbamidomethyl)	1011.46	0.000908	0.0030149	High	1.96518	0	High	2.06161	0	High	1.78835	0	0
	EEINELNR	3	5	2	P78386;O43790		1016.5	0.000908	0.00285502	High	1.8197	0	High	1.84077	0	High	1.90402	0	0
	SLCNLGSCGPR	3	1	1	P78386	C3(Carbamidomethyl); C8(Carbamidomethyl)	1220.55	0.000908	0.00974701	High	1.80196	0	High	1.97428	0	Medium	1.34185	0	0
	FLEQQNK	6	18	6	Q5XKE5;Q8N1N4;P13647;P02538;P78386;O43790		906.468	0.000908	0.00543583	High	1.7396	0	High	1.82447	0	Medium	1.75315	0	0
	AKQDMACLLK	3	2	2	Q9NSB4;P78386	C7(Carbamidomethyl)	1177.6	0.001821	0.110043	High	2.31532	0	High	2.12257	0	High	2.29571	0	1
	CCESNLEPLFSGYIETLRR	1	1	1	P78386	C1(Carbamidomethyl); C2(Carbamidomethyl)	2344.11	0.008465	0.103377				High	2.07283	0				1
	IAVGGFR	4	1	1	P78386		719.421	0.016656	0.278471	Low	1.53132	0	Medium	1.56878	0	Medium	1.60511	0	0
	LLETK	3	14	3	Q9NSB4;P78386;O43790		603.372	0.03219	0.418343	Medium	1.5286	0	Medium	1.2792	0	Medium	1.48406	0	0
	ATAENEFVVLK	1	1	1	P78386		1220.65	0.035826	0.392109	Medium	1.12011	0							0
	QDMACLLK	1	2	2	Q9NSB4;P78386	C5(Carbamidomethyl)	978.475	0.042927	0.458905				Medium	1.37202	0				0
	QITSGPSAIGGSITVVAPDSCAPCQPR	3	1	1	P78386	C21(Carbamidomethyl); C24(Carbamidomethyl)	2726.33	0.051604	0.44258	Low	2.3797	0	Low	3.246	0	Low	2.53269	0	0
	AKQDMACLLK	1	2	2	Q9NSB4;P78386	M5(Oxidation); C7(Carbamidomethyl)	1193.6	0.172283	1				Low	0.992323	0				1
	AEAESWYR	3	5	2	P78386;O43790		1011.45	0.665044	1	Low	0.696085	0	Low	0.501139	0	Low	0.715027	0	0
	KKYEEEVALRATAENEFVVLK	2	1	1	P78386	K1(Glycation); K2(ONE); Y3(Nitro)	2827.44			Low	1.71711	0							3
	ATAENEFVVLK	1	1	1	P78386	K11(HNE)	1376.78			Low	1.17534	0							0
	FAAFIDKVR	2	4	2	P78386;O43790	R9(MG-H1)	1120.61			Low	1.0772	0							1
	AEAESWYRSKCEEMK	1	5	2	P78386;O43790	Y7(Nitro); C11(Carbamidomethyl); M14(Oxidation); K15(HNE)	2120.91			Low	1.01144	0							2
	SSSFSCGSSRSVRFA	1	1	1	P78386	C6(Carbamidomethyl); R10(MG-H1); R13(MG-H1)	1729.75			Low	1.00969	0							2
	WQFYQNQR	2	1	1	P78386		1169.55			Low	0.828422	0	Low	0.595074	0				0
	EAECVEADSGRLASELNHVQEVLEGYKKK	1	4	2	P78386;O43790	C4(Carbamidomethyl); R11(MG-H1); K29(HNE)	3498.72									Low	1.92165	0	3
	AEAESWYRSK	1	5	2	P78386;O43790	Y7(Nitro); R8(MG-H1); K10(HNE)	1481.69									Low	1.70326	0	1
	LGLDIEIATYRR	2	6	3	Q9NSB4;P78386;O43790	R11(MG-H1)	1473.82									Low	1.65182	0	1
	KDVDCAYLRK	1	5	2	P78386;O43790	K1(HNE); C5(Carbamidomethyl); Y7(Nitro); R9(MG-H1); K10(Glycation)	1684.8									Low	0.963942	0	2
	AGSCGRSFGYR	1	4	2	P78386;O43790	C4(Carbamidomethyl)	1217.55									Low	0.653503	0	1
	EAECVEADSGR	1	4	2	P78386;O43790	C4(Carbamidomethyl); R11(MG-H1)	1276.52									Low	0.523499	0	0
	AQYDDVASR	1	1	1	P78386	Y3(Nitro); R9(MG-H1)	1123.47									Low	0.518096	0	0
P04406	Glyceraldehyde-3-phosphate dehydrogenase OS=Homo sapiens GN=GAPDH PE=1 SV=3 - [G3P_HUMAN]	80	2	17	20	83	59.2578	77.61	18	28	59.0508	76.12	17	28	52.7231	74.03	17	27	335	36.0304	8.45557
	Sequence	# PSMs	# Proteins	# Protein Groups	Protein Group Accessions	Modifications	MH+ [Da]	q-Value	PEP	A2	XCorr A2	Probability A2	B2	XCorr B2	Probability B2	C2	XCorr C2	Probability C2	# Missed Cleavages
	GILGYTEHQVVSSDFNSDTHSSTFDAGAGIALNDHFVK	4	1	1	P04406		4036.89	0	7.90986e-17	High	6.3092	0	High	6.70751	0	High	6.80909	0	0
	WGDAGAEYVVESTGVFTTMEK	3	1	1	P04406	M19(Oxidation)	2293.03	0	0.00108331	High	5.30692	0	High	5.3152	0	High	4.95033	0	0
	VIHDNFGIVEGLMTTVHAITATQK	7	1	1	P04406		2595.36	0	1.31486e-09	High	4.95924	0	High	5.42501	0	High	5.82249	0	0
	VDIVAINDPFIDLNYMVYMFQYDSTHGK	3	1	1	P04406		3308.57	0	0.00134026	High	4.31013	0	High	4.1636	0	High	4.62593	0	0
	LISWYDNEFGYSNR	4	1	1	P04406		1763.8	0	9.17048e-08	High	4.27891	0	High	2.98714	0	High	3.28426	0	0
	IISNASCTTNCLAPLAK	4	1	1	P04406	C7(Carbamidomethyl); C11(Carbamidomethyl)	1833.92	0	5.07733e-08	High	3.92848	0	High	4.13143	0	High	4.00131	0	0
	IKWGDAGAEYVVESTGVFTTMEK	1	1	1	P04406		2518.22	0	0.0469427	High	3.47033	0							1
	VPTANVSVVDLTCR	4	1	1	P04406	C13(Carbamidomethyl)	1530.8	0	0.000623669	High	3.23089	0	High	2.99864	0	High	3.03874	0	0
	VVDLMAHMASKE	3	1	1	P04406	M5(Oxidation); M8(Oxidation)	1362.64	0	0.0429205	High	3.04987	0	High	2.71521	0	High	1.81378	0	1
	VVDLMAHMASK	6	1	1	P04406		1201.61	0	2.465e-07	High	2.71561	0	High	2.32064	0	High	2.87823	0	0
	VGVNGFGR	3	1	1	P04406		805.432	0	0.0452036	High	1.87175	0	High	2.0164	0	Medium	1.63588	0	0
	VIHDNFGIVEGLMTTVHAITATQK	4	1	1	P04406	M13(Oxidation)	2611.35	0	1.04874e-06	Low	1.46136	0	High	5.657	0	High	3.85443	0	0
	LVINGNPITIFQER	1	1	1	P04406		1613.9	0	0.000253409				High	2.70924	0				0
	VIISAPSADAPMFVMGVNHEK	4	1	1	P04406		2213.11	0.000567	0.051516	High	3.07094	0	Low	1.87523	0	Low	1.42947	0	0
	GALQNIIPASTGAAK	5	1	1	P04406		1411.79	0.000908	0.0123042	High	1.38038	0	Medium	2.03618	0	Medium	2.26037	0	0
	LTGMAFR	3	2	1	P04406		795.418	0.000923	0.0109227	High	1.90966	0	High	1.16074	0	High	1.26189	0	0
	VVDLMAHMASKE	1	1	1	P04406		1330.65	0.000972	0.0783007	High	1.5109	0							1
	AAFNSGK	2	1	1	P04406		694.352	0.002127	0.0172291	High	1.5625	0				High	1.52213	0	0
	VIISAPSADAPMFVMGVNHEK	6	1	1	P04406	M12(Oxidation)	2229.1	0.002127	0.0177437	Medium	1.50528	0	High	1.26512	0	High	1.64001	0	0
	LTGMAFR	3	2	1	P04406	M4(Oxidation)	811.413	0.003554	0.17874	High	1.54582	0	Medium	1.26288	0	High	1.88294	0	0
	YDNSLK	3	1	1	P04406		739.362	0.008756	0.116137	Medium	1.43309	0	High	1.75782	0	Medium	1.4664	0	0
	QASEGPLK	5	1	1	P04406		829.442	0.08106	0.814014	Low	1.21733	0	Low	1.66123	0	Low	1.36815	0	0
	LVINGNPITIFQERDPSK	1	1	1	P04406		2041.11	0.082032	0.522308	Low	1.38729	0							1
	VIPELNGK	2	1	1	P04406		869.509						Low	0.922281	0	Low	0.989948	0	0
	VVDLMAHMASK	1	1	1	P04406	M5(Oxidation); M8(Oxidation)	1233.6						Low	0.766971	0				0
Q13867	Bleomycin hydrolase OS=Homo sapiens GN=BLMH PE=1 SV=1 - [BLMH_HUMAN]	79.34	1	29	33	166	133.448	65.27	27	58	126.749	63.74	28	51	142.693	77.14	29	57	455	52.528	6.26514
	Sequence	# PSMs	# Proteins	# Protein Groups	Protein Group Accessions	Modifications	MH+ [Da]	q-Value	PEP	A2	XCorr A2	Probability A2	B2	XCorr B2	Probability B2	C2	XCorr C2	Probability C2	# Missed Cleavages
	LVQFLLMNPANDGGQWDMLVNIVEK	3	1	1	Q13867	M7(Oxidation); M18(Oxidation)	2876.43	0	5.49426e-10	High	5.34483	0	High	6.21685	0	High	6.39481	0	0
	AQHVFQHAVPQEGKPITNQK	10	1	1	Q13867		2257.19	0	3.88463e-14	High	5.13057	0	High	4.74923	0	High	4.76886	0	0
	LVQFLLMNPANDGGQWDMLVNIVEK	3	1	1	Q13867		2844.44	0	1.45085e-05	High	5.07477	0	High	4.87937	0	High	5.20795	0	0
	LGLSDMNLYDHELVFGVSLK	6	1	1	Q13867		2250.15	0	0.00180698	High	4.72887	0	High	4.90452	0	High	4.91759	0	0
	KTLYNNQPIDFLK	7	1	1	Q13867		1593.86	0	2.19946e-06	High	4.71279	0	High	4.42563	0	High	4.73987	0	1
	VVCICLGNPPETFTWEYR	4	1	1	Q13867	C3(Carbamidomethyl); C5(Carbamidomethyl)	2241.05	0	0.00198574	High	4.6368	0	High	4.4055	0	High	4.24891	0	0
	LNSDPQFVLAQNVGTTHDLLDICLK	12	1	1	Q13867	C23(Carbamidomethyl); K25(HNE)	2967.54	0	0.000901142	High	4.46693	0	High	3.56277	0	High	4.00973	0	0
	LNSDPQFVLAQNVGTTHDLLDICLKR	6	1	1	Q13867	C23(Carbamidomethyl)	2967.54	0	0.0105217	High	4.39423	0	High	3.48599	0	High	4.12647	0	1
	GEISATQDVMMEEIFR	8	1	1	Q13867	M11(Oxidation)	1871.85	0	0.00351072	High	4.38239	0	High	4.2222	0	High	4.17395	0	0
	CYFFLSAFVDTAQR	3	1	1	Q13867	C1(Carbamidomethyl)	1724.81	0	0.00343514	High	3.98905	0	High	1.52075	0	High	4.1603	0	0
	LNSDPQFVLAQNVGTTHDLLDICLK	6	1	1	Q13867	C23(Carbamidomethyl)	2811.44	0	0.00150545	High	3.74531	0	High	3.69906	0	High	3.28868	0	0
	GEISATQDVMMEEIFR	3	1	1	Q13867	M10(Oxidation); M11(Oxidation)	1887.85	0	0.00392603	High	3.69155	0	High	4.71855	0	High	4.69921	0	0
	GYLCMTDEWFSEYVYEVVVDRK	2	1	1	Q13867	C4(Carbamidomethyl); M5(Oxidation)	2804.26	0	0.0281416	High	3.64793	0				High	3.64533	0	1
	LGLSDMNLYDHELVFGVSLK	4	1	1	Q13867	M6(Oxidation)	2266.14	0	9.35944e-10	High	3.54325	0	High	3.32352	0	High	4.27392	0	0
	LYTVEYLSNMVGGR	4	1	1	Q13867		1601.8	0	0.0090285	High	3.52882	0	High	3.8174	0	High	3.55119	0	0
	LYTVEYLSNMVGGR	3	1	1	Q13867	M10(Oxidation)	1617.8	0	0.0140759	High	3.31463	0	High	2.45239	0	High	2.93062	0	0
	LVQFLLMNPANDGGQWDMLVNIVEK	8	1	1	Q13867	M7(Oxidation)	2860.45	0	1.63381e-07	High	3.27097	0	High	5.40094	0	High	5.49872	0	0
	TLYNNQPIDFLKK	4	1	1	Q13867		1593.86	0	0.0244084	High	3.20626	0	High	3.2816	0	High	2.95902	0	1
	EHVKPLFNMEDK	3	1	1	Q13867		1486.74	0	0.0169885	High	3.1709	0	High	2.55571	0	High	2.5707	0	0
	ICLVNDPRPQHK	7	1	1	Q13867	C2(Carbamidomethyl)	1476.77	0	3.20509e-05	High	2.87675	0	High	2.65907	0	High	3.32984	0	0
	VENSWGEDHGHK	6	1	1	Q13867		1394.61	0	0.0279686	High	2.85614	0	High	2.55837	0	High	3.37487	0	0
	DGEAVWFGCDVGK	3	1	1	Q13867	C9(Carbamidomethyl)	1439.63	0	1.50765e-05	High	2.83815	0	High	3.23134	0	High	2.9196	0	0
	IGPITPLEFYR	6	1	1	Q13867		1305.72	0	0.0146844	High	2.55681	0	High	2.70727	0	High	2.37518	0	0
	GEISATQDVMMEEIFR	3	1	1	Q13867		1855.86	0	2.80119e-07	High	2.14125	0	High	3.39578	0	High	2.68766	0	0
	GYLCMTDEWFSEYVYEVVVDRK	3	1	1	Q13867	C4(Carbamidomethyl)	2788.26	0	5.68453e-05	High	1.88792	0	High	2.87428	0	High	2.9395	0	1
	LTFGESLMTHAMTFTAVSEKDDQDGAFTK	1	1	1	Q13867		3178.47	0	8.07097e-07							High	4.41368	0	1
	KLNIEEFEFSQSYLFFWDK	1	1	1	Q13867		2470.2	0	1.42511e-05							High	3.6349	0	1
	MNDILNHK	2	1	1	Q13867	M1(Oxidation)	1000.49	0.000475	0.00258202	High	2.25549	0				High	2.38512	0	0
	MNDILNHK	3	1	1	Q13867		984.494	0.000475	0.00467436	High	2.18648	0	High	2.52044	0	High	2.61124	0	0
	GYLCMTDEWFSEYVYEVVVDR	1	1	1	Q13867	C4(Carbamidomethyl); M5(Oxidation)	2676.16	0.000581	0.00158508				High	3.7679	0				0
	TLYNNQPIDFLK	3	1	1	Q13867		1465.77	0.000908	0.00370406	High	3.41043	0	High	3.45072	0	High	3.01815	0	0
	RMNDILNHK	4	1	1	Q13867		1140.59	0.000908	0.0101149	High	2.49258	0	High	3.10182	0	High	1.91609	0	1
	NLVHSGATK	3	1	1	Q13867		926.506	0.002127	0.0306623	Low	1.84606	0	High	1.65102	0	High	2.05764	0	0
	YGVIPK	3	1	1	Q13867		676.403	0.002518	0.0276866	High	2.2343	0	High	2.14851	0	High	2.11765	0	0
	VAALIQK	2	1	1	Q13867		742.482	0.003252	0.158243	High	2.20979	0				High	2.03411	0	0
	KTLYNNQPIDFLKK	3	1	1	Q13867		1721.96	0.009093	0.128309	Medium	2.05768	0	High	2.81845	0	Low	1.55052	0	2
	MVAASIK	3	1	1	Q13867		719.412	0.030302	0.401749	Low	1.07969	0	Medium	1.19356	0	Low	0.979688	0	0
	LPFMK	3	1	1	Q13867		635.358	0.035757	0.42996	Low	1.24217	0	Medium	1.47067	0	Low	1.29745	0	0
	LPFMK	3	1	1	Q13867	M4(Oxidation)	651.354	0.039239	0.442375	Low	0.693737	0	Medium	0.900743	0	Low	1.0633	0	0
	YNKLYTVEYLSNMVGGRKTLYNNQPIDFLK	1	1	1	Q13867	K3(ONE); R17(MG-H1); K18(Glycation); K30(Glycation)	4114.05	0.79534	1				Low	2.03064	0				3
	EFCIR	1	1	1	Q13867	C3(Carbamidomethyl)	724.345			Low	0.419691	0							0
	RMNDILNHKMR	1	1	1	Q13867	R1(MG-H1); M2(Oxidation); M10(Oxidation)	1513.73						Low	0.688909	0				2
	CWIFSCLNVMRLPFMK	1	1	1	Q13867	C1(Carbamidomethyl); C6(Carbamidomethyl); M10(Oxidation); R11(MG-H1); M15(Oxidation); K16(ONE)	2342.12									Low	1.85454	0	1
Q6KB66	Keratin, type II cytoskeletal 80 OS=Homo sapiens GN=KRT80 PE=1 SV=2 - [K2C80_HUMAN]	79.2	6	27	42	158	109.126	71.24	34	55	78.661	63.05	31	48	91.2627	72.12	37	55	452	50.4938	5.66846
	Sequence	# PSMs	# Proteins	# Protein Groups	Protein Group Accessions	Modifications	MH+ [Da]	q-Value	PEP	A2	XCorr A2	Probability A2	B2	XCorr B2	Probability B2	C2	XCorr C2	Probability C2	# Missed Cleavages
	TAEEQGELAFQDAK	3	1	1	Q6KB66		1536.72	0	4.08068e-08	High	4.56111	0	High	3.95853	0	High	3.78891	0	0
	WSFLQGQDSAIFDLGHLYEEYQGR	4	1	1	Q6KB66		2859.34	0	2.17598e-07	High	4.35579	0	High	4.3682	0	High	5.08051	0	0
	GQLEANLLQVLEK	5	1	1	Q6KB66		1454.82	0	0.0290629	High	4.33859	0	High	3.34755	0	High	3.50003	0	0
	LALDIEIATYR	28	6	2	P04264;Q6KB66		1277.71	0	0.00625154	High	4.09569	0	High	4.44712	0	High	3.33746	0	0
	TDMEFTFVQLK	4	1	1	Q6KB66	M3(Oxidation)	1374.66	0	5.5124e-06	High	3.85325	0	High	2.93138	0	High	3.81866	0	0
	TDMEFTFVQLK	3	1	1	Q6KB66		1358.67	0	0.000889982	High	3.78339	0	High	3.10062	0	High	3.65304	0	0
	CHIDLSGIVEEVK	3	1	1	Q6KB66	C1(Carbamidomethyl)	1498.76	0	0.0124969	High	3.73569	0	High	3.82823	0	High	2.90742	0	0
	VTVNPGLLVPLDVK	3	1	1	Q6KB66		1463.88	0	1.40226e-05	High	3.69266	0	High	3.63325	0	High	3.9218	0	0
	LAQLEAALQQAK	6	1	1	Q6KB66		1283.73	0	0.000323236	High	3.3603	0	High	3.30002	0	High	2.80405	0	0
	MDSPSATVVSAVQSR	2	1	1	Q6KB66		1534.75	0	2.95876e-06	High	3.30785	0				High	3.78375	0	0
	SLTGCWSAGTISK	3	1	1	Q6KB66	C5(Carbamidomethyl)	1367.66	0	0.0138696	High	2.87489	0	High	2.52955	0	High	2.25321	0	0
	DVSVTVGMDSR	2	1	1	Q6KB66		1165.55	0	8.95141e-05	High	2.8667	0				High	2.56784	0	0
	SAEYGSSLQSSR	5	1	1	Q6KB66		1271.59	0	0.00030843	High	2.78791	0	High	3.11881	0	High	2.86211	0	0
	SQLEEQAAR	4	1	1	Q6KB66		1031.51	0	0.00219703	High	2.71242	0	High	2.24892	0	High	2.26171	0	0
	SLEEAEAYSR	3	1	1	Q6KB66		1154.53	0	0.0420757	High	2.67462	0	High	2.40661	0	High	1.82837	0	0
	SEIADLNVR	3	1	1	Q6KB66		1016.54	0	0.000398979	High	2.56413	0	High	2.24816	0	High	2.26126	0	0
	SLESFVELMK	3	1	1	Q6KB66		1182.61	0	0.0198882	High	2.28886	0	High	1.92241	0	High	1.55543	0	0
	DLDAECLHR	3	1	1	Q6KB66	C6(Carbamidomethyl)	1128.51	0	0.0462445	High	2.10493	0	High	1.98616	0	High	2.0416	0	0
	LDPAVQQLK	3	1	1	Q6KB66		1011.58	0	0.00200111	High	2.10156	0	Low	1.13862	0	High	1.66883	0	0
	VQALEQR	3	1	1	Q6KB66		843.468	0.000475	0.00986937	High	2.26511	0	High	2.23054	0	High	2.47187	0	0
	SLESFVELMK	1	1	1	Q6KB66	M9(Oxidation)	1198.6	0.000475	0.00291624							High	2.25852	0	0
	IRYEDEISKR	3	1	1	Q6KB66		1308.69	0.000972	0.0795328	High	3.41011	0				Medium	2.67415	0	2
	DVSVTVGMDSR	3	1	1	Q6KB66	M8(Oxidation)	1181.55	0.000972	0.0743083	High	2.03026	0	High	1.65123	0	High	1.50908	0	0
	LQEELRK	3	1	1	Q6KB66		915.526	0.002127	0.0208372	High	2.32497	0	Medium	1.70463	0	High	2.18877	0	1
	NQLLETR	3	1	1	Q6KB66		873.479	0.002127	0.0198939	High	1.96369	0	High	2.05624	0	High	2.28297	0	0
	FASLIGK	3	1	1	Q6KB66		735.44	0.002127	0.0344881	High	1.58318	0	High	1.51965	0	High	1.70181	0	0
	TELETK	2	1	1	Q6KB66		720.377	0.004116	0.050274				High	1.61861	0	Low	0.825737	0	0
	LQEELR	3	6	1	Q6KB66		787.431	0.007732	0.0946321	High	1.18104	0	High	1.09773	0	Low	0.608577	0	0
	VEEFR	3	1	1	Q6KB66		679.341	0.013044	0.255043	Medium	1.08048	0	Low	1.07875	0	Medium	1.36883	0	0
	APGPGFSSR	1	1	1	Q6KB66		875.437	0.016896	0.212782				Medium	1.26997	0				0
	KYQELMNVK	1	1	1	Q6KB66		1152.61	0.029845	0.387153							Medium	1.19227	0	1
	IRYEDEISK	1	1	1	Q6KB66		1152.59	0.058694	0.609898							Low	1.60235	0	1
	YEDEISKR	3	1	1	Q6KB66	R8(MG-H1)	1093.52	0.695221	1	Low	1.06896	0	Low	0.610976	0	Low	0.903899	0	1
	TAASRSGLSKAPSRK	1	1	1	Q6KB66	K15(Glycation)	1678.92	0.725874	1							Low	1.23167	0	3
	TELETKLKSLESFVELMKTIYEQELK	1	1	1	Q6KB66	K18(ONE); Y21(Nitro); K26(Glycation)	3490.82			Low	1.8494	0							3
	KYQELMNVK	5	1	1	Q6KB66	M6(Oxidation); K9(ONE)	1322.71			Low	1.68601	0	Low	1.23745	0	Low	1.36398	0	1
	YQELMNVK	3	1	1	Q6KB66	K8(ONE)	1178.62			Low	1.55451	0	Low	1.35593	0	Low	1.63842	0	0
	YQELMNVK	3	1	1	Q6KB66	M5(Oxidation); K8(ONE)	1194.61			Low	1.47855	0	Low	1.4836	0	Low	1.5301	0	0
	ITEMSEK	3	1	1	Q6KB66		837.396			Low	1.06155	0	Low	1.1264	0	Low	0.949056	0	0
	KLVEGEEGR	3	1	1	Q6KB66		1016.54			Low	1.03981	0	Low	1.24922	0	Low	1.12392	0	1
	EEMKALNDK	1	1	1	Q6KB66	M3(Oxidation)	1093.52			Low	0.708942	0							1
	APSRKK	3	1	1	Q6KB66	K5(ONE)	840.53			Low	0.705993	0				Low	0.851068	0	2
	NQEKEEMK	1	1	1	Q6KB66	K8(HNE)	1191.59			Low	0.699704	0							1
	ITEMSEK	3	1	1	Q6KB66	M4(Oxidation); K7(Glycation)	1015.44			Low	0.698617	0	Low	0.648332	0				0
	ITEMSEK	3	1	1	Q6KB66	K7(Glycation)	999.445			Low	0.580246	0	Low	0.546283	0	Low	0.461613	0	0
	DLDAECLHRTELETK	1	1	1	Q6KB66	C6(Carbamidomethyl); H8(ONE); K15(Glycation)	2146						Low	1.40339	0				1
	KYQELMNVK	1	1	1	Q6KB66	K1(Glycation); Y2(Nitro); K9(HNE)	1515.76						Low	1.007	0				1
	CKTAASRSGLSK	1	1	1	Q6KB66	C1(Carbamidomethyl); K2(HNE); R7(MG-H1)	1475.79									Low	1.31954	0	2
	AQYDAVAAR	1	1	1	Q6KB66		964.485									Low	1.20658	0	0
	LEENIK	1	1	1	Q6KB66		745.41									Low	1.12098	0	0
P31944	Caspase-14 OS=Homo sapiens GN=CASP14 PE=1 SV=2 - [CASPE_HUMAN]	78.1	1	18	20	95	81.7672	75.62	19	33	76.7935	70.25	18	33	70.4038	67.36	18	29	242	27.662	5.57959
	Sequence	# PSMs	# Proteins	# Protein Groups	Protein Group Accessions	Modifications	MH+ [Da]	q-Value	PEP	A2	XCorr A2	Probability A2	B2	XCorr B2	Probability B2	C2	XCorr C2	Probability C2	# Missed Cleavages
	EGFLKGEDGEMVKLENLFEALNNK	4	1	1	P31944	M11(Oxidation)	2740.35	0	0.00570114	High	5.40766	0	High	5.30829	0				2
	GSCFIQTLVDVFTK	4	1	1	P31944	C3(Carbamidomethyl)	1614.82	0	8.16761e-09	High	4.68888	0	High	3.8688	0	High	4.10657	0	0
	GHILELLTEVTR	6	1	1	P31944		1380.78	0	0.00842798	High	4.41088	0	High	4.50762	0	High	4.20921	0	0
	MAEAELVQEGK	3	1	1	P31944		1204.59	0	4.38342e-06	High	3.91403	0	High	3.73827	0	High	3.69689	0	0
	MAEAELVQEGK	4	1	1	P31944	M1(Oxidation)	1220.58	0	3.12703e-06	High	3.64134	0	High	3.38601	0	High	3.65948	0	0
	EDPVSCAFVVLMAHGR	11	1	1	P31944	C6(Carbamidomethyl)	1787.86	0	2.52503e-05	High	3.49814	0	High	3.56433	0	High	3.65092	0	0
	RMAEAELVQEGK	3	1	1	P31944		1360.69	0	0.0266659	High	3.46861	0	High	3.54756	0				1
	EGSEEDLDALEHMFR	2	1	1	P31944	M13(Oxidation)	1793.76	0	0.0414483	High	3.40951	0	Low	1.11872	0				0
	DPTAEQFQEELEK	3	1	1	P31944		1563.72	0	0.00745207	High	3.36942	0	High	3.17274	0	High	3.59286	0	0
	KGHILELLTEVTR	3	1	1	P31944		1508.88	0	1.05091e-07	High	3.2703	0	High	3.95139	0	High	3.80253	0	1
	EGSEEDLDALEHMFR	6	1	1	P31944		1777.77	0	6.22289e-09	High	3.24376	0	High	2.75191	0	High	3.55966	0	0
	RDPTAEQFQEELEK	3	1	1	P31944		1719.82	0	3.03509e-06	High	3.17624	0	High	3.44552	0	High	3.59583	0	1
	AREGSEEDLDALEHMFR	5	1	1	P31944		2004.91	0	2.88153e-09	High	2.94356	0	High	4.18628	0	High	3.87916	0	1
	LENLFEALNNK	3	1	1	P31944		1304.68	0	8.84642e-05	High	2.68455	0	High	1.37365	0	High	3.34319	0	0
	LALILCVTK	3	1	1	P31944	C6(Carbamidomethyl)	1030.63	0	1.87944e-06	High	2.53367	0	High	2.49626	0	High	2.4336	0	0
	FQQAIDSR	3	1	1	P31944		964.485	0	0.00160435	High	1.89484	0	High	2.04213	0	High	2.26774	0	0
	DSPQTIPTYTDALHVYSTVEGYIAYR	3	1	1	P31944		2960.43	0	0.0368871	High	1.76136	0	High	1.62143	0	Medium	2.04197	0	0
	KTNPEIQSTLR	5	1	1	P31944		1286.71	0	8.36135e-05	Low	1.41108	0	High	2.29532	0	High	2.68475	0	1
	TNPEIQSTLR	5	1	1	P31944		1158.61	0.000475	0.00354155	High	1.6476	0	High	2.08687	0	High	1.72055	0	0
	EDPVSCAFVVLMAHGR	2	1	1	P31944	C6(Carbamidomethyl); M12(Oxidation)	1803.85	0.000475	0.00594761				High	3.5908	0	High	3.63941	0	0
	NCQALR	3	1	1	P31944	C2(Carbamidomethyl)	761.372	0.0022	0.128649	High	1.4043	0	High	1.4898	0	Medium	1.51802	0	0
	EGFLKGEDGEMVKLENLFEALNNK	1	1	1	P31944		2724.36	0.008374	0.208948	High	2.60308	0							2
	FESTMK	1	1	1	P31944	M5(Oxidation)	758.339	0.384523	1							Low	1.18462	0	0
	RMAEAELVQEGK	6	1	1	P31944	M2(Oxidation); K12(HNE)	1532.81			Low	1.88414	0	Low	1.66222	0	Low	1.86034	0	1
	MAEAELVQEGK	2	1	1	P31944	K11(HNE)	1360.69			Low	1.33059	0	Low	1.52491	0				0
	SLEEEKYDMSGAR	1	1	1	P31944	Y7(Nitro); R13(MG-H1)	1613.68			Low	0.667011	0							1
P02533	Keratin, type I cytoskeletal 14 OS=Homo sapiens GN=KRT14 PE=1 SV=4 - [K1C14_HUMAN]	77.97	9	19	51	247	184.166	72.03	39	84	181.68	77.33	44	89	169.117	76.91	39	74	472	51.5294	5.16064
	Sequence	# PSMs	# Proteins	# Protein Groups	Protein Group Accessions	Modifications	MH+ [Da]	q-Value	PEP	A2	XCorr A2	Probability A2	B2	XCorr B2	Probability B2	C2	XCorr C2	Probability C2	# Missed Cleavages
	ILTATVDNANVLLQIDNAR	8	1	1	P02533		2054.12	0	0.00260386	High	6.29801	0	High	6.12607	0	High	6.64947	0	0
	GQVGGDVNVEMDAAPGVDLSR	3	1	1	P02533		2085.99	0	0.000306034	High	5.90384	0	High	5.46335	0	High	4.99809	0	0
	YCMQLAQIQEMIGSVEEQLAQLR	10	1	1	P02533	C2(Carbamidomethyl); M3(Oxidation); M11(Oxidation)	2770.32	0	5.01251e-09	High	5.73771	0	High	5.77565	0	High	5.46976	0	0
	TMQNLEIELQSQLSMK	4	1	1	P02533	M2(Oxidation); M15(Oxidation)	1924.94	0	0.00302692	High	4.93348	0	High	3.14251	0				0
	TMQNLEIELQSQLSMK	10	1	1	P02533		1892.95	0	0.00557042	High	4.74284	0	High	5.24151	0	High	5.09965	0	0
	ALEEANADLEVK	4	4	1	P02533		1301.66	0	0.00529494	High	4.70045	0	High	4.4721	0	High	4.64842	0	0
	YCMQLAQIQEMIGSVEEQLAQLR	4	1	1	P02533	C2(Carbamidomethyl); M3(Oxidation)	2754.32	0	0.000143422	High	4.59563	0	High	4.73924	0				0
	GQVGGDVNVEMDAAPGVDLSR	3	1	1	P02533	M11(Oxidation)	2101.98	0	0.00458844	High	4.15894	0	High	4.01783	0	High	4.55309	0	0
	ADLEMQIESLKEELAYLK	9	1	1	P02533	M5(Oxidation)	2139.09	0	0.00196002	High	4.00849	0	High	4.09952	0	High	4.18883	0	1
	EVATNSELVQSGK	3	2	2	P02533;Q04695		1361.69	0	1.02249e-08	High	3.78933	0	High	4.14694	0	High	4.20307	0	0
	ADLEMQIESLKEELAYLKK	9	1	1	P02533	M5(Oxidation)	2267.19	0	3.38483e-05	High	3.73043	0	High	3.30072	0	High	3.85205	0	2
	CEMEQQNQEYK	1	2	2	P02533;Q04695	C1(Carbamidomethyl); M3(Oxidation)	1502.59	0	0.0169123	High	3.70746	0							0
	YCMQLAQIQEMIGSVEEQLAQLR	3	1	1	P02533	C2(Carbamidomethyl)	2738.33	0	2.2761e-06	High	3.60872	0	High	5.50678	0	High	5.21751	0	0
	ADLEMQIESLKEELAYLK	6	1	1	P02533		2123.09	0	0.0339913	High	3.48984	0	High	4.61197	0	High	4.42148	0	1
	CEMEQQNQEYK	3	2	2	P02533;Q04695	C1(Carbamidomethyl)	1486.6	0	0.0122933	High	3.44293	0	High	3.46805	0	High	3.90496	0	0
	VLDELTLAR	3	5	2	P02533;Q04695		1029.59	0	0.0381391	High	3.32021	0	High	3.26738	0	High	3.10857	0	0
	APSTYGGGLSVSSSR	3	1	1	P02533		1425.7	0	2.10849e-08	High	3.30001	0	High	3.30842	0	High	3.01892	0	0
	ISSVLAGGSCR	4	2	1	P02533	C10(Carbamidomethyl)	1106.56	0	0.000404587	High	3.24419	0	High	3.03856	0	High	2.96528	0	0
	GSCGIGGGIGGGSSR	4	2	1	P02533	C3(Carbamidomethyl)	1278.59	0	4.97869e-08	High	2.93389	0	High	3.90447	0	High	3.49276	0	0
	LEQEIATYR	3	8	2	P02533;Q04695		1122.58	0	0.0244648	High	2.87338	0	High	1.41649	0	High	1.96077	0	0
	VTMQNLNDR	7	7	2	P02533;P13645	M3(Oxidation)	1106.53	0	0.0325054	High	2.71241	0	High	2.844	0	High	2.67082	0	0
	LASYLDKVR	9	7	3	P02533;Q04695;P13645		1064.61	0	7.01552e-05	High	2.45328	0	High	2.73174	0	High	2.92151	0	1
	VTMQNLNDR	10	7	2	P02533;P13645		1090.53	0	0.00193949	High	2.43691	0	High	2.50573	0	High	2.48976	0	0
	ASLENSLEETKGR	5	2	1	P02533		1433.72	0	0.0366457	High	2.35869	0	High	2.73421	0				1
	LAADDFR	12	17	8	O76015;Q92764;P02533;Q04695;P13645;Q15323;Q14532;Q14525		807.4	0	0.00133535	High	2.28148	0	High	2.48472	0	High	2.36499	0	0
	RVLDELTLAR	1	5	2	P02533;Q04695		1185.7	0	0.0236298	High	2.26566	0							1
	NHEEEMNALR	3	2	2	P02533;Q04695		1242.55	0	0.0382611	High	2.13212	0	High	2.26863	0	High	2.0024	0	0
	DAEEWFFTK	6	1	1	P02533		1172.53	0	7.02351e-05	High	2.01941	0	High	1.49157	0	High	2.54402	0	0
	ADLEMQIESLKEELAYLKK	4	1	1	P02533		2251.19	0	8.66352e-10	High	1.95126	0	High	4.15534	0	High	3.31316	0	2
	TMQNLEIELQSQLSMK	5	1	1	P02533	M15(Oxidation)	1908.94	0	4.30637e-06	Medium	1.59002	0	High	3.58503	0	High	4.30892	0	0
	MSVEADINGLR	1	2	1	P02533	M1(Oxidation)	1220.59	0	0.000139333							High	2.69591	0	0
	TKYETELNLR	6	1	1	P02533		1266.67	0.000475	0.0101754	High	2.90085	0	High	2.57442	0	High	2.60863	0	1
	NHEEEMNALR	3	2	2	P02533;Q04695	M6(Oxidation)	1258.55	0.000908	0.00695033	Medium	2.62624	0	High	2.03015	0	High	1.90319	0	0
	ASLENSLEETK	4	2	1	P02533		1220.6	0.000908	0.00187047	Low	1.91966	0	High	1.74279	0	High	1.55447	0	0
	IRDWYQR	6	3	2	P02533;Q04695		1036.53	0.002127	0.0224363	Medium	2.12582	0	High	2.0417	0	Medium	2.17094	0	1
	QFTSSSSMK	4	2	1	P02533		1002.46	0.002127	0.0393734	High	1.87449	0	Medium	1.44818	0	High	1.69236	0	0
	ILLDVK	3	2	2	P02533;Q04695		700.461	0.002127	0.0387048	Medium	1.70027	0	Medium	1.70363	0	High	1.94944	0	0
	VMDVHDGK	1	1	1	P02533		900.425	0.002518	0.0230012				High	1.47547	0				0
	LASYLDK	7	8	4	P02533;Q04695;P13645;P35527		809.44	0.00524	0.062535	High	2.20594	0	Low	2.08368	0	Medium	1.96598	0	0
	ILNEMR	3	3	2	P02533;Q04695		775.413	0.006061	0.0937786	Medium	1.50481	0	High	1.59668	0	High	1.59692	0	0
	ILNEMR	2	3	2	P02533;Q04695	M5(Oxidation)	791.408	0.007732	0.0972598	Medium	1.09075	0	High	1.44619	0				0
	TIEDLR	1	2	1	P02533		746.404	0.009447	0.136011				High	1.17109	0				0
	ADLEMQIESLK	1	1	1	P02533	M5(Oxidation)	1292.64	0.011315	0.244829	Medium	1.09698	0							0
	TEELNR	5	4	2	P02533;Q04695		761.379	0.012708	0.171824	Medium	1.71341	0	Medium	1.31914	0	Medium	1.09097	0	0
	SEISELR	3	2	2	P02533;Q04695		833.437	0.02213	0.302785	Low	1.40771	0	Medium	1.2047	0	Low	1.66585	0	0
	QRPAEIK	2	1	1	P02533		841.489	0.05063	0.558929				Low	1.67161	0	Low	1.83584	0	0
	SEISELRR	4	2	2	P02533;Q04695		989.538	0.098865	0.557359	Low	0.875661	0	Low	1.15308	0	Low	2.00221	0	1
	DYSPYFK	2	2	1	P02533		919.419	0.164496	1				Low	0.761217	0	Low	0.544471	0	0
	VTMQNLNDRLASYLDK	3	3	2	P02533;P13645	R9(MG-H1); Y13(Nitro)	1979.94	0.224204	1	Low	1.37383	0	Low	1.8471	0	Low	1.31688	0	1
	MSVEADINGLRR	3	2	1	P02533	M1(Oxidation)	1376.69	0.344215	1				Low	1.20682	0	Low	1.62802	0	1
	DYSPYFKTIEDLRNK	6	2	1	P02533	Y2(Nitro); R13(MG-H1); K15(Glycation)	2149.99	0.631664	1	Low	1.36921	0	Low	1.49057	0	Low	1.56586	0	2
	TKVMDVHDGK	1	1	1	P02533	K2(Glycation); M4(Oxidation)	1307.62	0.657433	1				Low	1.08534	0				1
	DVTSSSRQIR	3	1	1	P02533	R7(MG-H1)	1202.6	0.755764	1	Low	0.980785	0	Low	1.04233	0	Low	1.24268	0	1
	GSCGIGGGIGGGSSR	1	2	1	P02533	C3(Carbamidomethyl); R15(MG-H1)	1332.59	0.781126	1				Low	1.11968	0				0
	DQYEKMAEKNRK	1	2	2	P02533;Q04695	Y3(Nitro); K5(ONE)	1738.84			Low	1.51474	0							3
	ILNEMRDQYEKMAEK	2	2	2	P02533;Q04695	Y9(Nitro); K11(Glycation)	2104.95			Low	1.38693	0	Low	1.42427	0				2
	KNHEEEMNALR	2	2	2	P02533;Q04695	R11(MG-H1)	1424.65			Low	1.18573	0	Low	1.1349	0				1
	YETELNLR	1	1	1	P02533		1037.53			Low	0.506374	0							0
	IRDWYQRQRPAEIKDYSPYFK	1	1	1	P02533	Y5(Nitro); Y16(Nitro); Y19(Nitro); K21(ONE)	3048.47						Low	1.78984	0				3
	DQYEKMAEK	1	2	2	P02533;Q04695	M6(Oxidation)	1157.51						Low	0.935204	0				1
	LEQEIATYR	1	8	2	P02533;Q04695	Y8(Nitro)	1167.57						Low	0.695069	0				0
	DWYQR	1	3	2	P02533;Q04695		767.347						Low	0.497713	0				0
	QIRTKVMDVHDGK	1	1	1	P02533	R3(MG-H1); K5(Glycation); K13(HNE)	1898.99									Low	1.76748	0	2
	VRALEEANADLEVK	1	4	1	P02533	R2(MG-H1)	1610.85									Low	1.1917	0	1
	DQYEKMAEK	1	2	2	P02533;Q04695		1141.52									Low	0.835664	0	1
Q96FQ6	Protein S100-A16 OS=Homo sapiens GN=S100A16 PE=1 SV=1 - [S10AG_HUMAN]	73.79	1	2	7	18	7.82606	69.9	6	9	14.7433	37.86	3	6	2.05258	33.01	3	3	103	11.794	6.78564
	Sequence	# PSMs	# Proteins	# Protein Groups	Protein Group Accessions	Modifications	MH+ [Da]	q-Value	PEP	A2	XCorr A2	Probability A2	B2	XCorr B2	Probability B2	C2	XCorr C2	Probability C2	# Missed Cleavages
	ISFDEYWTLIGGITGPIAK	4	1	1	Q96FQ6		2081.1	0	0.0196524	High	5.41072	0	High	4.72086	0				0
	AVIVLVENFYK	3	1	1	Q96FQ6		1294.74	0.000567	0.0550194	High	2.41534	0	High	1.94004	0	High	1.55343	0	0
	EMLQKELNHMLSDTGNRK	2	1	1	Q96FQ6	M2(Oxidation); K5(ONE); H9(HNE); R17(MG-H1)	2524.3			Low	1.85712	0							2
	SSFREMLQK	1	1	1	Q96FQ6	R4(MG-H1); M6(Oxidation)	1195.58			Low	1.26846	0							1
	YSLVKNKISK	1	1	1	Q96FQ6	Y1(Nitro); K7(Glycation); K10(HNE)	1542.85			Low	1.09331	0							2
	SSFREMLQK	4	1	1	Q96FQ6	R4(MG-H1); M6(Oxidation); K9(Glycation)	1357.62			Low	1.00283	0	Low	1.24661	0	Low	1.29428	0	1
	MSDCYTELEK	1	1	1	Q96FQ6	C4(Carbamidomethyl); K10(ONE)	1429.63			Low	0.831185	0							0
	MSDCYTELEK	1	1	1	Q96FQ6	C4(Carbamidomethyl)	1275.53			Low	0.80754	0							0
	YVSKYSLVKNKISK	1	1	1	Q96FQ6	K4(Glycation); K14(Glycation)	1981.07									Low	2.05258	0	3
P22531	Small proline-rich protein 2E OS=Homo sapiens GN=SPRR2E PE=2 SV=2 - [SPR2E_HUMAN]	73.61	6	3	4	14	9.95985	61.11	3	5	9.76615	43.06	2	4	4.39798	73.61	4	5	72	7.84959	8.30908
	Sequence	# PSMs	# Proteins	# Protein Groups	Protein Group Accessions	Modifications	MH+ [Da]	q-Value	PEP	A2	XCorr A2	Probability A2	B2	XCorr B2	Probability B2	C2	XCorr C2	Probability C2	# Missed Cleavages
	CPPVTPSPPCQPK	2	2	1	P22531	C1(Carbamidomethyl); C10(Carbamidomethyl)	1464.7	0	0.0120858	High	1.72	0				High	1.52254	0	0
	QPCQPPPVCPTPK	5	5	1	P22531	C3(Carbamidomethyl); C9(Carbamidomethyl)	1505.72	0.000581	0.00134026	High	1.75703	0	High	2.42336	0	High	1.48824	0	0
	CPEPCPPPK	6	6	1	P22531	C1(Carbamidomethyl); C5(Carbamidomethyl)	1081.48	0.000908	0.0117209	High	2.60522	0	High	2.77298	0	High	2.48621	0	0
	MSYQQQQCK	1	6	1	P22531	M1(Oxidation); Y3(Nitro); C8(Carbamidomethyl); K9(HNE)	1417.62									Low	0.563752	0	0
P05089	Arginase-1 OS=Homo sapiens GN=ARG1 PE=1 SV=2 - [ARGI1_HUMAN]	73.29	1	21	23	95	85.8436	73.29	22	34	80.4269	66.15	19	30	73.6369	68.94	20	31	322	34.7133	7.21045
	Sequence	# PSMs	# Proteins	# Protein Groups	Protein Group Accessions	Modifications	MH+ [Da]	q-Value	PEP	A2	XCorr A2	Probability A2	B2	XCorr B2	Probability B2	C2	XCorr C2	Probability C2	# Missed Cleavages
	LKEQECDVKDYGDLPFADIPNDSPFQIVK	3	1	1	P05089	C6(Carbamidomethyl)	3380.64	0	0.0340703	High	5.76021	0	High	6.17771	0	High	5.76804	0	2
	RPIHLSFDVDGLDPSFTPATGTPVVGGLTYR	6	1	1	P05089		3285.69	0	7.47851e-10	High	5.60109	0	High	7.0093	0	High	3.10412	0	0
	KRPIHLSFDVDGLDPSFTPATGTPVVGGLTYR	1	1	1	P05089		3413.79	0	0.0180538	High	4.70975	0							1
	IPDVPGFSWVTPCISAK	5	1	1	P05089	C13(Carbamidomethyl)	1873.95	0	7.6036e-08	High	4.58356	0	High	3.92554	0	High	4.46686	0	0
	GKIPDVPGFSWVTPCISAK	6	1	1	P05089	C15(Carbamidomethyl)	2059.07	0	0.00047369	High	4.51323	0	High	4.38998	0	High	4.16856	0	1
	TGLLSGLDIMEVNPSLGK	2	1	1	P05089	M10(Oxidation)	1859.98	0	0.00145152	High	4.44033	0	High	4.04338	0				0
	DYGDLPFADIPNDSPFQIVK	3	1	1	P05089		2251.09	0	1.10203e-06	High	4.41651	0	High	4.81006	0	High	4.53452	0	0
	ISLVLGGDHSLAIGSISGHAR	7	1	1	P05089		2060.13	0	6.19826e-09	High	4.36882	0	High	4.52119	0	High	4.58571	0	0
	VMEETLSYLLGR	3	1	1	P05089	M2(Oxidation)	1426.73	0	1.05235e-06	High	3.67294	0	High	3.64335	0	High	3.76664	0	0
	TVNTAVAITLACFGLAR	4	1	1	P05089	C12(Carbamidomethyl)	1777.96	0	0.00190104	High	3.02866	0				High	2.71275	0	0
	GGVEEGPTVLR	5	1	1	P05089		1113.59	0	8.58648e-05	High	2.79185	0	High	2.92973	0	High	2.99266	0	0
	DVDPGEHYILK	5	1	1	P05089		1285.64	0	0.000614083	High	2.18291	0	High	2.18975	0	High	2.45642	0	0
	YFSMTEVDR	3	1	1	P05089	M4(Oxidation)	1163.5	0	0.000199541	High	1.66723	0	High	1.54752	0	High	2.13736	0	0
	TGLLSGLDIMEVNPSLGK	2	1	1	P05089		1843.98	0	1.10479e-10				High	3.69427	0	High	4.56961	0	0
	DIVYIGLR	3	1	1	P05089		948.552	0.000475	0.0047815	High	2.24563	0	High	2.68993	0	High	2.03347	0	0
	TIGIIGAPFSK	3	1	1	P05089		1103.65	0.000475	0.00714374	High	2.21472	0	High	2.48608	0	High	2.63942	0	0
	VMEETLSYLLGR	4	1	1	P05089		1410.73	0.000581	0.00134026	Medium	1.50743	0	High	1.77719	0	High	1.23563	0	0
	LKEQECDVK	7	1	1	P05089	C6(Carbamidomethyl)	1148.56	0.000908	0.00208789	High	1.60961	0	High	2.00027	0	High	1.97973	0	1
	ASEQLAGK	1	1	1	P05089		803.426	0.000908	0.00596579				High	2.88535	0				0
	EGLYITEEIYK	3	1	1	P05089		1357.69	0.0022	0.128391	High	2.24023	0	High	2.63003	0	Medium	2.30815	0	0
	TPEEVTR	3	1	1	P05089		831.421	0.002518	0.0387613	High	2.38247	0	High	2.36851	0	High	1.94339	0	0
	GGVEEGPTVLRK	3	1	1	P05089		1241.68	0.003923	0.188181	High	2.16176	0	Low	2.78957	0	High	2.50251	0	1
	AGLLEK	2	1	1	P05089		630.382	0.006863	0.207539	High	1.79104	0				Medium	1.79442	0	0
	YFSMTEVDR	3	1	1	P05089		1147.51	0.01063	0.236502	Medium	1.15751	0	Medium	0.704299	0	Low	0.741888	0	0
	KAGLLEK	3	1	1	P05089		758.477	0.126551	0.605019	Low	2.24497	0	Low	2.06048	0	Low	2.08107	0	1
	DVDPGEHYILK	4	1	1	P05089	K11(ONE)	1439.75	0.730937	1				Low	1.19576	0	Low	1.14497	0	0
	ASEQLAGKVAEVK	1	1	1	P05089		1329.73			Low	1.45966	0							1
P04264	Keratin, type II cytoskeletal 1 OS=Homo sapiens GN=KRT1 PE=1 SV=6 - [K2C1_HUMAN]	73.14	7	55	70	996	765.554	72.36	67	331	753.48	73.14	68	327	783.978	72.36	67	338	644	65.999	8.11865
	Sequence	# PSMs	# Proteins	# Protein Groups	Protein Group Accessions	Modifications	MH+ [Da]	q-Value	PEP	A2	XCorr A2	Probability A2	B2	XCorr B2	Probability B2	C2	XCorr C2	Probability C2	# Missed Cleavages
	LDNLQQEIDFLTALYQAELSQMQTQISETNVILSMDNNR	12	1	1	P04264	M22(Oxidation); M35(Oxidation)	4559.19	0	0.0132603	High	6.93946	0	High	5.54528	0	High	6.58418	0	0
	LDNLQQEIDFLTALYQAELSQMQTQISETNVILSMDNNR	12	1	1	P04264		4527.2	0	3.48553e-10	High	6.55111	0	High	6.68241	0	High	7.06031	0	0
	GGGGGGYGSGGSSYGSGGGSYGSGGGGGGGR	7	1	1	P04264		2383.95	0	1.13257e-11	High	6.00396	0	High	5.64762	0	High	5.66537	0	0
	DAKNKLNDLEDALQQAKEDLAR	6	1	1	P04264		2498.28	0	0.000997747	High	5.91924	0	High	4.02069	0	High	3.27351	0	3
	LDSELKNMQDMVEDYRNKYEDEINK	13	1	1	P04264	K25(HNE)	3275.53	0	0.000201694	High	5.82478	0	High	4.97957	0	High	5.73986	0	3
	GSYGSGGSSYGSGGGSYGSGGGGGGHGSYGSGSSSGGYR	5	1	1	P04264		3312.31	0	0.00567894	High	5.67135	0	High	6.94816	0	High	6.60982	0	0
	THNLEPYFESFINNLR	28	1	1	P04264		1993.98	0	0.00471377	High	5.6497	0	High	5.70636	0	High	4.72124	0	0
	NKLNDLEDALQQAKEDLAR	16	1	1	P04264		2184.13	0	0.00147338	High	5.57525	0	High	5.62205	0	High	5.70985	0	2
	FSSCGGGGGSFGAGGGFGSR	56	1	1	P04264	C4(Carbamidomethyl)	1765.74	0	0.000796366	High	5.52416	0	High	5.67351	0	High	5.72767	0	0
	LDNLQQEIDFLTALYQAELSQMQTQISETNVILSMDNNR	33	1	1	P04264	M35(Oxidation)	4543.2	0	1.01411e-05	High	5.36692	0	High	6.43078	0	High	5.78945	0	0
	LDSELKNMQDMVEDYRNKYEDEINK	56	1	1	P04264	M11(Oxidation); K25(HNE)	3291.53	0	2.3402e-07	High	5.35544	0	High	5.66564	0	High	4.65317	0	3
	LNDLEDALQQAKEDLAR	8	1	1	P04264		1941.99	0	1.47073e-09	High	5.25235	0	High	5.04058	0	High	4.89934	0	1
	LDSELKNMQDMVEDYR	5	1	1	P04264		1985.89	0	0.00231718	High	4.86514	0	High	4.39847	0	High	4.93021	0	1
	SGGGFSSGSAGIINYQR	7	1	1	P04264		1657.79	0	9.23839e-08	High	4.80052	0	High	4.39355	0	High	4.63767	0	0
	LDSELKNMQDMVEDYR	18	1	1	P04264	M11(Oxidation)	2001.89	0	0.00132883	High	4.73584	0	High	4.22146	0	High	4.18243	0	1
	NKLNDLEDALQQAK	16	1	1	P04264		1599.83	0	1.42839e-09	High	4.71189	0	High	5.1171	0	High	5.31519	0	1
	FLEQQNQVLQTK	14	3	3	Q7Z794;P35908;P04264		1475.79	0	0.0105678	High	4.59598	0	High	4.82209	0	High	4.75761	0	0
	LNDLEDALQQAK	8	1	1	P04264		1357.7	0	8.75287e-07	High	4.58198	0	High	4.21307	0	High	4.18412	0	0
	MSGECAPNVSVSVSTSHTTISGGGSR	8	1	1	P04264	C5(Carbamidomethyl)	2565.17	0	3.57552e-08	High	4.557	0	High	4.31859	0	High	4.46818	0	0
	SLDLDSIIAEVK	21	1	1	P04264		1302.72	0	0.000230589	High	4.46088	0	High	4.53368	0	High	4.44959	0	0
	MSGECAPNVSVSVSTSHTTISGGGSR	7	1	1	P04264	M1(Oxidation); C5(Carbamidomethyl)	2581.16	0	8.4371e-07	High	4.41664	0	High	3.95637	0	High	4.04528	0	0
	KQISNLQQSISDAEQR	7	1	1	P04264		1844.95	0	1.52525e-11	High	4.40596	0	High	4.36477	0	High	4.46426	0	1
	LDSELKNMQDMVEDYR	10	1	1	P04264	M8(Oxidation); M11(Oxidation)	2017.88	0	0.000342947	High	4.34487	0	High	4.20734	0	High	4.14213	0	1
	NMQDMVEDYRNKYEDEINK	8	1	1	P04264	K19(HNE)	2590.17	0	0.000176282	High	4.30702	0	High	4.70555	0	High	3.9388	0	2
	SKAEAESLYQSK	13	1	1	P04264		1340.67	0	0.04572	High	4.21548	0	High	4.41357	0	High	3.7968	0	1
	RTNAENEFVTIKK	2	1	1	P04264		1549.83	0	0.00216208	High	4.17278	0	High	3.57665	0				2
	NMQDMVEDYRNKYEDEINKR	4	1	1	P04264		2590.17	0	0.0264048	High	4.15135	0	High	4.63199	0	High	3.9285	0	3
	LALDLEIATYR	28	6	2	P04264;Q6KB66		1277.71	0	0.00625154	High	4.09569	0	High	4.44712	0	High	3.33746	0	0
	WELLQQVDTSTR	7	1	1	P04264		1475.75	0	0.0335832	High	4.01773	0	High	3.76969	0	High	3.72976	0	0
	LLRDYQELMNTK	9	1	1	P04264		1523.79	0	0.0299367	High	3.87226	0	High	3.74073	0	High	3.70813	0	1
	SLDLDSIIAEVKAQYEDIAQK	11	1	1	P04264	K12(Glycation)	2511.27	0	1.32427e-08	High	3.77066	0	High	3.19224	0	High	3.81252	0	1
	THNLEPYFESFINNLR	10	1	1	P04264	H2(HNE)	2150.08	0	9.9526e-11	High	3.75753	0	High	4.24069	0	Medium	3.9103	0	0
	LLRDYQELMNTK	7	1	1	P04264	M9(Oxidation)	1539.79	0	0.000599743	High	3.75084	0	High	3.60157	0	High	3.16468	0	1
	LRSEIDNVKK	15	1	1	P04264		1201.69	0	0.00068231	High	3.7388	0	High	3.57892	0	High	3.87666	0	2
	NMQDMVEDYRNKYEDEINKR	22	1	1	P04264	M5(Oxidation)	2606.16	0	0.000596491	High	3.7026	0	High	3.4976	0	High	3.93636	0	3
	QISNLQQSISDAEQR	10	1	1	P04264		1716.85	0	1.69715e-06	High	3.63795	0	High	3.66441	0	High	3.29756	0	0
	SLNNQFASFIDK	20	1	1	P04264		1383.69	0	2.62035e-05	High	3.59698	0	High	3.71129	0	High	4.0586	0	0
	YEELQITAGR	11	2	1	P04264		1179.6	0	0.000441898	High	3.58147	0	High	3.53352	0	High	3.70368	0	0
	TNAENEFVTIKK	17	1	1	P04264		1393.73	0	0.000377858	High	3.56944	0	High	3.53056	0	High	3.52429	0	1
	GSGGGSSGGSIGGR	10	1	1	P04264		1092.5	0	0.0461474	High	3.53455	0	High	3.28593	0	High	3.31174	0	0
	SLNNQFASFIDKVR	5	1	1	P04264		1638.86	0	0.039991	High	3.50021	0	High	3.34121	0	High	1.57733	0	1
	NMQDMVEDYR	42	1	1	P04264	M5(Oxidation)	1316.53	0	0.000726945	High	3.47718	0	High	3.44321	0	High	3.30241	0	0
	QISNLQQSISDAEQRGENALKDAK	7	1	1	P04264		2643.33	0	0.0471746	High	3.46941	0	High	2.72022	0	High	2.58625	0	2
	NSKIEISELNR	9	1	1	P04264		1302.7	0	0.0365931	High	3.30965	0	High	2.96306	0	High	3.47175	0	1
	AEAESLYQSK	6	1	1	P04264		1125.54	0	0.00136306	High	3.3062	0	High	3.43142	0	High	3.36465	0	0
	NMQDMVEDYR	8	1	1	P04264	M2(Oxidation); M5(Oxidation)	1332.52	0	0.000117412	High	3.11914	0	High	3.21742	0	High	3.04964	0	0
	RTNAENEFVTIK	3	1	1	P04264		1421.74	0	2.159e-05	High	2.96769	0	High	3.11449	0	High	3.42897	0	1
	THNLEPYFESFINNLRR	15	1	1	P04264		2150.08	0	1.92048e-05	Medium	2.95916	0	High	2.63226	0	High	2.90493	0	1
	IEISELNR	9	2	2	P35908;P04264		973.531	0	0.00136286	High	2.90919	0	High	2.82274	0	High	2.92639	0	0
	TNAENEFVTIK	11	1	1	P04264		1265.64	0	4.50399e-06	High	2.86819	0	High	3.4989	0	High	3.65047	0	0
	DVDGAYMTK	8	1	1	P04264	M7(Oxidation)	1015.44	0	0.0424995	High	2.813	0	High	2.38916	0	High	2.31325	0	0
	NMQDMVEDYR	7	1	1	P04264		1300.53	0	0.00100862	High	2.65951	0	High	2.53799	0	High	3.29969	0	0
	QISNLQQSISDAEQRGENALK	5	1	1	P04264		2329.17	0	0.00134026	High	2.6462	0	High	3.3562	0	High	2.6121	0	1
	VDQLKSDQSR	5	1	1	P04264		1175.6	0	0.0465415	High	2.60659	0	High	2.6728	0	High	2.50535	0	1
	SLVNLGGSK	13	1	1	P04264		874.499	0	0.000964091	High	2.4284	0	High	2.84337	0	High	3.22348	0	0
	KDVDGAYMTK	3	1	1	P04264		1127.54	0	0.000667514	High	2.33814	0	High	2.07715	0	High	2.3402	0	1
	DVDGAYMTK	5	1	1	P04264		999.445	0	0.00106936	High	1.96249	0	High	1.82771	0	High	1.85934	0	0
	NMQDMVEDYRNKYEDEINK	41	1	1	P04264	M5(Oxidation); K19(HNE)	2606.16	0.000475	0.00924067	High	3.66052	0	High	3.46706	0	High	3.94049	0	2
	NKYEDEINKR	29	6	3	P02538;P13647;P04264		1308.65	0.000475	0.0090096	High	3.33335	0	High	3.31484	0	High	3.44097	0	2
	KDVDGAYMTK	4	1	1	P04264	M8(Oxidation)	1143.53	0.000475	0.0073286	High	2.60784	0	High	2.49738	0	High	2.5127	0	1
	AQYEDIAQK	13	1	1	P04264		1065.52	0.000475	0.00625892	High	2.57761	0	High	2.87025	0	High	2.77998	0	0
	SEIDNVKK	15	1	1	P04264		932.505	0.000475	0.0058201	Medium	2.29831	0	High	1.88851	0	High	2.16892	0	1
	DYQELMNTK	5	1	1	P04264		1141.52	0.000475	0.00488575	Medium	1.4732	0	High	2.67273	0	High	1.95888	0	0
	TLLEGEESR	8	1	1	P04264		1033.52	0.000908	0.0118979	Medium	2.6683	0	High	2.41251	0	High	2.54649	0	0
	YEDEINK	3	12	6	Q5XKE5;Q7Z794;P02538;P35908;P13647;P04264		910.415	0.000908	0.00194671	High	2.10795	0	High	1.73702	0	High	2.20207	0	0
	DYQELMNTK	3	1	1	P04264	M6(Oxidation)	1157.51	0.000908	0.00214197	High	1.46432	0	High	2.58802	0	High	1.44538	0	0
	GENALKDAK	10	1	1	P04264		945.5	0.000923	0.0105439	High	2.33961	0	High	2.88138	0	High	2.77081	0	1
	YEDEINKR	13	11	5	Q7Z794;P02538;P35908;P13647;P04264		1066.52	0.000923	0.0133839	High	2.33296	0	High	2.2038	0	High	2.16838	0	1
	NKYEDEINK	6	7	4	Q5XKE5;P02538;P13647;P04264		1152.55	0.000923	0.012373	High	2.12815	0	High	1.75297	0	High	2.5497	0	1
	SISISVAR	8	1	1	P04264		832.489	0.001821	0.111988	High	2.36968	0	High	2.30379	0	High	2.07349	0	0
	SEIDNVK	6	1	1	P04264		804.409	0.002518	0.037374	High	1.6457	0	High	2.07943	0	High	1.50747	0	0
	LDSELK	14	4	1	P04264		704.383	0.007732	0.0964882	Low	1.47603	0	Medium	1.71571	0	Medium	1.80675	0	0
	LRSEIDNVK	7	1	1	P04264		1073.6	0.011639	0.132675	Low	2.43068	0	Low	2.3459	0	Medium	2.44876	0	1
	VDLQAK	7	1	1	P04264		673.388	0.014079	0.197338	Medium	1.64346	0	Low	1.56855	0	Medium	1.81052	0	0
	RVDQLK	7	1	1	P04264		758.452	0.021469	0.288388	Low	1.8481	0	Low	1.76462	0	Medium	2.22036	0	1
	EDLAR	3	5	2	P35908;P04264		603.31	0.023246	0.306051	Low	0.68655	0	Low	0.496443	0	Medium	0.692236	0	0
	NKYEDEINK	3	7	4	Q5XKE5;P02538;P13647;P04264	K9(HNE)	1308.66	0.029535	0.382619	Low	2.04931	0				Medium	2.21763	0	1
	GENALK	3	2	1	P04264		631.341	0.035757	0.431943	Medium	1.25763	0	Medium	1.54036	0	Medium	1.54543	0	0
	VDQLK	6	2	1	P04264		602.351	0.047288	0.51857	Low	1.90985	0	Medium	1.82717	0	Low	1.98224	0	0
	DVDGAYMTK	1	1	1	P04264	Y6(Nitro); M7(Oxidation)	1060.42	0.07268	0.495498	Low	1.20956	0							0
	RRVDQLK	3	1	1	P04264		914.554	0.127311	0.72849				Low	2.12675	0	Low	1.75801	0	2
	SLNNQFASFIDKVR	1	1	1	P04264	K12(Glycation)	1800.91	0.208292	1				Low	1.42753	0				1
	QFSSR	3	1	1	P04264		624.31	0.225812	0.724165	Low	0.497344	0	Low	0.493473	0	Low	0.499481	0	0
	LDSELKNMQDMVEDYRNKYEDEINK	1	1	1	P04264	M8(Oxidation); M11(Oxidation); K18(HNE)	3307.52	0.379687	0.897682	Low	2.02804	0							3
	LDNLQQEIDFLTALYQAELSQMQTQISETNVILSMDNNR	1	1	1	P04264	R39(MG-H1)	4581.17	0.42379	1							Low	2.8582	0	0
	NMQDMVEDYRNK	3	1	1	P04264	M2(Oxidation); M5(Oxidation); Y9(Nitro)	1619.63	0.584948	1	Low	1.64056	0	Low	1.35306	0	Low	1.58276	0	1
	GSYGSGGSSYGSGGGSYGSGGGGGGHGSYGSGSSSGGYR	15	1	1	P04264	Y17(Nitro); Y29(Nitro); R39(MG-H1)	3456.26	0.796861	1				Low	1.10488	0	Low	1.57761	0	0
	SKAEAESLYQSKYEELQITAGR	1	1	1	P04264	Y9(Nitro); K12(ONE); R22(MG-H1)	2754.32			Low	1.84612	0							2
	RVDQLK	2	1	1	P04264	R1(MG-H1)	812.455			Low	1.53889	0	Low	1.54053	0				1
	SDQSRLDSELKNMQDMVEDYRNK	3	1	1	P04264	M13(Oxidation); R21(MG-H1); K23(Glycation)	3033.32			Low	1.18571	0	Low	1.08841	0	Low	1.16425	0	3
	YEDEINKR	3	11	5	Q7Z794;P02538;P35908;P13647;P04264	Y1(Nitro)	1111.5			Low	0.894758	0	Low	0.899543	0	Low	0.711236	0	1
	SGYRSGGGFSSGSAGIINYQRR	1	1	1	P04264		2277.13						Low	1.59305	0				2
	KDVDGAYMTKVDLQAK	1	1	1	P04264	K1(ONE); Y7(Nitro); M8(Oxidation)	1996.97									Low	1.53774	0	2
	SLNNQFASFIDKVR	1	1	1	P04264	K12(HNE); R14(MG-H1)	1848.99									Low	1.19404	0	1
	KDVDGAYMTKVDLQAK	1	1	1	P04264	K1(ONE); K16(HNE)	2092.11									Low	0.952657	0	2
	AQYEDIAQK	1	1	1	P04264	Y3(Nitro); K9(HNE)	1266.62									Low	0.872224	0	0
	NMQDMVEDYRNK	1	1	1	P04264	R10(MG-H1); K12(ONE)	1750.78									Low	0.673271	0	1
	NKYEDEINK	1	7	4	Q5XKE5;P02538;P13647;P04264	Y3(Nitro)	1197.55									Low	0.593431	0	1
P07355	Annexin A2 OS=Homo sapiens GN=ANXA2 PE=1 SV=2 - [ANXA2_HUMAN]	71.39	2	22	33	123	75.7049	64.31	27	41	81.0345	68.44	27	42	80.7871	66.08	26	40	339	38.5798	7.75244
	Sequence	# PSMs	# Proteins	# Protein Groups	Protein Group Accessions	Modifications	MH+ [Da]	q-Value	PEP	A2	XCorr A2	Probability A2	B2	XCorr B2	Probability B2	C2	XCorr C2	Probability C2	# Missed Cleavages
	SALSGHLETVILGLLK	7	2	1	P07355		1650.98	0	0.00166237	High	5.26984	0	High	4.84975	0	High	5.13081	0	0
	AEDGSVIDYELIDQDAR	5	1	1	P07355		1908.88	0	2.6141e-06	High	4.56124	0	High	3.83011	0	High	4.15129	0	0
	GVDEVTIVNILTNR	6	1	1	P07355		1542.85	0	0.000127145	High	4.44125	0	High	3.9529	0	High	3.45181	0	0
	RAEDGSVIDYELIDQDAR	6	1	1	P07355		2064.98	0	0.0291224	High	3.85931	0	High	4.09748	0	High	3.58339	0	1
	GDLENAFLNLVQCIQNKPLYFADR	4	1	1	P07355	C13(Carbamidomethyl)	2838.42	0	2.62897e-08	High	3.48178	0	High	3.88581	0	High	4.42252	0	0
	TKGVDEVTIVNILTNR	4	1	1	P07355		1771.99	0	6.51942e-05	High	3.25863	0	High	2.01985	0	High	3.37747	0	1
	QDIAFAYQR	2	1	1	P07355		1111.55	0	0.0423318	High	3.07145	0							0
	TNQELQEINR	3	2	1	P07355		1244.62	0	0.0244367	High	2.98203	0	High	2.75899	0	High	3.01142	0	0
	TPAQYDASELK	3	2	1	P07355		1222.59	0	2.86155e-06	High	2.83936	0	High	3.33648	0	High	3.24681	0	0
	GLGTDEDSLIEIICSR	6	2	1	P07355	C14(Carbamidomethyl)	1777.86	0	7.87113e-07	High	2.82153	0	High	3.57117	0	High	4.15936	0	0
	TDLEKDIISDTSGDFRK	4	2	1	P07355		1939.96	0	1.08136e-08	High	2.78974	0	High	3.02293	0	High	3.18291	0	2
	TDLEKDIISDTSGDFR	7	2	1	P07355		1811.87	0	1.63135e-05	Medium	2.41989	0	High	4.39448	0	High	3.23314	0	1
	WISIMTER	3	2	1	P07355		1035.53	0	0.0496856	High	2.17479	0	Medium	1.67938	0	High	1.82216	0	0
	SYSPYDMLESIR	3	2	1	P07355		1460.67	0	3.31659e-05	High	2.11685	0	High	2.65015	0	High	2.45115	0	0
	SLYYYIQQDTK	3	2	1	P07355		1421.7	0	2.82849e-05	High	1.91277	0	High	2.53309	0	High	2.40765	0	0
	DIISDTSGDFRK	2	2	1	P07355		1353.66	0.000908	0.00187047	High	2.49615	0	High	2.40389	0				1
	KLMVALAK	3	2	1	P07355		873.559	0.000908	0.00997397	Low	1.51713	0	High	2.04165	0	High	1.9586	0	1
	DLYDAGVKR	1	1	1	P07355		1036.54	0.001394	0.106853	High	2.24122	0							1
	DALNIETAIK	2	2	1	P07355		1087.6	0.002127	0.0279424				High	2.66278	0	High	2.24618	0	0
	LMVALAK	3	2	1	P07355	M2(Oxidation)	761.459	0.00524	0.0619045	Medium	1.95467	0	High	2.21306	0	High	2.04539	0	0
	LYDSMK	2	1	1	P07355		756.359	0.006124	0.203132	High	1.34178	0	Low	0.91723	0				0
	VYKEMYK	4	2	1	P07355	M5(Oxidation)	976.481	0.007732	0.0939288	Low	1.2207	0	High	1.75052	0				1
	LMVALAK	3	2	1	P07355		745.464	0.017141	0.227635	Medium	1.44895	0	Medium	1.35875	0	Medium	0.945579	0	0
	LYDSMK	3	1	1	P07355	M5(Oxidation)	772.355	0.017141	0.231027	Low	1.13194	0	Medium	1.12854	0	Low	1.25931	0	0
	IMVSR	3	3	2	P07355;P04083		605.344	0.050269	0.586341	Low	0.760939	0	Low	1.03191	0	Low	0.763706	0	0
	GTDVPK	3	2	1	P07355		616.33	0.060992	0.467789	Low	0.942196	0	Low	0.632993	0	Low	1.13514	0	0
	DLYDAGVK	2	1	1	P07355		880.441	0.115633	0.585361	Low	1.27302	0				Low	1.41565	0	0
	SLYYYIQQDTKGDYQK	12	2	1	P07355	Y4(Nitro); Y5(Nitro); K11(ONE)	2257.03	0.253543	1	Low	1.54055	0	Low	1.32248	0	Low	1.59872	0	1
	KGTDVPK	1	2	1	P07355		744.425	0.468295	0.96246	Low	0.845249	0							1
	SYSPYDMLESIRKEVK	4	2	1	P07355	R12(MG-H1); K13(ONE); K16(ONE)	2307.18			Low	2.17187	0	Low	2.14118	0	Low	2.11131	0	2
	SLYYYIQQDTKGDYQK	1	2	1	P07355	Y3(Nitro); Y4(Nitro); Y5(Nitro); K11(Glycation)	2309.99			Low	1.01415	0							1
	YGKSLYYYIQQDTKGDYQK	1	2	1	P07355	K19(ONE)	2515.22						Low	1.24502	0				2
	GKGTRDK	2	2	1	P07355	K2(Glycation); R5(MG-H1); K7(Glycation)	1139.55						Low	1.06687	0	Low	0.580861	0	2
	QDIAFAYQRRTKK	1	1	1	P07355	R9(MG-H1)	1678.92						Low	0.93795	0				3
	VYKEMYKTDLEKDIISDTSGDFR	3	2	1	P07355	Y2(Nitro); K3(Glycation); K7(ONE)	3114.45									Low	1.77926	0	3
	EMYKTDLEKDIISDTSGDFRK	1	2	1	P07355	Y3(Nitro); K4(Glycation); K9(Glycation); K21(ONE)	3014.4									Low	1.43451	0	3
P13645	Keratin, type I cytoskeletal 10 OS=Homo sapiens GN=KRT10 PE=1 SV=6 - [K1C10_HUMAN]	71.06	10	48	62	847	925.539	66.61	55	290	823.791	70.38	56	275	887.186	67.12	55	282	584	58.7917	5.21143
	Sequence	# PSMs	# Proteins	# Protein Groups	Protein Group Accessions	Modifications	MH+ [Da]	q-Value	PEP	A2	XCorr A2	Probability A2	B2	XCorr B2	Probability B2	C2	XCorr C2	Probability C2	# Missed Cleavages
	VLDELTLTKADLEMQIESLTEELAYLKK	6	1	1	P13645		3236.72	0	0.00179588	High	8.14938	0	High	6.7089	0	High	7.42533	0	2
	YCVQLSQIQAQISALEEQLQQIRAETECQNTEYQQLLDIK	11	1	1	P13645	C2(Carbamidomethyl); C28(Carbamidomethyl)	4810.37	0	0.00508633	High	7.60814	0	High	6.65882	0	High	6.83055	0	1
	SKELTTEIDNNIEQISSYKSEITELR	5	1	1	P13645		3040.53	0	4.20341e-09	High	7.30766	0	High	6.73029	0	High	6.03369	0	2
	YCVQLSQIQAQISALEEQLQQIR	24	1	1	P13645	C2(Carbamidomethyl)	2746.42	0	1.5424e-07	High	7.10815	0	High	6.43221	0	High	6.60805	0	0
	SKELTTEIDNNIEQISSYKSEITELRR	17	1	1	P13645		3196.63	0	0.000655905	High	7.02825	0	High	6.43501	0	High	6.70137	0	3
	NQILNLTTDNANILLQIDNAR	16	1	1	P13645		2367.26	0	4.96247e-10	High	6.8853	0	High	7.46355	0	High	6.81485	0	0
	VLDELTLTKADLEMQIESLTEELAYLKK	12	1	1	P13645	M14(Oxidation)	3252.72	0	1.0439e-09	High	6.42286	0	High	6.61648	0	High	7.39191	0	2
	TIDDLKNQILNLTTDNANILLQIDNAR	30	1	1	P13645		3052.63	0	1.72534e-07	High	6.40925	0	High	7.07813	0	High	6.74837	0	1
	SKELTTEIDNNIEQISSYK	21	1	1	P13645		2212.1	0	4.5951e-07	High	6.30771	0	High	5.86655	0	High	5.5404	0	1
	AETECQNTEYQQLLDIK	10	1	1	P13645	C5(Carbamidomethyl)	2082.97	0	0.00315092	High	6.20487	0	High	6.22569	0	High	5.93012	0	0
	TIDDLKNQILNLTTDNANILLQIDNAR	6	1	1	P13645	K6(Glycation)	3214.68	0	0.0184241	High	6.12812	0	High	5.08665	0	High	4.66353	0	1
	SKELTTEIDNNIEQISSYKSEITELR	17	1	1	P13645	K19(HNE)	3196.63	0	1.17849e-07	Low	6.07113	0	Low	5.70183	0	Low	6.10796	0	2
	NVQALEIELQSQLALK	44	1	1	P13645		1797.01	0	0.00271908	High	6.01222	0	High	5.38869	0	High	5.66371	0	0
	VLDELTLTKADLEMQIESLTEELAYLK	3	1	1	P13645	M14(Oxidation)	3124.62	0	0.000863213	High	5.98572	0	High	5.07157	0	High	5.93009	0	1
	VLDELTLTKADLEMQIESLTEELAYLK	5	1	1	P13645	K9(Glycation); M14(Oxidation)	3286.67	0	6.11604e-06	High	5.98457	0	High	5.21332	0	High	5.02029	0	1
	RNVQALEIELQSQLALK	9	1	1	P13645		1953.11	0	8.88227e-10	High	5.84362	0	High	6.01763	0	High	6.44435	0	1
	GSSGGGCFGGSSGGYGGLGGFGGGSFR	18	1	1	P13645	C7(Carbamidomethyl)	2342.98	0	1.15253e-08	High	5.8051	0	High	5.95576	0	High	5.84186	0	0
	NVSTGDVNVEMNAAPGVDLTQLLNNMR	13	1	1	P13645		2872.39	0	0.00245612	High	5.78604	0	High	5.47242	0	High	5.83947	0	0
	RVLDELTLTKADLEMQIESLTEELAYLKK	1	1	1	P13645	M15(Oxidation)	3408.82	0	0.00758133	High	5.68349	0							3
	SGGGGGGGGCGGGGGVSSLR	7	1	1	P13645	C10(Carbamidomethyl)	1549.68	0	4.37474e-14	High	5.57853	0	High	5.47087	0	High	5.02611	0	0
	NVQALEIELQSQLALKQSLEASLAETEGR	3	1	1	P13645	K16(Glycation)	3330.73	0	0.00882767	High	5.51427	0	High	5.47122	0	High	5.3382	0	1
	ADLEMQIESLTEELAYLK	19	1	1	P13645	M5(Oxidation)	2112.04	0	2.48345e-06	High	5.46059	0	High	5.73076	0	High	5.82637	0	0
	NVSTGDVNVEMNAAPGVDLTQLLNNMR	25	1	1	P13645	M26(Oxidation)	2888.39	0	0.0140325	High	5.44672	0	High	5.8421	0	High	5.39345	0	0
	ADLEMQIESLTEELAYLK	13	1	1	P13645		2096.05	0	1.35019e-08	High	5.41797	0	High	5.53483	0	High	5.7579	0	0
	NVSTGDVNVEMNAAPGVDLTQLLNNMR	8	1	1	P13645	M11(Oxidation); M26(Oxidation)	2904.38	0	0.0282182	High	5.35885	0	High	4.31263	0	High	4.94275	0	0
	ADLEMQIESLTEELAYLKK	30	1	1	P13645	M5(Oxidation)	2240.14	0	0.00431115	High	5.2273	0	High	4.81231	0	High	5.67157	0	1
	ELTTEIDNNIEQISSYK	25	1	1	P13645		1996.97	0	8.13212e-08	High	4.91776	0	High	4.68755	0	High	4.98436	0	0
	VLDELTLTKADLEMQIESLTEELAYLKK	7	1	1	P13645	K9(Glycation)	3398.78	0	0.0247532	High	4.78857	0	High	4.79082	0	High	4.2509	0	2
	GSLGGGFSSGGFSGGSFSR	15	1	1	P13645		1707.77	0	1.94163e-13	High	4.71042	0	High	4.83749	0	High	4.88946	0	0
	VLDELTLTKADLEMQIESLTEELAYLKK	10	1	1	P13645	K9(Glycation); M14(Oxidation)	3414.77	0	0.000915483	High	4.66279	0	High	4.65619	0	High	4.31396	0	2
	VLDELTLTKADLEMQIESLTEELAYLK	3	1	1	P13645		3108.63	0	9.70599e-08	High	4.61018	0	High	4.51461	0	High	4.66359	0	1
	ADLEMQIESLTEELAYLKK	21	1	1	P13645		2224.14	0	0.000599978	High	4.58924	0	High	5.03703	0	High	4.98536	0	1
	AETECQNTEYQQLLDIKIRLENEIQTYR	7	1	1	P13645	C5(Carbamidomethyl)	3498.72	0	0.018782	High	4.43005	0	High	4.08161	0	High	4.22878	0	2
	SQYEQLAEQNR	11	1	1	P13645		1365.64	0	0.00134026	High	4.2762	0	High	4.23927	0	High	4.39225	0	0
	ELTTEIDNNIEQISSYK	1	1	1	P13645	Y16(Nitro)	2041.96	0	0.00457532	High	4.26426	0							0
	NVQALEIELQSQLALKQSLEASLAETEGR	7	1	1	P13645		3168.68	0	2.25457e-09	High	4.20591	0	High	5.266	0	High	5.36409	0	1
	IRLENEIQTYR	15	1	1	P13645		1434.77	0	0.000262663	High	4.0609	0	High	4.15765	0	High	4.0994	0	1
	ALEESNYELEGK	15	1	1	P13645		1381.65	0	7.72535e-06	High	3.97359	0	High	3.8485	0	High	3.82747	0	0
	ELTTEIDNNIEQISSYKSEITELRR	8	1	1	P13645		2981.51	0	4.52885e-08	High	3.81098	0	High	3.68012	0	High	3.21719	0	2
	LKYENEVALR	16	1	1	P13645		1234.68	0	0.00224099	High	3.77982	0	High	3.48728	0	High	3.49045	0	1
	ALEESNYELEGK	6	1	1	P13645	Y7(Nitro)	1426.63	0	0.0373598	High	3.3941	0	High	3.43526	0	High	3.3305	0	0
	LENEIQTYR	11	1	1	P13645		1165.58	0	0.0401563	High	3.2818	0	High	3.90935	0	High	3.43279	0	0
	VLDELTLTK	16	1	1	P13645		1031.6	0	0.0441756	High	3.23998	0	High	3.30195	0	High	2.95597	0	0
	QSLEASLAETEGR	13	1	1	P13645		1390.68	0	1.43425e-08	High	3.15314	0	High	2.71673	0	High	3.21799	0	0
	KDAEAWFNEK	6	2	1	P13645		1237.59	0	0.000862888	High	3.11075	0	High	3.07664	0	High	2.82756	0	1
	SLLEGEGSSGGGGR	11	1	1	P13645		1262.6	0	0.038096	High	3.07182	0	High	3.22536	0	High	3.10472	0	0
	SQYEQLAEQNRK	12	1	1	P13645		1493.73	0	0.000458962	Medium	2.97916	0	High	3.33715	0	High	3.37141	0	1
	KNHEEEMKDLR	17	1	1	P13645		1428.69	0	0.00109196	High	2.93493	0	High	2.91473	0	High	3.16013	0	2
	DAEAWFNEK	14	4	1	P13645		1109.49	0	0.000767597	High	2.76019	0	High	2.72487	0	High	2.93469	0	0
	VTMQNLNDR	7	7	2	P02533;P13645	M3(Oxidation)	1106.53	0	0.0325054	High	2.71241	0	High	2.844	0	High	2.67082	0	0
	QSVEADINGLR	13	3	1	P13645		1201.62	0	2.43327e-05	High	2.55278	0	High	1.83664	0	High	3.052	0	0
	AETECQNTEYQQLLDIKIR	4	1	1	P13645	C5(Carbamidomethyl)	2352.15	0	0.0169128	High	2.53141	0	High	2.63067	0				1
	LASYLDKVR	9	7	3	P02533;Q04695;P13645		1064.61	0	7.01552e-05	High	2.45328	0	High	2.73174	0	High	2.92151	0	1
	VTMQNLNDR	10	7	2	P02533;P13645		1090.53	0	0.00193949	High	2.43691	0	High	2.50573	0	High	2.48976	0	0
	LAADDFR	12	17	8	O76015;Q92764;P02533;Q04695;P13645;Q15323;Q14532;Q14525		807.4	0	0.00133535	High	2.28148	0	High	2.48472	0	High	2.36499	0	0
	ADLEMQIESLTEELAYLK	3	1	1	P13645	M5(Oxidation); K18(Glycation)	2274.1	0	0.016885	High	2.19777	0	High	2.46859	0	High	2.1291	0	0
	RNVQALEIELQSQLALKQSLEASLAETEGR	1	1	1	P13645		3324.78	0	2.98779e-05							High	5.5573	0	2
	ELTTEIDNNIEQISSYKSEITELR	3	1	1	P13645		2825.42	0	0.000224898							High	3.32423	0	1
	NHEEEMKDLR	15	1	1	P13645		1300.6	0.000475	0.00256001	High	3.02539	0	High	2.49694	0	High	2.83948	0	1
	YENEVALR	3	1	1	P13645		993.5	0.000475	0.00532962	High	2.64994	0	High	2.65109	0	High	2.59067	0	0
	NHEEEMKDLR	11	1	1	P13645	M6(Oxidation)	1316.59	0.000475	0.00978486	Low	1.81052	0	High	2.56769	0	High	2.38825	0	1
	ADLEMQIESLTEELAYLKK	1	1	1	P13645	M5(Oxidation); Y16(Nitro)	2285.12	0.000581	0.00134029				High	2.31646	0				1
	RVLDELTLTK	7	1	1	P13645		1187.7	0.000908	0.00387772	High	2.65327	0	High	2.76319	0	High	2.1494	0	1
	IKEWYEK	10	1	1	P13645		995.52	0.000908	0.00404969	High	2.6069	0	Medium	2.41014	0	High	2.48701	0	1
	HGNSHQGEPR	7	1	1	P13645		1118.51	0.000908	0.006696				High	2.29977	0	High	2.48708	0	0
	VLDELTLTKADLEMQIESLTEELAYLK	1	1	1	P13645	K9(Glycation)	3270.68	0.001394	0.0951993	High	4.50532	0							1
	SEITELR	7	1	1	P13645		847.452	0.002127	0.0376523	High	1.54847	0	High	1.90167	0	High	1.97307	0	0
	QSVEADINGLRR	9	2	1	P13645		1357.72	0.002955	0.0488112	Low	1.60783	0	High	1.78027	0	High	1.73215	0	1
	TIDDLK	8	3	1	P13645		704.383	0.004116	0.046486	Low	1.15045	0	High	1.46564	0	Medium	1.73505	0	0
	LASYLDK	7	8	4	P02533;Q04695;P13645;P35527		809.44	0.00524	0.062535	High	2.20594	0	Low	2.08368	0	Medium	1.96598	0	0
	SEITELRR	11	1	1	P13645		1003.55	0.015703	0.19044	Low	2.14457	0	Low	2.11316	0	Medium	1.97017	0	1
	ADLEMQIESLTEELAYLKK	6	1	1	P13645	M5(Oxidation); K18(Glycation)	2402.19	0.042169	0.411089	Medium	1.98922	0	Low	1.76681	0	Low	1.96346	0	1
	ADLEMQIESLTEELAYLKK	3	1	1	P13645	K18(Glycation)	2386.2	0.05444	0.583657				Low	1.89733	0	Low	1.98751	0	1
	VLDELTLTKADLEMQIESLTEELAYLK	4	1	1	P13645	Y25(Nitro); K27(HNE)	3309.74	0.096905	0.554778	Low	3.11412	0	Low	2.69005	0	Low	2.73385	0	1
	HGNSHQGEPRDYSKYYK	2	1	1	P13645	H1(ONE); R10(MG-H1); Y16(Nitro)	2319.04	0.134437	0.74207							Low	1.59464	0	2
	EWYEK	3	1	1	P13645		754.34	0.194327	1	Low	0.979198	0	Low	0.866269	0	Low	0.86556	0	0
	VTMQNLNDRLASYLDK	3	3	2	P02533;P13645	R9(MG-H1); Y13(Nitro)	1979.94	0.224204	1	Low	1.37383	0	Low	1.8471	0	Low	1.31688	0	1
	YYKTIDDLK	1	1	1	P13645	K3(Glycation)	1320.66	0.366809	1				Low	1.06564	0				1
	SKELTTEIDNNIEQISSYKSEITELR	1	1	1	P13645	Y18(Nitro); K19(ONE)	3239.64	0.763367	1				Low	2.16732	0				2
	YSSSKHYSSSR	2	1	1	P13645	K5(Glycation)	1450.63	0.766658	1				Low	1.15209	0				1
	IKEWYEKHGNSHQGEPRDYSK	1	1	1	P13645	Y5(Nitro); Y19(Nitro); K21(ONE)	2832.28	0.789103	1	Low	1.7759	0							3
	VLDELTLTKADLEMQIESLTEELAYLKK	1	1	1	P13645	K9(HNE); M14(Oxidation)	3408.82			Low	4.22677	0							2
	ELTTEIDNNIEQISSYKSEITELR	7	1	1	P13645	K17(HNE)	2981.51			Low	2.90297	0	Low	3.05	0	Low	2.31468	0	1
	KDAEAWFNEKSK	1	1	1	P13645	K1(ONE); K10(Glycation)	1768.88			Low	1.0047	0							2
	MSVRYSSSK	6	1	1	P13645	M1(Oxidation); R4(MG-H1); Y5(Nitro); K9(Glycation)	1321.55			Low	0.967074	0	Low	0.907121	0	Low	0.746105	0	1
	KNHEEEMKDLR	1	1	1	P13645	M7(Oxidation)	1444.68						Low	1.62087	0				2
	SSSSGSVGESSSKGPRY	1	1	1	P13645	K13(HNE)	1814.88						Low	1.49507	0				2
	YYKTIDDLK	1	1	1	P13645		1158.61						Low	0.963964	0				1
	KDAEAWFNEK	1	2	1	P13645	K1(ONE)	1391.68									Low	1.25049	0	1
	KNHEEEMKDLR	1	1	1	P13645	K1(Glycation); M7(Oxidation); K8(HNE)	1762.84									Low	1.24695	0	2
	NHEEEMKDLR	1	1	1	P13645	M6(Oxidation); K7(HNE)	1472.72									Low	0.804972	0	1
	NHEEEMK	1	6	2	P13645;P02533	H2(HNE); M6(Oxidation); K7(Glycation)	1250.54									Low	0.463868	0	0
P10599	Thioredoxin OS=Homo sapiens GN=TXN PE=1 SV=3 - [THIO_HUMAN]	69.52	1	6	8	18	10.4747	53.33	5	5	9.26961	53.33	5	6	11.5838	58.1	7	7	105	11.7297	4.91943
	Sequence	# PSMs	# Proteins	# Protein Groups	Protein Group Accessions	Modifications	MH+ [Da]	q-Value	PEP	A2	XCorr A2	Probability A2	B2	XCorr B2	Probability B2	C2	XCorr C2	Probability C2	# Missed Cleavages
	LVVVDFSATWCGPCK	4	1	1	P10599	C11(Carbamidomethyl); C14(Carbamidomethyl)	1738.83	0	0.00375358	High	4.53235	0	High	3.83177	0	High	4.5566	0	0
	MIKPFFHSLSEK	2	1	1	P10599	M1(Oxidation)	1479.77	0	0.0361886	High	3.1043	0	High	2.72267	0				0
	VGEFSGANK	3	1	1	P10599		908.447	0	0.0211922	High	2.83807	0	High	2.71517	0	High	2.40141	0	0
	TAFQEALDAAGDK	1	1	1	P10599		1336.64	0	7.06086e-06							High	2.36235	0	0
	LEATINELV	1	1	1	P10599		1001.55	0	0.0017611							High	2.26345	0	0
	CMPTFQFFK	3	1	1	P10599	C1(Carbamidomethyl)	1205.55	0.016656	0.281702	Medium	0.767405	0	Low	0.98601	0	Low	0.870131	0	0
	EKLEATINELV	3	1	1	P10599		1258.69			Low	0.940577	0	Low	0.962759	0	Low	0.87245	0	1
	KGQKVGEFSGANK	1	1	1	P10599	K1(Glycation); K4(Glycation); K13(HNE)	1829.95									Low	0.734806	0	2
P62987	Ubiquitin-60S ribosomal protein L40 OS=Homo sapiens GN=UBA52 PE=1 SV=2 - [RL40_HUMAN]	68.75	4	2	13	37	3.46132	46.88	9	15	4.07982	43.75	7	11	0	55.47	8	11	128	14.719	9.83252
	Sequence	# PSMs	# Proteins	# Protein Groups	Protein Group Accessions	Modifications	MH+ [Da]	q-Value	PEP	A2	XCorr A2	Probability A2	B2	XCorr B2	Probability B2	C2	XCorr C2	Probability C2	# Missed Cleavages
	TLSDYNIQK	3	4	1	P62987		1081.55	0.000972	0.0712101	High	1.82915	0	High	1.64949	0	Low	1.13175	0	0
	TITLEVEPSDTIENVK	2	4	1	P62987		1787.93	0.016034	0.197058	Low	1.63217	0				Medium	1.40376	0	0
	LIFAGK	5	4	1	P62987		648.407	0.157215	0.843184	Low	0.932721	0	Low	0.855326	0	Low	0.917096	0	0
	YNCDKMICRKCYAR	9	1	1	P62987	Y1(Nitro); C3(Carbamidomethyl); K5(ONE); M6(Oxidation); C8(Carbamidomethyl); K10(Glycation); C11(Carbamidomethyl)	2314.99	0.722385	1	Low	1.41352	0	Low	1.20952	0	Low	1.37261	0	3
	YNCDKMICRKCYAR	4	1	1	P62987	Y1(Nitro); C3(Carbamidomethyl); C8(Carbamidomethyl); K10(Glycation); C11(Carbamidomethyl); R14(MG-H1)	2198.93	0.727085	1	Low	1.46602	0				Low	1.34144	0	3
	LHPRAVNCRK	2	1	1	P62987	R4(MG-H1); C8(Carbamidomethyl); R9(MG-H1)	1358.7	0.778355	1	Low	1.37507	0				Low	1.09807	0	2
	QLAQKYNCDKMICR	1	1	1	P62987	K5(Glycation); Y6(Nitro); C8(Carbamidomethyl); C13(Carbamidomethyl)	2034.92			Low	1.13221	0							2
	QLAQKYNCDK	1	1	1	P62987	C8(Carbamidomethyl); K10(ONE)	1421.71			Low	0.964318	0							1
	KCYAR	3	1	1	P62987	C2(Carbamidomethyl); Y3(Nitro)	742.329			Low	0.776652	0	Low	0.801587	0				1
	YNCDKMICR	3	1	1	P62987	Y1(Nitro); C3(Carbamidomethyl); M6(Oxidation); C8(Carbamidomethyl)	1320.51			Low	0.570549	0	Low	0.578972	0	Low	0.63671	0	1
	QLEDGRTLSDYNIQKESTLHLVLRLR	1	4	1	P62987	Y11(Nitro); K15(Glycation); H20(HNE); R24(MG-H1)	3514.83						Low	2.43033	0				3
	CGHTNNLRPK	1	1	1	P62987	C1(Carbamidomethyl)	1196.6						Low	0.963656	0				0
	CGHTNNLRPKK	1	1	1	P62987	C1(Carbamidomethyl); R8(MG-H1)	1378.71									Low	1.59425	0	1
	QLAQKYNCDKMICRK	1	1	1	P62987	K5(ONE); C8(Carbamidomethyl); K10(Glycation); C13(Carbamidomethyl); R14(MG-H1); K15(Glycation)	2488.18									Low	1.35792	0	3
Q15323	Keratin, type I cuticular Ha1 OS=Homo sapiens GN=KRT31 PE=1 SV=3 - [K1H1_HUMAN]	67.55	7	5	28	112	92.8555	64.18	26	37	98.3229	60.1	24	40	87.3086	63.22	25	35	416	47.2071	4.88135
	Sequence	# PSMs	# Proteins	# Protein Groups	Protein Group Accessions	Modifications	MH+ [Da]	q-Value	PEP	A2	XCorr A2	Probability A2	B2	XCorr B2	Probability B2	C2	XCorr C2	Probability C2	# Missed Cleavages
	QVVSSSEQLQSYQAEIIELR	6	3	3	Q15323;Q14525;O76009		2307.18	0	7.53337e-08	High	5.54505	0	High	5.46731	0	High	5.94505	0	0
	YSSQLSQVQSLITNVESQLAEIR	3	2	2	Q15323;Q14525		2593.35	0	0.00384726	High	5.31797	0	High	4.70952	0	High	5.17647	0	0
	TVNALEIELQAQHNLR	7	4	4	Q15323;Q14525;O76011;O76009		1848.99	0	0.00294238	High	5.27328	0	High	5.27836	0	High	5.1644	0	0
	SDLEAQVESLKEELLCLK	7	3	3	Q92764;Q15323;O76009	C16(Carbamidomethyl)	2104.09	0	2.19776e-06	High	4.78628	0	High	5.55747	0	High	5.47496	0	1
	EVEQWFTTQTEELNK	4	1	1	Q15323		1881.89	0	0.00389499	High	3.87871	0	High	3.97679	0	High	3.98445	0	0
	SNHEQEVNTLR	6	1	1	Q15323		1326.64	0	0.000240981	High	3.804	0	High	3.35837	0	High	2.97671	0	0
	QNQEYQVLLDVR	6	6	6	Q92764;Q15323;Q14532;Q14525;O76011;O76009		1504.78	0	0.0143376	High	3.54944	0	High	3.39061	0	High	3.3801	0	0
	LNVEVDAAPTVDLNR	4	1	1	Q15323		1625.85	0	0.000877333	High	3.43206	0	High	3.56309	0	High	3.24546	0	0
	SQQQEPLLCPSYQSYFK	3	3	3	Q15323;Q14525;O76011	C9(Carbamidomethyl)	2102.98	0	5.0854e-07	High	3.306	0	High	4.52988	0	High	4.03487	0	0
	ARLECEINTYR	3	5	5	Q92764;Q15323;Q14525;O76011;O76009	C5(Carbamidomethyl)	1424.69	0	0.00123212	High	3.20094	0	High	3.25462	0	High	3.64587	0	1
	DNAELENLIR	2	3	3	Q15323;Q14525;O76009		1186.61	0	5.0606e-05	High	2.77852	0				High	1.86899	0	0
	LVVQIDNAK	3	3	3	Q15323;Q14525;O76009		999.583	0	0.00134026	High	2.64438	0	High	2.17802	0	High	2.37702	0	0
	DSLENTLTESEAR	4	3	3	Q15323;Q14532;O76009		1464.68	0	0.000224898	High	2.62666	0	High	2.99987	0	High	3.06817	0	0
	ETMQFLNDR	3	8	6	O76015;Q15323;Q14532;Q14525;O76011;O76009		1153.53	0	0.000212221	High	2.51044	0	High	2.38703	0	High	2.50286	0	0
	LAADDFR	12	17	8	O76015;Q92764;P02533;Q04695;P13645;Q15323;Q14532;Q14525		807.4	0	0.00133535	High	2.28148	0	High	2.48472	0	High	2.36499	0	0
	YQTELSLR	3	1	1	Q15323		1009.53	0	0.00150934	High	2.09487	0	High	2.04247	0	High	2.10164	0	0
	ILDELTLCK	2	3	2	Q15323;O76011	C8(Carbamidomethyl)	1104.6	0	9.40417e-06	Low	0.607294	0				High	2.41022	0	0
	SQYEALVETNR	3	2	2	Q15323;O76009		1309.64	0.000567	0.0515989	High	2.04674	0	High	1.35805	0	High	1.86656	0	0
	LECEINTYR	5	5	5	Q92764;Q15323;Q14525;O76011;O76009	C3(Carbamidomethyl)	1197.56	0.000581	0.00184766	Medium	2.0337	0	High	2.9001	0	High	2.02889	0	0
	TIEELQQK	2	6	5	Q15323;Q14532;Q14525;O76011;O76009		988.531	0.000581	0.00187047				High	2.77279	0	Low	0.924083	0	0
	SQYEALVETNRR	6	2	2	Q15323;O76009		1465.74	0.000908	0.00234518	High	2.41052	0	High	2.25542	0	High	2.23179	0	1
	TKYQTELSLR	5	1	1	Q15323		1238.67	0.007542	0.113679	Medium	2.10602	0	High	2.8508	0	Medium	2.24315	0	1
	LASYLEK	4	8	5	Q15323;Q14525;O76011;Q9C075;O76009		823.455	0.013241	0.15557	Medium	2.14324	0	Medium	2.13078	0	Medium	1.92823	0	0
	CQLGDR	3	6	5	Q92764;Q15323;Q14532;Q14525;O76009	C1(Carbamidomethyl)	748.341	0.016312	0.215647	Medium	1.49074	0	Medium	1.30622	0	Medium	1.54173	0	0
	ILCTK	3	6	2	Q15323;Q14532	C3(Carbamidomethyl)	634.359	0.021143	0.286332	Low	1.1719	0	Medium	1.53222	0	Low	1.2593	0	0
	QLVESDINGLRR	1	3	3	Q92764;Q15323;O76009		1399.77	0.140031	0.620624	Low	2.04393	0							1
	QLVESDINGLR	1	3	3	Q92764;Q15323;O76009		1243.66			Low	0.787617	0							0
	VLNETR	1	1	1	Q15323		731.403						Low	0.731977	0				0
P35527	Keratin, type I cytoskeletal 9 OS=Homo sapiens GN=KRT9 PE=1 SV=3 - [K1C9_HUMAN]	66.77	1	25	33	120	110.664	55.54	27	44	98.0564	56.02	23	39	83.5101	50.56	26	37	623	62.0268	5.23682
	Sequence	# PSMs	# Proteins	# Protein Groups	Protein Group Accessions	Modifications	MH+ [Da]	q-Value	PEP	A2	XCorr A2	Probability A2	B2	XCorr B2	Probability B2	C2	XCorr C2	Probability C2	# Missed Cleavages
	GGSGGSHGGGSGFGGESGGSYGGGEEASGSGGGYGGGSGK	2	1	1	P35527		3223.28	0	1.82968e-17	High	7.11047	0	High	7.60815	0				0
	DIENQYETQITQIEHEVSSSGQEVQSSAK	6	1	1	P35527		3264.51	0	0.00169252	High	6.63681	0	High	6.44866	0	High	6.73108	0	0
	NYSPYYNTIDDLKDQIVDLTVGNNK	4	1	1	P35527		2902.41	0	0.00256744	High	5.06273	0	High	3.79652	0	High	2.10391	0	1
	GGSGGSYGGGGSGGGYGGGSGSR	4	1	1	P35527		1791.73	0	6.00964e-05	High	4.85735	0	High	4.36737	0	High	4.35286	0	0
	LASYLDKVQALEEANNDLENK	4	1	1	P35527		2377.19	0	0.00265325	High	4.78766	0	High	4.58805	0	High	4.09343	0	1
	QEIECQNQEYSLLLSIK	5	1	1	P35527	C5(Carbamidomethyl)	2095.04	0	0.00195606	High	4.6457	0	High	4.8935	0	High	4.84806	0	0
	YCGQLQMIQEQISNLEAQITDVR	1	1	1	P35527	C2(Carbamidomethyl)	2737.33	0	0.00392978	High	4.51502	0							0
	VQALEEANNDLENK	3	1	1	P35527		1586.77	0	0.00143068	High	4.4832	0	High	3.95667	0	High	3.82406	0	0
	HGVQELEIELQSQLSK	2	1	1	P35527		1837.97	0	0.0120498	High	3.78702	0							0
	SGGGGGGGLGSGGSIR	5	1	1	P35527		1232.6	0	0.00857809	High	3.3846	0	High	4.14775	0	High	4.20657	0	0
	FSSSSGYGGGSSR	3	1	1	P35527		1235.53	0	8.06729e-07	High	2.71873	0	High	2.95535	0	High	2.45142	0	0
	TLLDIDNTR	4	1	1	P35527		1060.56	0	4.03312e-05	High	2.42837	0	High	2.46402	0	High	2.89829	0	0
	FSSSGGGGGGGR	3	1	1	P35527		982.434	0	1.11338e-06	High	2.29733	0	High	2.55779	0	High	2.73768	0	0
	SDLEMQYETLQEELMALKK	7	1	1	P35527	M5(Oxidation); M15(Oxidation)	2331.11	0	0.000445016	High	2.1567	0	High	2.38859	0	High	2.61658	0	1
	IKFEMEQNLR	7	1	1	P35527	M5(Oxidation)	1323.67	0	0.000791969	Low	1.86498	0	Low	1.82421	0	High	2.20859	0	1
	HGVQELEIELQSQLSKK	2	1	1	P35527		1966.06	0	8.08392e-10	Low	1.47303	0				High	4.86182	0	1
	GGGGSFGYSYGGGSGGGFSASSLGGGFGGGSR	3	1	1	P35527		2705.16	0	4.90485e-09				High	5.51165	0	High	6.658	0	0
	EIETYHNLLEGGQEDFESSGAGK	1	1	1	P35527		2510.13	0	0.00056184				High	4.13625	0				0
	SDLEMQYETLQEELMALKK	4	1	1	P35527		2299.12	0.000475	0.00308602	High	2.50041	0	High	2.17479	0	High	2.45359	0	1
	STMQELNSR	3	1	1	P35527		1065.5	0.000475	0.00399819	High	2.28412	0	High	2.252	0	High	2.39745	0	0
	QGVDADINGLR	4	1	1	P35527		1157.59	0.000475	0.00939938	High	2.27874	0				High	1.77355	0	0
	QVLDNLTMEK	2	1	1	P35527	M8(Oxidation)	1206.6	0.000475	0.00504731	Low	1.40567	0				High	2.16247	0	0
	STMQELNSR	3	1	1	P35527	M3(Oxidation)	1081.5	0.000581	0.00134026	High	2.60739	0	High	2.68313	0	High	2.41348	0	0
	IKFEMEQNLR	5	1	1	P35527		1307.68	0.000972	0.0686119	High	3.12039	0	High	2.06737	0	High	2.61181	0	1
	IQDWYDKK	3	1	1	P35527		1095.55	0.002923	0.146461	High	2.56877	0	Low	1.89977	0	Low	1.66812	0	1
	TLNDMRQEYEQLIAK	2	1	1	P35527	M5(Oxidation)	1867.92	0.002923	0.141425	High	1.65791	0	Low	1.13456	0				1
	LASYLDK	7	8	4	P02533;Q04695;P13645;P35527		809.44	0.00524	0.062535	High	2.20594	0	Low	2.08368	0	Medium	1.96598	0	0
	MTLDDFR	3	1	1	P35527	M1(Oxidation)	913.408	0.007433	0.0907143	Low	1.84443	0	High	1.60825	0	Medium	1.82949	0	0
	SLEDTK	3	2	2	Q03001;P35527		692.346	0.009306	0.214751	High	1.14217	0	Low	1.39467	0	Medium	1.38109	0	0
	MTLDDFR	3	1	1	P35527		897.413	0.01063	0.231241	Medium	1.40773	0	Medium	1.61599	0	Medium	1.43978	0	0
	QEYEQLIAK	1	1	1	P35527		1121.58	0.025108	0.348949	Medium	1.04371	0							0
	EVTQLR	1	1	1	P35527		745.42	0.069413	0.484411	Low	1.68611	0							0
	FSSSGGGGGGGRFSSSSGYGGGSSR	1	1	1	P35527		2198.93	0.771449	1							Low	1.09595	0	1
	IGLGGRGGSGGSYGR	2	1	1	P35527	Y13(Nitro)	1395.66	0.790841	1				Low	0.831867	0	Low	1.14117	0	1
	MTLDDFRIK	2	1	1	P35527	R7(MG-H1)	1192.61			Low	1.24528	0	Low	1.15718	0				1
	IKFEMEQNLR	1	1	1	P35527	M5(Oxidation); R10(MG-H1)	1377.67			Low	0.91417	0							1
	TLNDMRQEYEQLIAK	1	1	1	P35527		1851.93						Low	1.82166	0				1
	TLNDMR	1	1	1	P35527		749.361									Low	0.949442	0	0
	MTLDDFRIK	1	1	1	P35527	M1(Oxidation); R7(MG-H1)	1208.6									Low	0.798441	0	1
	NYSPYYNTIDDLK	1	1	1	P35527	Y2(Nitro); Y5(Nitro); Y6(Nitro)	1740.71									Low	0.531446	0	0
Q08188	Protein-glutamine gamma-glutamyltransferase E OS=Homo sapiens GN=TGM3 PE=1 SV=4 - [TGM3_HUMAN]	66.52	1	32	45	164	153.371	59.6	39	58	137.318	60.89	39	60	114.573	59.88	35	46	693	76.5836	5.85889
	Sequence	# PSMs	# Proteins	# Protein Groups	Protein Group Accessions	Modifications	MH+ [Da]	q-Value	PEP	A2	XCorr A2	Probability A2	B2	XCorr B2	Probability B2	C2	XCorr C2	Probability C2	# Missed Cleavages
	DIILDNPTLTLEVLNEAR	6	1	1	Q08188		2039.1	0	8.44099e-10	High	6.35069	0	High	6.4293	0	High	6.23331	0	0
	LKPNTPFAATSSMGLETEEQEPSIIGK	3	1	1	Q08188	M13(Oxidation)	2891.43	0	4.10376e-07	High	5.90526	0	High	5.79105	0	High	5.8441	0	0
	SDLGPSYGGWQVLDATPQER	7	1	1	Q08188		2176.03	0	1.71337e-06	High	5.46483	0	High	5.54683	0	High	5.42022	0	0
	YGQCWVFAGTLNTALR	5	1	1	Q08188	C4(Carbamidomethyl)	1856.91	0	8.82026e-08	High	5.28579	0	High	5.01653	0	High	4.17612	0	0
	EGDVQLNFDMPFIFAEVNADR	6	1	1	Q08188		2427.13	0	8.68692e-06	High	4.88531	0	High	4.62112	0	High	4.38833	0	0
	NLSVDVYYDPMGNPLDK	3	1	1	Q08188	M11(Oxidation)	1955.91	0	0.00228293	High	4.85886	0	High	4.81723	0	High	3.94671	0	0
	DCVLMVEGSGLLLGNLK	3	1	1	Q08188	C2(Carbamidomethyl); M5(Oxidation)	1833.94	0	0.00210881	High	4.81688	0	High	4.78248	0	High	4.86962	0	0
	SQGVFQCGPASVIGVR	5	1	1	Q08188	C7(Carbamidomethyl)	1661.84	0	0.017924	High	4.50779	0	High	4.74302	0	High	4.58396	0	0
	EGDVQLNFDMPFIFAEVNADR	4	1	1	Q08188	M10(Oxidation)	2443.12	0	6.05703e-05	High	4.49566	0	High	4.01943	0	High	4.09087	0	0
	EEYVQEDAGIIFVGSTNR	5	1	1	Q08188		2026.97	0	3.82161e-10	High	4.48932	0	High	4.8641	0	High	4.35608	0	0
	LEFIVSTGPYPSESAMTK	3	1	1	Q08188	M16(Oxidation)	1972.96	0	7.51454e-08	High	3.94941	0	High	4.12756	0	High	4.01993	0	0
	DSATMSLDPEEEAEHPIK	3	1	1	Q08188		1998.9	0	0.0121835	High	3.76651	0	Low	1.91238	0				0
	GQNFQVLMIMNK	3	1	1	Q08188		1422.72	0	5.16742e-06	High	3.24701	0	High	2.50718	0	High	3.2865	0	0
	GSDSVWNFHVWNEGWFVR	4	1	1	Q08188		2222.02	0	0.00307591	High	3.18217	0	High	2.26299	0	High	1.5142	0	0
	DSATMSLDPEEEAEHPIK	5	1	1	Q08188	M5(Oxidation)	2014.89	0	0.0216209	High	3.17306	0	High	2.7678	0	High	2.58346	0	0
	LEFIVSTGPYPSESAMTK	3	1	1	Q08188		1956.96	0	0.0120085	High	3.17064	0	High	3.55945	0	High	3.71962	0	0
	DCVLMVEGSGLLLGNLK	2	1	1	Q08188	C2(Carbamidomethyl)	1817.95	0	8.20611e-05	High	3.01236	0				High	3.52765	0	0
	FSSQELILR	3	1	1	Q08188		1092.6	0	0.000135296	High	2.9278	0	High	2.86523	0	High	2.573	0	0
	VITNFNSAHDTDR	3	1	1	Q08188		1489.7	0	1.6208e-07	High	2.89195	0	High	2.82265	0	High	3.6972	0	0
	VPDESEVVVER	8	1	1	Q08188		1257.63	0	0.0144695	High	2.57753	0	High	2.38778	0	High	2.63081	0	0
	VAGMLAVGK	3	1	1	Q08188	M4(Oxidation)	861.486	0	0.00121205	High	2.47359	0	High	2.92343	0	High	2.76339	0	0
	QLLADFSCNKFPAIK	6	1	1	Q08188	C8(Carbamidomethyl)	1751.92	0	3.65204e-05	Medium	2.37059	0	High	3.88156	0	High	3.72076	0	1
	FDILPSR	3	1	1	Q08188		847.467	0	0.000606959	High	2.32406	0	High	2.01552	0	High	2.18862	0	0
	YPEGSDQER	3	1	1	Q08188		1080.46	0	0.00135382	High	2.31296	0	High	2.15905	0	High	2.25099	0	0
	EVNLVLLLK	4	1	1	Q08188		1040.67	0	3.45437e-06	High	2.30504	0	High	2.09008	0	High	2.18182	0	0
	YTMALQIFSQGGISSVK	1	1	1	Q08188		1829.95	0	6.71758e-05							High	2.87766	0	0
	QAHHTDKFSSQELILR	4	1	1	Q08188		1909.99	0.000475	0.0100895	High	3.35564	0	High	2.49643	0	High	1.95577	0	1
	DAATDVASR	3	1	1	Q08188		905.432	0.000475	0.00466185	High	2.30848	0	High	2.29596	0	High	2.27342	0	0
	LKPNTPFAATSSMGLETEEQEPSIIGK	1	1	1	Q08188		2875.44	0.000567	0.0529865	High	3.3773	0							0
	NSVNSHTIGR	2	1	1	Q08188		1084.55	0.000581	0.00169004	High	2.55846	0	High	2.85856	0				0
	YKYPEGSDQER	4	1	1	Q08188		1371.62	0.000908	0.0122445	High	2.19509	0	High	1.82687	0	Medium	1.89383	0	1
	RGQNFQVLMIMNK	2	1	1	Q08188		1578.82	0.000972	0.0841917	High	3.51521	0	Medium	3.19147	0				1
	VRFDILPSR	6	1	1	Q08188		1102.64	0.00136	0.0135193	High	2.66381	0	High	3.02451	0	High	2.56468	0	1
	SDNMIR	1	1	1	Q08188	M4(Oxidation)	751.34	0.003554	0.179506	High	1.68283	0							0
	IDVPTLGPK	3	1	1	Q08188		939.551	0.005574	0.0661473	High	1.58371	0	High	1.58453	0	Medium	1.59118	0	0
	SGFSPVR	3	1	1	Q08188		749.394	0.012683	0.139499	Medium	1.09315	0	Medium	1.35509	0	Medium	1.61941	0	0
	QLLADFSCNK	3	1	1	Q08188	C8(Carbamidomethyl)	1195.58	0.02536	0.352814	Low	1.13342	0	Medium	1.18632	0	Low	0.84545	0	0
	SLGIPSR	2	1	1	Q08188		729.425	0.051021	0.441161	Low	1.14744	0	Low	1.10087	0				0
	SLNFR	3	1	1	Q08188		636.346	0.068278	0.777126	Low	1.06765	0	Low	0.838174	0	Low	0.767785	0	0
	YISTK	3	1	1	Q08188		611.34	0.104006	0.958344	Low	1.11112	0	Low	1.01624	0	Low	0.949266	0	0
	ITWLYDNTTGK	1	1	1	Q08188		1311.66	0.146046	0.62913	Low	0.963173	0							0
	GLGSNER	3	1	1	Q08188		732.364	0.167009	0.916065	Low	0.888416	0	Low	0.695749	0	Low	1.02294	0	0
	YLKSDNMIR	4	1	1	Q08188		1139.58	0.259752	1	Low	0.822666	0	Low	1.076	0	Low	1.39492	0	1
	KSGFSPVR	1	1	1	Q08188		877.489	0.28752	0.803007	Low	1.71938	0							1
	QVFQK	1	1	1	Q08188		649.367	0.369835	1							Low	1.08241	0	0
	QWKNSVNSHTIGR	4	1	1	Q08188	H9(ONE)	1680.87	0.525752	1	Low	1.63055	0	Low	1.84416	0				1
	NWKKSGFSPVRYGQCWVFAGTLNTALR	1	1	1	Q08188	R11(MG-H1); C15(Carbamidomethyl)	3197.62						Low	2.33233	0				3
	VITNFNSAHDTDR	1	1	1	Q08188	R13(MG-H1)	1543.7						Low	1.20673	0				0
	AVGSNAR	1	1	1	Q08188		674.358						Low	0.812108	0				0
	SWNGSVEILK	1	1	1	Q08188		1132.6						Low	0.75137	0				0
	YLKSDNMIR	1	1	1	Q08188	Y1(Nitro); M7(Oxidation); R9(MG-H1)	1254.57						Low	0.665737	0				1
	AVGSNARMDVTDKYKYPEGSDQER	1	1	1	Q08188	R7(MG-H1)	2770.27									Low	1.9255	0	3
Q8N1N4	Keratin, type II cytoskeletal 78 OS=Homo sapiens GN=KRT78 PE=2 SV=2 - [K2C78_HUMAN]	65.38	15	23	37	133	81.7095	59.42	31	43	86.8244	63.27	34	51	74.477	51.92	29	39	520	56.8305	6.02393
	Sequence	# PSMs	# Proteins	# Protein Groups	Protein Group Accessions	Modifications	MH+ [Da]	q-Value	PEP	A2	XCorr A2	Probability A2	B2	XCorr B2	Probability B2	C2	XCorr C2	Probability C2	# Missed Cleavages
	WHLLQQQGLSGSQQGLEPVFEACLDQLR	1	1	1	Q8N1N4	C23(Carbamidomethyl)	3237.61	0	0.00106143	High	5.12732	0							0
	FGEWSGGPGLSLCPPGGIQEVTINQNLLTPLK	3	1	1	Q8N1N4	C13(Carbamidomethyl)	3379.74	0	6.75331e-05	High	4.89513	0	High	4.71637	0	High	4.98095	0	0
	WHLLQQQGLSGSQQGLEPVFEACLDQLRK	4	1	1	Q8N1N4	C23(Carbamidomethyl)	3365.71	0	2.06325e-05	High	4.66515	0	High	4.28304	0	High	4.71958	0	1
	HLNEEELGQLQTQASDTSVVLSMDNNR	2	1	1	Q8N1N4	M23(Oxidation)	3044.42	0	3.33528e-08	High	4.51749	0	High	5.19104	0				0
	VQISQLHQEIQR	6	1	1	Q8N1N4		1478.81	0	4.35922e-08	High	4.20229	0	High	4.56625	0	High	4.38499	0	0
	YLDFSSIITEVR	3	1	1	Q8N1N4		1442.75	0	0.00448305	High	4.17579	0	High	3.07819	0	High	3.47081	0	0
	YQELQVSAQLHGDR	3	1	1	Q8N1N4		1643.81	0	1.35003e-06	High	3.87647	0	High	4.38966	0	High	4.43917	0	0
	QNASLQAAITDAEQR	3	1	1	Q8N1N4		1615.8	0	1.4221e-09	High	3.83368	0	High	4.07919	0	High	3.78559	0	0
	AEAEALYQTK	3	6	2	Q86Y46;Q8N1N4		1123.56	0	0.0458966	High	3.51423	0	High	3.81684	0	High	3.23532	0	0
	VDELEAALR	3	1	1	Q8N1N4		1015.54	0	0.0269958	High	3.50281	0	High	3.55181	0	High	3.54675	0	0
	LLCEYQELTSTK	3	1	1	Q8N1N4	C3(Carbamidomethyl)	1484.73	0	0.00035995	High	3.24463	0	High	2.49321	0	High	2.95776	0	0
	ATLENDFVVLKK	6	1	1	Q8N1N4		1376.78	0	0.0336829	High	2.98139	0	High	3.16712	0	High	2.68615	0	1
	QLEQLQGER	3	1	1	Q8N1N4		1100.57	0	0.00234638	High	2.74091	0	High	2.36923	0	High	2.51659	0	0
	IEIDPQFQVVR	3	1	1	Q8N1N4		1343.73	0	4.04486e-06	High	2.50028	0	High	2.65485	0	High	2.75076	0	0
	SLNSFGGCLEGSR	3	1	1	Q8N1N4	C8(Carbamidomethyl)	1383.63	0	5.70626e-05	High	2.18818	0	High	1.44288	0	High	2.49847	0	0
	SSKAEAEALYQTK	1	1	1	Q8N1N4		1425.72	0	2.60795e-05							High	3.38161	0	1
	TQETQEIR	3	1	1	Q8N1N4		1004.5	0.000475	0.00973412	High	2.97318	0	High	2.79628	0	High	2.7023	0	0
	GALDAELK	4	1	1	Q8N1N4		816.447	0.000475	0.00745036	High	2.31492	0	High	2.25618	0	High	2.31544	0	0
	LQSQTENLK	3	1	1	Q8N1N4		1060.56	0.000475	0.00640077	High	1.68717	0	High	2.40593	0	High	2.48804	0	0
	LLEGEECR	6	11	5	Q86Y46;P35908;P13647;P02538;Q8N1N4	C7(Carbamidomethyl)	1005.47	0.000475	0.00912091	Medium	1.01541	0	High	2.75621	0	High	2.81535	0	0
	KQLEQLQGER	5	1	1	Q8N1N4		1228.66	0.000908	0.00187047	Medium	2.63004	0	High	2.59207	0	Medium	2.74315	0	1
	LQSQTENLKK	6	1	1	Q8N1N4		1188.66	0.000908	0.00224941	Medium	2.44475	0	High	2.84331	0	High	2.18101	0	1
	FLEQQNK	6	18	6	Q5XKE5;Q8N1N4;P13647;P02538;P78386;O43790		906.468	0.000908	0.00543583	High	1.7396	0	High	1.82447	0	Medium	1.75315	0	0
	EYLYFLK	2	1	1	Q8N1N4		975.519	0.001803	0.0160406	Medium	1.03643	0	High	1.33675	0				0
	DVDGVFLSK	3	1	1	Q8N1N4		979.51	0.003348	0.0520064	Medium	1.6902	0	High	1.7181	0	High	1.69279	0	0
	RLLEGEECR	3	1	1	Q8N1N4	C8(Carbamidomethyl)	1161.57	0.007542	0.107867	Medium	2.16901	0	Medium	2.12118	0	High	2.54893	0	1
	GELALK	3	6	3	Q5XKE5;Q8N1N4;P13647		630.382	0.008756	0.117968	Low	0.651752	0	High	1.84857	0	Medium	1.3124	0	0
	LEALR	1	15	2	Q8N1N4;Q6NXR0		601.367	0.011998	0.163705				Medium	1.33732	0				0
	ARYEEIAR	1	1	1	Q8N1N4		1007.53	0.100526	0.561892	Low	1.78005	0							1
	ATLENDFVVLK	3	1	1	Q8N1N4		1248.68	0.158765	1				Low	1.21873	0	Low	1.51023	0	0
	QNLAR	1	1	1	Q8N1N4		601.342	0.397198	1				Low	1.09865	0				0
	ACRDQEEEYKSKYEEEAHR	6	1	1	Q8N1N4	C2(Carbamidomethyl); Y13(Nitro)	2502.05	0.723487	1	Low	1.10118	0	Low	1.14846	0	Low	0.885189	0	3
	DQEEEYK	8	1	1	Q8N1N4	Y6(Nitro); K7(Glycation)	1147.44	0.764243	1	Low	0.615841	0	Low	0.834432	0	Low	0.786851	0	0
	SKYEEEAHRR	9	1	1	Q8N1N4	R9(MG-H1)	1358.65			Low	1.45331	0	Low	1.56229	0	Low	1.46911	0	2
	SKYEEEAHR	4	1	1	Q8N1N4	H8(HNE); R9(MG-H1)	1358.65			Low	1.01863	0	Low	1.42136	0	Low	0.98315	0	1
	DQEEEYK	3	1	1	Q8N1N4	Y6(Nitro)	985.373			Low	0.600918	0	Low	0.422894	0	Low	0.615317	0	0
	MELEGKLEALR	1	1	1	Q8N1N4	M1(Oxidation); K6(Glycation)	1466.75						Low	1.31011	0				1
	TLNNQFASFIDK	1	1	1	Q8N1N4		1397.71						Low	1.30042	0				0
	VDELEAALR	1	1	1	Q8N1N4	R9(MG-H1)	1069.55									Low	1.03258	0	0
P13647	Keratin, type II cytoskeletal 5 OS=Homo sapiens GN=KRT5 PE=1 SV=3 - [K2C5_HUMAN]	63.05	3	33	62	422	260.149	60.85	57	141	292.401	62.88	59	142	246.317	60.68	57	139	590	62.34	7.73779
	Sequence	# PSMs	# Proteins	# Protein Groups	Protein Group Accessions	Modifications	MH+ [Da]	q-Value	PEP	A2	XCorr A2	Probability A2	B2	XCorr B2	Probability B2	C2	XCorr C2	Probability C2	# Missed Cleavages
	MFFDAELSQMQTHVSDTSVVLSMDNNR	2	1	1	P13647	M1(Oxidation); M10(Oxidation); M23(Oxidation)	3150.38	0	0.00192484	High	4.93508	0	High	4.72519	0				0
	VSLAGACGVGGYGSR	3	1	1	P13647	C7(Carbamidomethyl)	1410.68	0	0.00523521	High	4.92419	0	High	4.68075	0	High	4.28214	0	0
	MFFDAELSQMQTHVSDTSVVLSMDNNR	4	1	1	P13647		3102.4	0	0.00671347	High	4.92273	0	High	4.83668	0	High	5.32247	0	0
	MFFDAELSQMQTHVSDTSVVLSMDNNR	2	1	1	P13647	M1(Oxidation); M10(Oxidation)	3134.39	0	0.00951354	High	4.36933	0							0
	DVDAAYMNKVELEAK	3	2	1	P13647		1695.83	0	0.00983077	High	4.25691	0	High	4.11607	0	High	4.17438	0	1
	NLDLDSIIAEVK	23	7	4	Q5XKE5;P02538;P35908;P13647		1329.73	0	3.27487e-05	High	4.11003	0	High	4.02615	0	High	4.23221	0	0
	SFSTASAITPSVSR	3	1	1	P13647		1410.72	0	0.00566824	High	4.06227	0	High	3.29202	0	High	3.55059	0	0
	NKLAELEEALQK	6	1	1	P13647		1385.76	0	0.0204479	High	4.01232	0	High	3.89827	0	High	3.8124	0	1
	NMQDLVEDFKNKYEDEINKR	8	1	1	P13647		2528.21	0	0.00134026	High	3.97074	0	High	4.47634	0	High	4.53221	0	3
	NMQDLVEDFKNKYEDEINK	22	1	1	P13647	K19(HNE)	2528.21	0	2.33659e-07	High	3.96576	0	High	4.44785	0	High	4.50371	0	2
	QNLEPLFEQYINNLR	11	4	2	P02538;P13647		1890.97	0	5.81209e-07	High	3.82241	0	High	4.13384	0	High	4.02229	0	0
	LALDVEIATYRK	6	9	4	Q5XKE5;P02538;P35908;P13647		1391.79	0	9.95429e-06	High	3.76735	0	High	3.4551	0	High	3.70407	0	1
	NTKHEISEMNR	6	1	1	P13647		1358.65	0	0.0149485	High	3.69154	0	High	3.89167	0	High	3.66794	0	1
	TTAENEFVMLKK	7	1	1	P13647		1410.73	0	0.0111541	High	3.55197	0	High	3.76825	0	High	3.23663	0	1
	QCANLQNAIADAEQR	7	1	1	P13647	C2(Carbamidomethyl)	1701.8	0	7.21436e-10	High	3.51441	0	High	4.08609	0	High	3.58027	0	0
	TTAENEFVMLKK	6	1	1	P13647	M9(Oxidation)	1426.72	0	7.96659e-06	High	3.45987	0	High	2.90029	0	High	3.41033	0	1
	YEELQQTAGR	8	1	1	P13647		1194.57	0	0.000381232	High	3.42838	0	High	3.5155	0	High	3.57202	0	0
	VDALMDEINFMK	3	1	1	P13647	M5(Oxidation); M11(Oxidation)	1457.67	0	0.019369	High	3.42191	0	High	3.72331	0	High	3.80249	0	0
	RQLDSIVGER	4	3	2	P02538;P13647		1172.64	0	4.86656e-05	Medium	3.40622	0	High	3.52988	0	High	3.75142	0	1
	LRAEIDNVKK	6	1	1	P13647		1185.7	0	0.000875619	High	3.32111	0	High	3.24649	0	High	3.73269	0	2
	SRTEAESWYQTK	3	1	1	P13647		1485.7	0	0.00133023	High	3.21132	0	High	3.40713	0	High	2.90748	0	1
	TTAENEFVMLK	3	1	1	P13647	M9(Oxidation)	1298.63	0	0.00109507	High	3.19797	0	High	2.78133	0	High	2.71539	0	0
	LALDVEIATYR	22	9	4	Q5XKE5;P02538;P35908;P13647		1263.69	0	1.56047e-06	High	3.19496	0	High	3.52527	0	High	2.82344	0	0
	KLLEGEECR	11	10	4	Q86Y46;P35908;P13647;P02538	C8(Carbamidomethyl)	1133.56	0	2.98562e-05	High	3.10567	0	High	3.10723	0	High	3.06207	0	1
	VDALMDEINFMK	8	1	1	P13647	M5(Oxidation)	1441.67	0	9.96598e-06	High	2.91748	0	High	3.42461	0	High	2.98502	0	0
	LAELEEALQK	3	1	1	P13647		1143.63	0	6.87821e-07	High	2.84913	0	High	2.71154	0	High	2.72724	0	0
	NMQDLVEDFKNKYEDEINKR	3	1	1	P13647	M2(Oxidation)	2544.2	0	0.000107667	High	2.76413	0				High	3.6024	0	3
	VDALMDEINFMK	4	1	1	P13647		1425.68	0	8.18085e-05	High	2.75862	0	High	2.88549	0	High	2.13896	0	0
	DVDAAYMNKVELEAK	7	2	1	P13647	M7(Oxidation)	1711.82	0	0.000825292	High	2.69306	0	High	4.02026	0	High	4.17812	0	1
	AQYEEIANR	4	1	1	P13647		1093.53	0	0.000443638	High	2.62949	0	High	2.74914	0	High	2.68803	0	0
	QCANLQNAIADAEQRGELALK	3	1	1	P13647	C2(Carbamidomethyl)	2313.16	0	0.000617874	High	2.58926	0	High	2.49818	0	High	3.03779	0	1
	ISISTSGGSFR	6	1	1	P13647		1111.57	0	0.020941	High	2.57313	0	High	2.67976	0	High	2.56058	0	0
	SGGGGGGGFGR	3	1	1	P13647		865.391	0	1.01019e-05	High	2.55678	0	High	2.7859	0	High	2.88356	0	0
	DVDAAYMNK	3	6	2	P02538;P13647		1026.46	0	4.30675e-05	High	2.47167	0	High	2.33282	0	High	2.99774	0	0
	WTLLQEQGTK	4	4	2	P02538;P13647		1203.64	0	0.039385	High	2.42483	0	High	2.08266	0	High	1.84262	0	0
	NMQDLVEDFK	3	1	1	P13647		1238.57	0	1.86784e-06	High	2.31972	0	High	2.59985	0	High	2.86618	0	0
	NMQDLVEDFK	5	1	1	P13647	M2(Oxidation)	1254.57	0	0.00135726	High	1.96731	0	High	1.75869	0	High	2.42596	0	0
	MFFDAELSQMQTHVSDTSVVLSMDNNR	3	1	1	P13647	M1(Oxidation)	3118.39	0	3.15506e-09				High	5.07255	0				0
	KQCANLQNAIADAEQR	1	1	1	P13647	C3(Carbamidomethyl)	1829.89	0	1.1021e-08							High	3.99712	0	1
	NKYEDEINKR	29	6	3	P02538;P13647;P04264		1308.65	0.000475	0.0090096	High	3.33335	0	High	3.31484	0	High	3.44097	0	2
	NMQDLVEDFKNKYEDEINK	5	1	1	P13647	M2(Oxidation); K19(HNE)	2544.2	0.000475	0.00437031	High	2.7183	0				High	3.5987	0	2
	DVDAAYMNK	3	6	2	P02538;P13647	M7(Oxidation)	1042.45	0.000475	0.00265674	High	2.51	0	High	2.33104	0	High	2.48621	0	0
	HEISEMNR	3	1	1	P13647		1015.46	0.000475	0.00260446	High	2.45228	0	High	2.7003	0	High	2.34797	0	0
	KDVDAAYMNK	3	6	2	P02538;P13647		1154.55	0.000475	0.00411206	High	2.19267	0	High	2.73117	0	High	2.12823	0	1
	QLDSIVGER	3	3	2	P02538;P13647		1016.54	0.000475	0.00271744	High	1.58587	0	High	1.76322	0	High	1.83887	0	0
	QNLEPLFEQYINNLRR	3	4	2	P02538;P13647		2047.07	0.000475	0.00862325	High	1.4969	0	High	1.20342	0	High	1.34871	0	1
	LLEGEECR	6	11	5	Q86Y46;P35908;P13647;P02538;Q8N1N4	C7(Carbamidomethyl)	1005.47	0.000475	0.00912091	Medium	1.01541	0	High	2.75621	0	High	2.81535	0	0
	TEAESWYQTK	3	1	1	P13647		1242.56	0.000567	0.0604424	High	2.43471	0	High	2.13654	0	Medium	1.99723	0	0
	LRAEIDNVK	4	1	1	P13647		1057.6	0.000581	0.00187047	High	2.62252	0	High	2.97283	0	Medium	2.46409	0	1
	YEDEINK	3	12	6	Q5XKE5;Q7Z794;P02538;P35908;P13647;P04264		910.415	0.000908	0.00194671	High	2.10795	0	High	1.73702	0	High	2.20207	0	0
	FASFIDK	11	18	6	Q5XKE5;Q86Y46;Q7Z794;P02538;P35908;P13647		827.43	0.000908	0.00554679	High	2.00992	0	High	2.01274	0	High	1.94041	0	0
	FLEQQNK	6	18	6	Q5XKE5;Q8N1N4;P13647;P02538;P78386;O43790		906.468	0.000908	0.00543583	High	1.7396	0	High	1.82447	0	Medium	1.75315	0	0
	YEDEINKR	13	11	5	Q7Z794;P02538;P35908;P13647;P04264		1066.52	0.000923	0.0133839	High	2.33296	0	High	2.2038	0	High	2.16838	0	1
	NKYEDEINK	6	7	4	Q5XKE5;P02538;P13647;P04264		1152.55	0.000923	0.012373	High	2.12815	0	High	1.75297	0	High	2.5497	0	1
	FASFIDKVR	5	17	6	Q5XKE5;Q86Y46;Q7Z794;P02538;P35908;P13647		1082.6	0.001394	0.105287	High	2.09797	0	High	1.51442	0	High	1.83712	0	1
	TSFTSVSR	2	1	1	P13647		884.447	0.001394	0.10281	High	2.08584	0	High	2.13835	0				0
	AEIDNVKK	6	1	1	P13647		916.51	0.001821	0.0150533	High	2.65991	0	High	2.17296	0	High	1.86151	0	1
	SLYNLGGSK	3	1	1	P13647		938.494	0.002127	0.0212461	Medium	1.95588	0	High	1.88746	0	High	2.12296	0	0
	EYQELMNTK	3	1	1	P13647		1155.54	0.0022	0.121102	High	1.378	0	Medium	1.33031	0	Low	0.822156	0	0
	EYQELMNTK	2	1	1	P13647	M6(Oxidation)	1171.53	0.002518	0.0326711				High	1.67	0	Low	0.796789	0	0
	GRLDSELR	6	5	3	Q5XKE5;P02538;P13647		945.511	0.002564	0.132477	High	2.60572	0	Low	2.74039	0	High	2.3457	0	1
	GELALKDAR	4	3	1	P13647		972.547	0.002923	0.152168	High	1.84415	0	Low	1.58643	0	Medium	1.99803	0	1
	TEEREQIK	2	2	1	P13647		1032.53	0.008465	0.103203				High	2.34275	0	Medium	1.93607	0	1
	GELALK	3	6	3	Q5XKE5;Q8N1N4;P13647		630.382	0.008756	0.117968	Low	0.651752	0	High	1.84857	0	Medium	1.3124	0	0
	RISISTSGGSFR	1	1	1	P13647		1267.68	0.021875	0.332418	Medium	2.03629	0							1
	NKYEDEINK	3	7	4	Q5XKE5;P02538;P13647;P04264	K9(HNE)	1308.66	0.029535	0.382619	Low	2.04931	0				Medium	2.21763	0	1
	LDSELR	3	9	4	Q5XKE5;Q86Y46;P02538;P13647		732.388	0.036895	0.46851	Medium	1.15585	0	Low	1.02993	0	Medium	1.40364	0	0
	QSSVSFR	3	1	1	P13647		810.41	0.041923	0.407804	Medium	1.35746	0	Low	1.77222	0	Low	1.32708	0	0
	HEISEMNRMIQR	1	1	1	P13647	R8(MG-H1); M9(Oxidation)	1613.74	0.739963	1	Low	1.30427	0							1
	QCANLQNAIADAEQRGELALKDARNK	2	1	1	P13647	C2(Carbamidomethyl); K21(HNE)	3053.61	0.800378	1				Low	2.94477	0				3
	MIQRLRAEIDNVK	6	1	1	P13647	M1(Oxidation)	1601.87			Low	2.33411	0	Low	2.51163	0	Low	2.02477	0	2
	QSSVSFRSGGSR	13	1	1	P13647		1254.61			Low	1.82228	0	Low	1.73419	0	Low	2.2182	0	1
	VELEAK	3	4	1	P13647		688.388			Low	0.996364	0	Low	0.981197	0	Low	0.96897	0	0
	YEDEINKR	3	11	5	Q7Z794;P02538;P35908;P13647;P04264	Y1(Nitro)	1111.5			Low	0.894758	0	Low	0.899543	0	Low	0.711236	0	1
	TTAENEFVMLK	2	1	1	P13647		1282.64			Low	0.831008	0	Low	0.970794	0				0
	MIQRLRAEIDNVK	1	1	1	P13647		1585.87						Low	2.38955	0				2
	AQYEEIANRSR	1	1	1	P13647	R9(MG-H1); R11(MG-H1)	1444.68						Low	1.7932	0				1
	DVDAAYMNKVELEAK	1	2	1	P13647	K15(HNE)	1851.93						Low	1.23357	0				1
	VRFLEQQNKVLDTK	1	3	2	P02538;P13647	K9(ONE)	1872.06						Low	1.14034	0				2
	HEISEMNRMIQR	1	1	1	P13647	M6(Oxidation); R8(MG-H1); R12(MG-H1)	1667.76									Low	0.798667	0	1
	NKYEDEINK	1	7	4	Q5XKE5;P02538;P13647;P04264	Y3(Nitro)	1197.55									Low	0.593431	0	1
Q9C075	Keratin, type I cytoskeletal 23 OS=Homo sapiens GN=KRT23 PE=1 SV=2 - [K1C23_HUMAN]	62.32	1	17	30	91	54.6417	56.16	25	30	51.3174	52.13	22	32	47.1216	49.76	19	29	422	48.1012	6.53662
	Sequence	# PSMs	# Proteins	# Protein Groups	Protein Group Accessions	Modifications	MH+ [Da]	q-Value	PEP	A2	XCorr A2	Probability A2	B2	XCorr B2	Probability B2	C2	XCorr C2	Probability C2	# Missed Cleavages
	TLDNLTIVTTDLEQEVEGMR	3	1	1	Q9C075		2277.13	0	0.00337383	High	4.73168	0	High	3.94324	0	High	4.80343	0	0
	TFQALEIDLQTQYSTK	3	1	1	Q9C075		1885.96	0	0.0185925	High	4.36229	0	High	4.85252	0				0
	LQDMQEIISHYEEELTQLR	4	1	1	Q9C075		2375.16	0	5.41402e-11	High	4.34478	0	High	4.40241	0	High	4.80842	0	0
	MTNAQIILLIDNAR	7	1	1	Q9C075	M1(Oxidation)	1601.87	0	9.90282e-05	High	3.9051	0	High	4.20406	0	High	3.39881	0	0
	QNNEYQVLLGIK	3	1	1	Q9C075		1418.76	0	0.026614	High	3.30804	0	High	3.1299	0	High	2.32184	0	0
	KDYSQYEENITHLQEQIVDGK	2	1	1	Q9C075		2537.21	0	1.85465e-07	High	3.14389	0				High	3.93137	0	1
	DYSQYEENITHLQEQIVDGK	1	1	1	Q9C075		2409.12	0	0.00297891	High	2.97493	0							0
	ATMQNLNDR	3	2	2	Q04695;Q9C075		1062.5	0	0.00130602	High	1.37497	0	High	1.48308	0	High	1.94156	0	0
	MTNAQIILLIDNAR	1	1	1	Q9C075		1585.87	0	1.00872e-06				High	4.1724	0				0
	SALENMLSETQSR	2	1	1	Q9C075	M6(Oxidation)	1481.69	0	0.00114851				High	3.56018	0	High	3.69306	0	0
	ISLSFTTR	3	1	1	Q9C075		924.515	0.000475	0.00504968	High	1.90054	0	High	2.18257	0	High	1.86097	0	0
	DLEIEVEGLRR	3	1	1	Q9C075		1328.72	0.000475	0.00961458	Medium	1.84711	0	High	1.80183	0	High	1.83397	0	1
	ATMQNLNDR	2	2	2	Q04695;Q9C075	M3(Oxidation)	1078.49	0.000475	0.010498				High	1.90216	0	High	1.88928	0	0
	DLEIEVEGLR	3	1	1	Q9C075		1172.62	0.000581	0.00180044	Low	1.04613	0	High	2.77769	0				0
	HHVPSDFNVNVK	3	1	1	Q9C075		1392.7	0.000908	0.00288876	High	3.40591	0	High	2.90096	0	High	2.29084	0	0
	ALEEANMK	3	1	1	Q9C075	M7(Oxidation)	921.435	0.000908	0.00251169	High	2.10985	0	High	1.93282	0	High	1.90143	0	0
	YENEHSFKK	4	1	1	Q9C075		1181.56	0.002534	0.0455133	High	2.58556	0	Low	1.21904	0	High	1.29822	0	1
	TLDNLTIVTTDLEQEVEGMRK	1	1	1	Q9C075		2405.22	0.004116	0.0455255				High	1.90074	0				1
	SALENMLSETQSR	1	1	1	Q9C075		1465.7	0.011288	0.131486							Medium	1.40909	0	0
	LASYLEK	4	8	5	Q15323;Q14525;O76011;Q9C075;O76009		823.455	0.013241	0.15557	Medium	2.14324	0	Medium	2.13078	0	Medium	1.92823	0	0
	APTVHGGAGGAR	4	1	1	Q9C075		1050.54	0.014079	0.199194	Medium	1.53288	0	Medium	1.36778	0	Low	1.89813	0	0
	VDTGPREDLIK	6	1	1	Q9C075		1242.67	0.037569	0.437233	Low	1.85533	0	Medium	2.0582	0	Low	1.80257	0	1
	EESKSSMK	8	1	1	Q9C075	K4(Glycation); M7(Oxidation)	1103.47	0.74557	1	Low	0.667663	0	Low	1.10462	0	Low	0.656845	0	1
	KELILMKK	1	1	1	Q9C075		1002.65	0.784057	1	Low	0.734745	0							2
	ELILMKKHHEQEMEK	1	1	1	Q9C075	K6(HNE); K15(Glycation)	2241.15			Low	2.12062	0							2
	SFPRAPTVHGGAGGAR	1	1	1	Q9C075		1537.8			Low	1.36052	0							1
	VSATPKIK	2	1	1	Q9C075	K6(Glycation); K8(ONE)	1159.69			Low	1.28287	0	Low	1.21396	0				1
	KELILMKKHHEQEMEK	1	1	1	Q9C075	M6(Oxidation); M14(Oxidation); K16(Glycation)	2245.1			Low	1.13917	0							3
	VRALEEANMKLESR	1	1	1	Q9C075	K10(Glycation)	1807.93			Low	1.00604	0							2
	VLEDMR	1	1	1	Q9C075		762.381			Low	0.738377	0							0
	VSATPK	3	1	1	Q9C075		602.351						Low	1.43381	0	Low	1.2785	0	0
	KHHEQEMEK	2	1	1	Q9C075	K9(Glycation)	1357.62						Low	1.03063	0	Low	1.35167	0	1
	SCPPPGGSWGSGR	1	1	1	Q9C075	C2(Carbamidomethyl)	1301.57						Low	0.927362	0				0
	TLDNLTIVTTDLEQEVEGMRK	1	1	1	Q9C075	M19(Oxidation)	2421.22									Low	1.27199	0	1
	EESKSSMK	1	1	1	Q9C075	K8(Glycation)	1087.49									Low	0.488828	0	1
	ATMQNLNDR	1	2	2	Q04695;Q9C075	M3(Oxidation); R9(MG-H1)	1132.5									Low	0.456468	0	0
Q9H1E1	Ribonuclease 7 OS=Homo sapiens GN=RNASE7 PE=1 SV=2 - [RNAS7_HUMAN]	62.18	1	6	8	31	21.6425	50	5	9	19.0023	46.15	6	11	10.2496	62.18	8	11	156	17.4079	9.68604
	Sequence	# PSMs	# Proteins	# Protein Groups	Protein Group Accessions	Modifications	MH+ [Da]	q-Value	PEP	A2	XCorr A2	Probability A2	B2	XCorr B2	Probability B2	C2	XCorr C2	Probability C2	# Missed Cleavages
	DLNTFLHEPFSSVAATCQTPK	6	1	1	Q9H1E1	C17(Carbamidomethyl)	2363.13	0	0.0149568	High	3.97001	0	High	3.10113	0	High	3.49433	0	0
	DSQQFHLVPVHLDR	8	1	1	Q9H1E1		1690.87	0	0.00981813	High	3.87046	0	High	3.16523	0	Low	2.21126	0	0
	SYVVACKPPQK	6	1	1	Q9H1E1	C6(Carbamidomethyl)	1276.67	0	0.00211887	High	2.56769	0	High	2.60922	0	High	2.42163	0	0
	IQHMQPSPQACNSAMK	2	1	1	Q9H1E1	C11(Carbamidomethyl)	1827.83	0	0.00219421				High	2.08328	0	High	1.79604	0	0
	IQHMQPSPQACNSAMK	1	1	1	Q9H1E1	M4(Oxidation); C11(Carbamidomethyl); M15(Oxidation)	1859.82	0	0.000102137				High	1.76593	0				0
	GMTSSQWFK	3	1	1	Q9H1E1		1071.49	0.002518	0.0369694	High	1.74171	0	High	1.45632	0	Medium	1.54983	0	0
	CKDLNTFLHEPFSSVAATCQTPK	1	1	1	Q9H1E1	C1(Carbamidomethyl); C19(Carbamidomethyl)	2651.26	0.002534	0.0439131							High	2.39198	0	1
	IACKNGDKNCHQSHGAVSLTMCK	2	1	1	Q9H1E1	C3(Carbamidomethyl); K4(ONE); C10(Carbamidomethyl); C22(Carbamidomethyl)	2770.27			Low	1.19533	0				Low	2.12239	0	2
	SYVVACKPPQKK	2	1	1	Q9H1E1	C6(Carbamidomethyl)	1404.77						Low	1.43858	0	Low	1.07546	0	1
O76009	Keratin, type I cuticular Ha3-I OS=Homo sapiens GN=KRT33A PE=2 SV=2 - [KT33A_HUMAN]	61.39	1	3	24	83	73.0023	51.73	21	28	76.8924	53.47	20	30	68.8652	55.94	21	25	404	45.9114	4.81787
	Sequence	# PSMs	# Proteins	# Protein Groups	Protein Group Accessions	Modifications	MH+ [Da]	q-Value	PEP	A2	XCorr A2	Probability A2	B2	XCorr B2	Probability B2	C2	XCorr C2	Probability C2	# Missed Cleavages
	QVVSSSEQLQSYQAEIIELR	6	3	3	Q15323;Q14525;O76009		2307.18	0	7.53337e-08	High	5.54505	0	High	5.46731	0	High	5.94505	0	0
	TVNALEIELQAQHNLR	7	4	4	Q15323;Q14525;O76011;O76009		1848.99	0	0.00294238	High	5.27328	0	High	5.27836	0	High	5.1644	0	0
	SDLEAQVESLKEELLCLK	7	3	3	Q92764;Q15323;O76009	C16(Carbamidomethyl)	2104.09	0	2.19776e-06	High	4.78628	0	High	5.55747	0	High	5.47496	0	1
	LITNVESQLAEIR	3	1	1	O76009		1485.83	0	0.0045449	High	4.67411	0	High	3.69288	0	High	4.08345	0	0
	EVEQWFATQTEELNK	3	3	3	Q14525;O76011;O76009		1851.88	0	1.04229e-06	High	4.471	0	High	4.42972	0	High	3.89316	0	0
	QNQEYQVLLDVR	6	6	6	Q92764;Q15323;Q14532;Q14525;O76011;O76009		1504.78	0	0.0143376	High	3.54944	0	High	3.39061	0	High	3.3801	0	0
	ARLECEINTYR	3	5	5	Q92764;Q15323;Q14525;O76011;O76009	C5(Carbamidomethyl)	1424.69	0	0.00123212	High	3.20094	0	High	3.25462	0	High	3.64587	0	1
	YSSQLSQVQR	3	1	1	O76009		1195.61	0	0.0214974	High	2.90013	0	High	2.87315	0	High	3.0205	0	0
	ILDELTLCR	3	2	2	Q14525;O76009	C8(Carbamidomethyl)	1132.6	0	0.00757035	High	2.85523	0	High	2.77371	0	High	2.21469	0	0
	DNAELENLIR	2	3	3	Q15323;Q14525;O76009		1186.61	0	5.0606e-05	High	2.77852	0				High	1.86899	0	0
	LVVQIDNAK	3	3	3	Q15323;Q14525;O76009		999.583	0	0.00134026	High	2.64438	0	High	2.17802	0	High	2.37702	0	0
	DSLENTLTESEAR	4	3	3	Q15323;Q14532;O76009		1464.68	0	0.000224898	High	2.62666	0	High	2.99987	0	High	3.06817	0	0
	ETMQFLNDR	3	8	6	O76015;Q15323;Q14532;Q14525;O76011;O76009		1153.53	0	0.000212221	High	2.51044	0	High	2.38703	0	High	2.50286	0	0
	LNVEVDAAPTVDLNQVLNETR	1	1	1	O76009		2310.19	0	1.46512e-12							High	5.63306	0	0
	SQYEALVETNR	3	2	2	Q15323;O76009		1309.64	0.000567	0.0515989	High	2.04674	0	High	1.35805	0	High	1.86656	0	0
	LECEINTYR	5	5	5	Q92764;Q15323;Q14525;O76011;O76009	C3(Carbamidomethyl)	1197.56	0.000581	0.00184766	Medium	2.0337	0	High	2.9001	0	High	2.02889	0	0
	TIEELQQK	2	6	5	Q15323;Q14532;Q14525;O76011;O76009		988.531	0.000581	0.00187047				High	2.77279	0	Low	0.924083	0	0
	SQYEALVETNRR	6	2	2	Q15323;O76009		1465.74	0.000908	0.00234518	High	2.41052	0	High	2.25542	0	High	2.23179	0	1
	LASDDFR	3	2	2	O76011;O76009		823.395	0.004528	0.0724986	Medium	1.81964	0	High	1.84696	0	High	2.26765	0	0
	LASYLEK	4	8	5	Q15323;Q14525;O76011;Q9C075;O76009		823.455	0.013241	0.15557	Medium	2.14324	0	Medium	2.13078	0	Medium	1.92823	0	0
	CQLGDR	3	6	5	Q92764;Q15323;Q14532;Q14525;O76009	C1(Carbamidomethyl)	748.341	0.016312	0.215647	Medium	1.49074	0	Medium	1.30622	0	Medium	1.54173	0	0
	QLVESDINGLRR	1	3	3	Q92764;Q15323;O76009		1399.77	0.140031	0.620624	Low	2.04393	0							1
	LASDDFRTKYETELSLRQLVESDINGLR	1	1	1	O76009	K9(HNE); R28(MG-H1)	3478.82	0.630003	1				Low	2.08108	0				3
	QLVESDINGLR	1	3	3	Q92764;Q15323;O76009		1243.66			Low	0.787617	0							0
P01040	Cystatin-A OS=Homo sapiens GN=CSTA PE=1 SV=1 - [CYTA_HUMAN]	61.22	1	3	5	7	4.07057	21.43	2	2	7.42575	38.78	3	3	1.70907	27.55	2	2	98	10.9997	5.50342
	Sequence	# PSMs	# Proteins	# Protein Groups	Protein Group Accessions	Modifications	MH+ [Da]	q-Value	PEP	A2	XCorr A2	Probability A2	B2	XCorr B2	Probability B2	C2	XCorr C2	Probability C2	# Missed Cleavages
	SLPGQNEDLVLTGYQVDK	1	1	1	P01040		1976	0	0.00127425				High	3.94987	0				0
	VKPQLEEK	1	1	1	P01040		970.558	0.009306	0.220735	High	2.39661	0							0
	LEAVQYK	1	1	1	P01040		850.467	0.016896	0.219997				Medium	1.80194	0				0
	AGDNKYMHLKVFK	3	1	1	P01040	K5(Glycation); K10(Glycation)	1874.93			Low	1.67396	0	Low	1.67394	0	Low	1.70907	0	2
	TQVVAGTNYYIKVRAGDNKYMHLK	1	1	1	P01040	Y9(Nitro); Y10(Nitro); R14(MG-H1); M21(Oxidation)	2929.41									Low	1.00276	0	3
Q14525	Keratin, type I cuticular Ha3-II OS=Homo sapiens GN=KRT33B PE=1 SV=3 - [KT33B_HUMAN]	59.65	2	3	20	80	76.573	57.67	19	27	82.5618	54.7	18	29	63.3532	54.46	19	24	404	46.1845	4.84326
	Sequence	# PSMs	# Proteins	# Protein Groups	Protein Group Accessions	Modifications	MH+ [Da]	q-Value	PEP	A2	XCorr A2	Probability A2	B2	XCorr B2	Probability B2	C2	XCorr C2	Probability C2	# Missed Cleavages
	QVVSSSEQLQSYQAEIIELR	6	3	3	Q15323;Q14525;O76009		2307.18	0	7.53337e-08	High	5.54505	0	High	5.46731	0	High	5.94505	0	0
	YSSQLSQVQSLITNVESQLAEIR	3	2	2	Q15323;Q14525		2593.35	0	0.00384726	High	5.31797	0	High	4.70952	0	High	5.17647	0	0
	TVNALEIELQAQHNLR	7	4	4	Q15323;Q14525;O76011;O76009		1848.99	0	0.00294238	High	5.27328	0	High	5.27836	0	High	5.1644	0	0
	SDLEAQMESLKEELLSLK	4	1	1	Q14525		2063.06	0	0.00255841	High	5.09921	0	High	4.36104	0	High	2.32795	0	1
	LNVEVDAAPAVDLNQVLNETR	2	1	1	Q14525		2280.18	0	1.35781e-06	High	4.97355	0	High	5.35311	0				0
	EVEQWFATQTEELNK	3	3	3	Q14525;O76011;O76009		1851.88	0	1.04229e-06	High	4.471	0	High	4.42972	0	High	3.89316	0	0
	QNQEYQVLLDVR	6	6	6	Q92764;Q15323;Q14532;Q14525;O76011;O76009		1504.78	0	0.0143376	High	3.54944	0	High	3.39061	0	High	3.3801	0	0
	SQQQEPLLCPSYQSYFK	3	3	3	Q15323;Q14525;O76011	C9(Carbamidomethyl)	2102.98	0	5.0854e-07	High	3.306	0	High	4.52988	0	High	4.03487	0	0
	ARLECEINTYR	3	5	5	Q92764;Q15323;Q14525;O76011;O76009	C5(Carbamidomethyl)	1424.69	0	0.00123212	High	3.20094	0	High	3.25462	0	High	3.64587	0	1
	YSLENTLTESEAR	3	1	1	Q14525		1512.72	0	2.00434e-06	High	2.96262	0	High	3.62791	0	High	2.72808	0	0
	ILDELTLCR	3	2	2	Q14525;O76009	C8(Carbamidomethyl)	1132.6	0	0.00757035	High	2.85523	0	High	2.77371	0	High	2.21469	0	0
	DNAELENLIR	2	3	3	Q15323;Q14525;O76009		1186.61	0	5.0606e-05	High	2.77852	0				High	1.86899	0	0
	LVVQIDNAK	3	3	3	Q15323;Q14525;O76009		999.583	0	0.00134026	High	2.64438	0	High	2.17802	0	High	2.37702	0	0
	ETMQFLNDR	3	8	6	O76015;Q15323;Q14532;Q14525;O76011;O76009		1153.53	0	0.000212221	High	2.51044	0	High	2.38703	0	High	2.50286	0	0
	LAADDFR	12	17	8	O76015;Q92764;P02533;Q04695;P13645;Q15323;Q14532;Q14525		807.4	0	0.00133535	High	2.28148	0	High	2.48472	0	High	2.36499	0	0
	LECEINTYR	5	5	5	Q92764;Q15323;Q14525;O76011;O76009	C3(Carbamidomethyl)	1197.56	0.000581	0.00184766	Medium	2.0337	0	High	2.9001	0	High	2.02889	0	0
	TIEELQQK	2	6	5	Q15323;Q14532;Q14525;O76011;O76009		988.531	0.000581	0.00187047				High	2.77279	0	Low	0.924083	0	0
	LASYLEK	4	8	5	Q15323;Q14525;O76011;Q9C075;O76009		823.455	0.013241	0.15557	Medium	2.14324	0	Medium	2.13078	0	Medium	1.92823	0	0
	CQLGDR	3	6	5	Q92764;Q15323;Q14532;Q14525;O76009	C1(Carbamidomethyl)	748.341	0.016312	0.215647	Medium	1.49074	0	Medium	1.30622	0	Medium	1.54173	0	0
	LAADDFRTKYQTEQSLR	3	1	1	Q14525	R7(MG-H1); K9(ONE)	2250.15			Low	1.90851	0				Low	1.68763	0	2
Q96P63	Serpin B12 OS=Homo sapiens GN=SERPINB12 PE=1 SV=1 - [SPB12_HUMAN]	59.01	1	17	19	86	105.743	56.54	18	32	84.9418	57.78	18	30	78.6505	52.84	16	24	405	46.2471	5.52881
	Sequence	# PSMs	# Proteins	# Protein Groups	Protein Group Accessions	Modifications	MH+ [Da]	q-Value	PEP	A2	XCorr A2	Probability A2	B2	XCorr B2	Probability B2	C2	XCorr C2	Probability C2	# Missed Cleavages
	DAINAETVLVLVNAVYFK	7	1	1	Q96P63		1979.08	0	0.00146598	High	5.59366	0	High	5.27507	0	High	4.73732	0	0
	SRQEINFWVECQSQGK	5	1	1	Q96P63	C11(Carbamidomethyl)	1995.94	0	0.00763146	High	5.35902	0	High	5.17581	0	High	4.54062	0	1
	FTLEDSYDLNSILQDMGITDIFDETR	3	1	1	Q96P63	M16(Oxidation)	3067.41	0	4.62572e-06	High	5.34002	0	High	5.37426	0	High	5.26211	0	0
	LYGEQEFPICQEYLDGVIQFYHTTIESVDFQKNPEK	3	1	1	Q96P63	C10(Carbamidomethyl)	4365.07	0	2.27094e-06	High	5.04197	0	High	4.74686	0	High	4.80957	0	1
	LYGEQEFPICQEYLDGVIQFYHTTIESVDFQK	5	1	1	Q96P63	C10(Carbamidomethyl)	3896.84	0	1.98166e-08	High	5.02999	0	High	5.67606	0	High	5.90839	0	0
	NIFFSPLSLSAALGMVR	5	1	1	Q96P63	M15(Oxidation)	1838.98	0	1.60126e-06	High	4.84197	0	High	5.19873	0	High	4.76075	0	0
	NIFFSPLSLSAALGMVR	4	1	1	Q96P63		1822.99	0	1.23083e-09	High	4.61135	0	High	3.57348	0	High	3.3624	0	0
	FCFDLFQEIGKDDR	7	1	1	Q96P63	C2(Carbamidomethyl)	1789.82	0	8.69306e-10	High	3.8124	0	High	3.93892	0	High	3.65804	0	1
	LSMFVLLPSHSK	4	1	1	Q96P63		1358.75	0	0.0442229	High	3.69453	0	High	2.57834	0	High	2.40073	0	0
	FTLEDSYDLNSILQDMGITDIFDETR	2	1	1	Q96P63		3051.42	0	0.00107417	High	3.56104	0	High	2.80128	0				0
	ADLTGISPSPNLYLSK	5	1	1	Q96P63		1675.89	0	0.00021827	High	2.989	0	High	3.43061	0	High	3.24981	0	0
	MVAWSSSENMSEESVVLSFPR	3	1	1	Q96P63		2372.09	0	0.00189031	High	2.8243	0	High	3.11638	0	High	3.15605	0	0
	QEINFWVECQSQGK	3	1	1	Q96P63	C9(Carbamidomethyl)	1752.8	0	1.61362e-05	High	2.66258	0	High	3.64466	0	High	3.58282	0	0
	IGFIEEVK	3	1	1	Q96P63		934.524	0	0.000452546	High	2.40018	0	High	2.87727	0	High	2.71585	0	0
	TQTILFYGR	3	1	1	Q96P63		1098.59	0.000475	0.0039449	High	2.647	0	High	2.41077	0	High	2.48545	0	0
	LSMFVLLPSHSK	3	1	1	Q96P63	M3(Oxidation)	1374.74	0.000581	0.00187047	Medium	2.68706	0	High	2.81338	0	High	2.43562	0	0
	MVAWSSSENMSEESVVLSFPR	4	1	1	Q96P63	M1(Oxidation); M10(Oxidation)	2404.08	0.0022	0.123542	High	2.76917	0	Medium	2.1078	0	Low	1.92876	0	0
	AQILEMR	3	1	1	Q96P63	M6(Oxidation)	876.46	0.003923	0.186231	High	1.84536	0	Medium	1.7385	0	Medium	1.36124	0	0
	GLEELER	3	1	1	Q96P63		845.436	0.004528	0.0701365	High	1.76621	0	High	1.70837	0	High	1.86258	0	0
	IKELFSK	3	1	1	Q96P63		864.519	0.007732	0.0979142	Medium	1.82368	0	High	2.19268	0	Medium	1.64742	0	1
	TDYTLSIANR	2	1	1	Q96P63		1153.59	0.01063	0.237065	Medium	0.884482	0	Low	1.58786	0				0
	AQILEMRYTKGK	1	1	1	Q96P63	Y8(Nitro); K12(ONE)	1636.86			Low	1.08261	0							2
	AQILEMR	2	1	1	Q96P63	R7(MG-H1)	914.473			Low	0.618652	0	Low	1.03175	0				0
	MVAWSSSENMSEESVVLSFPR	2	1	1	Q96P63	M1(Oxidation)	2388.09						Low	1.18572	0				0
	EPDPCLKSNK	1	1	1	Q96P63	C5(Carbamidomethyl); K10(ONE)	1341.67						Low	1.05395	0				1
Q7Z794	Keratin, type II cytoskeletal 1b OS=Homo sapiens GN=KRT77 PE=2 SV=3 - [K2C1B_HUMAN]	57.09	1	25	37	149	104.427	56.23	32	50	117.824	48.27	28	48	97.3864	49.65	30	51	578	61.8635	5.98584
	Sequence	# PSMs	# Proteins	# Protein Groups	Protein Group Accessions	Modifications	MH+ [Da]	q-Value	PEP	A2	XCorr A2	Probability A2	B2	XCorr B2	Probability B2	C2	XCorr C2	Probability C2	# Missed Cleavages
	WELLQQVNTSTGTNNLEPLLENYIGDLR	4	1	1	Q7Z794		3230.63	0	2.96497e-12	High	5.9759	0	High	6.06376	0	High	5.75327	0	0
	YLFLTELSQVQTHISDTNVILSMDNNR	4	1	1	Q7Z794		3151.57	0	7.40008e-08	High	5.35136	0	High	4.89118	0	High	4.84541	0	0
	WELLQQVNTSTGTNNLEPLLENYIGDLRR	3	1	1	Q7Z794		3386.74	0	1.67358e-06	High	4.98898	0	High	4.86126	0				1
	LQDLEEALQQSK	3	1	1	Q7Z794		1401.72	0	5.58056e-05	High	4.65875	0	High	4.13409	0	High	3.92923	0	0
	FLEQQNQVLQTK	14	3	3	Q7Z794;P35908;P04264		1475.79	0	0.0105678	High	4.59598	0	High	4.82209	0	High	4.75761	0	0
	SKDEAEALYQTK	4	1	1	Q7Z794		1382.68	0	7.21413e-06	High	4.52366	0	High	4.56622	0	High	4.60635	0	1
	QIEQMQSLISDAEERGEQALQDAWQK	1	1	1	Q7Z794		3031.44	0	0.00603856	High	4.49768	0							1
	STSGFCQGGGVGGFGGGR	4	1	1	Q7Z794	C6(Carbamidomethyl)	1644.72	0	4.72023e-08	High	4.13278	0	High	4.38074	0	High	4.73419	0	0
	VDTLTGEVNFLK	3	1	1	Q7Z794		1335.72	0	0.0157952	High	3.98118	0	High	3.23667	0	High	2.03355	0	0
	SLDLDSIIDAVR	4	1	1	Q7Z794		1316.71	0	2.04803e-08	High	3.91661	0	High	3.68441	0	High	4.04784	0	0
	TGSENDFVVLKK	6	1	1	Q7Z794		1336.71	0	6.09411e-05	High	3.71407	0	High	3.54012	0	High	3.45235	0	1
	YQELQITAGR	3	1	1	Q7Z794		1178.62	0	0.0380941	High	3.15098	0	High	2.28594	0	High	2.83774	0	0
	LQAEISNVKK	6	1	1	Q7Z794		1129.66	0	0.0447845	High	2.94553	0	High	2.96635	0	High	2.60234	0	1
	SKYEDEINKR	8	1	1	Q7Z794		1281.64	0	0.0267634	High	2.89114	0	High	3.48636	0	High	3.06998	0	2
	QVDLLSAEQMR	3	1	1	Q7Z794		1289.65	0	0.00134026	Low	1.74903	0	High	1.74557	0	High	1.6941	0	0
	GEQALQDAWQK	3	1	1	Q7Z794		1273.62	0	2.61216e-05	Medium	1.25642	0	Low	1.40265	0	High	3.26837	0	0
	LQDLEEALQQSKEELAR	2	1	1	Q7Z794		2000.03	0	0.00134026				High	3.89754	0				1
	QIEQMQSLISDAEER	1	1	1	Q7Z794		1776.84	0	1.58294e-05				High	3.76689	0				0
	EQIMVLNNK	3	1	1	Q7Z794		1088.58	0.000475	0.0092253	High	2.29155	0	High	2.11754	0	High	1.80215	0	0
	SMQDVVEDYK	3	1	1	Q7Z794	M2(Oxidation)	1229.54	0.000581	0.00134026	Medium	1.62405	0	High	2.7085	0	Medium	1.71252	0	0
	TGSENDFVVLK	3	1	1	Q7Z794		1208.62	0.000908	0.00188745	High	2.24153	0	High	2.28768	0	High	2.24368	0	0
	YEDEINK	3	12	6	Q5XKE5;Q7Z794;P02538;P35908;P13647;P04264		910.415	0.000908	0.00194671	High	2.10795	0	High	1.73702	0	High	2.20207	0	0
	FASFIDK	11	18	6	Q5XKE5;Q86Y46;Q7Z794;P02538;P35908;P13647		827.43	0.000908	0.00554679	High	2.00992	0	High	2.01274	0	High	1.94041	0	0
	DYQAMLGVK	3	1	1	Q7Z794	M5(Oxidation)	1040.51	0.000908	0.00187047	High	1.65748	0	High	1.51727	0	High	1.76462	0	0
	YEDEINKR	13	11	5	Q7Z794;P02538;P35908;P13647;P04264		1066.52	0.000923	0.0133839	High	2.33296	0	High	2.2038	0	High	2.16838	0	1
	TQYELIAQR	3	1	1	Q7Z794		1121.6	0.000923	0.011723	High	1.21121	0	High	1.86478	0	High	1.33356	0	0
	FASFIDKVR	5	17	6	Q5XKE5;Q86Y46;Q7Z794;P02538;P35908;P13647		1082.6	0.001394	0.105287	High	2.09797	0	High	1.51442	0	High	1.83712	0	1
	CGGGGYGIHGR	1	1	1	Q7Z794	C1(Carbamidomethyl)	1090.49	0.002127	0.0382364							High	1.99055	0	0
	VDLESR	3	1	1	Q7Z794		718.373	0.020671	0.319963	Medium	1.50915	0	Medium	2.24906	0	Medium	1.94577	0	0
	QLLEGEESR	2	1	1	Q7Z794		1060.53	0.020671	0.317185	Medium	1.49457	0				Low	0.933768	0	0
	QVDLLSAEQMR	2	1	1	Q7Z794	M10(Oxidation)	1305.65	0.071077	0.661631	Low	0.855159	0				Low	1.09501	0	0
	EQIMVLNNK	1	1	1	Q7Z794	M4(Oxidation)	1104.57	0.091094	0.869024				Low	1.28058	0				0
	SISINLMGR	4	1	1	Q7Z794	M7(Oxidation)	1006.53	0.182821	0.679856	Low	1.41748	0	Low	1.33438	0	Low	1.16152	0	0
	SMQDVVEDYKSKYEDEINK	2	1	1	Q7Z794	M2(Oxidation); K10(Glycation); K19(Glycation)	2660.15	0.764489	1							Low	1.55382	0	2
	NSKMEIAELNR	1	1	1	Q7Z794	R11(MG-H1)	1358.68			Low	1.72139	0							1
	DVDAAYVSKVDLESR	2	1	1	Q7Z794	Y6(Nitro)	1711.82			Low	1.0252	0				Low	1.21859	0	1
	GRCGGGGYGIHGR	1	1	1	Q7Z794	R2(MG-H1); C3(Carbamidomethyl); R13(MG-H1)	1411.64			Low	1.01183	0							1
	YEDEINKR	3	11	5	Q7Z794;P02538;P35908;P13647;P04264	Y1(Nitro)	1111.5			Low	0.894758	0	Low	0.899543	0	Low	0.711236	0	1
	SLYNLGGSR	1	1	1	Q7Z794	Y3(Nitro)	1011.48			Low	0.852805	0							0
	GRCGGGGYGIHGR	1	1	1	Q7Z794	C3(Carbamidomethyl); H11(HNE); R13(MG-H1)	1513.73			Low	0.676711	0							1
	TQYELIAQR	1	1	1	Q7Z794	Y3(Nitro)	1166.57									Low	1.67406	0	0
	SKYEDEINK	1	1	1	Q7Z794	K2(HNE); Y3(Nitro)	1326.64									Low	1.32117	0	1
Q04695	Keratin, type I cytoskeletal 17 OS=Homo sapiens GN=KRT17 PE=1 SV=2 - [K1C17_HUMAN]	56.71	5	4	30	109	49.9758	45.37	24	35	46.2424	45.37	25	39	50.2165	46.53	23	35	432	48.076	5.021
	Sequence	# PSMs	# Proteins	# Protein Groups	Protein Group Accessions	Modifications	MH+ [Da]	q-Value	PEP	A2	XCorr A2	Probability A2	B2	XCorr B2	Probability B2	C2	XCorr C2	Probability C2	# Missed Cleavages
	EVATNSELVQSGK	3	2	2	P02533;Q04695		1361.69	0	1.02249e-08	High	3.78933	0	High	4.14694	0	High	4.20307	0	0
	CEMEQQNQEYK	1	2	2	P02533;Q04695	C1(Carbamidomethyl); M3(Oxidation)	1502.59	0	0.0169123	High	3.70746	0							0
	CEMEQQNQEYK	3	2	2	P02533;Q04695	C1(Carbamidomethyl)	1486.6	0	0.0122933	High	3.44293	0	High	3.46805	0	High	3.90496	0	0
	VLDELTLAR	3	5	2	P02533;Q04695		1029.59	0	0.0381391	High	3.32021	0	High	3.26738	0	High	3.10857	0	0
	LEQEIATYR	3	8	2	P02533;Q04695		1122.58	0	0.0244648	High	2.87338	0	High	1.41649	0	High	1.96077	0	0
	ASLEGNLAETENR	3	1	1	Q04695		1403.68	0	0.000101615	High	2.62111	0	High	2.77442	0	High	2.36319	0	0
	LASYLDKVR	9	7	3	P02533;Q04695;P13645		1064.61	0	7.01552e-05	High	2.45328	0	High	2.73174	0	High	2.92151	0	1
	LAADDFR	12	17	8	O76015;Q92764;P02533;Q04695;P13645;Q15323;Q14532;Q14525		807.4	0	0.00133535	High	2.28148	0	High	2.48472	0	High	2.36499	0	0
	RVLDELTLAR	1	5	2	P02533;Q04695		1185.7	0	0.0236298	High	2.26566	0							1
	NHEEEMNALR	3	2	2	P02533;Q04695		1242.55	0	0.0382611	High	2.13212	0	High	2.26863	0	High	2.0024	0	0
	ATMQNLNDR	3	2	2	Q04695;Q9C075		1062.5	0	0.00130602	High	1.37497	0	High	1.48308	0	High	1.94156	0	0
	ILTATVDNANILLQIDNAR	1	1	1	Q04695		2068.14	0	0.000186905				High	2.6339	0				0
	ATMQNLNDR	2	2	2	Q04695;Q9C075	M3(Oxidation)	1078.49	0.000475	0.010498				High	1.90216	0	High	1.88928	0	0
	NHEEEMNALR	3	2	2	P02533;Q04695	M6(Oxidation)	1258.55	0.000908	0.00695033	Medium	2.62624	0	High	2.03015	0	High	1.90319	0	0
	IRDWYQR	6	3	2	P02533;Q04695		1036.53	0.002127	0.0224363	Medium	2.12582	0	High	2.0417	0	Medium	2.17094	0	1
	ILLDVK	3	2	2	P02533;Q04695		700.461	0.002127	0.0387048	Medium	1.70027	0	Medium	1.70363	0	High	1.94944	0	0
	TIEELQNK	2	1	1	Q04695		974.516	0.002127	0.0203116				High	1.7307	0	High	1.71483	0	0
	LASYLDK	7	8	4	P02533;Q04695;P13645;P35527		809.44	0.00524	0.062535	High	2.20594	0	Low	2.08368	0	Medium	1.96598	0	0
	ILNEMR	3	3	2	P02533;Q04695		775.413	0.006061	0.0937786	Medium	1.50481	0	High	1.59668	0	High	1.59692	0	0
	ILNEMR	2	3	2	P02533;Q04695	M5(Oxidation)	791.408	0.007732	0.0972598	Medium	1.09075	0	High	1.44619	0				0
	TEELNR	5	4	2	P02533;Q04695		761.379	0.012708	0.171824	Medium	1.71341	0	Medium	1.31914	0	Medium	1.09097	0	0
	YCVQLSQIQGLIGSVEEQLAQLR	1	1	1	Q04695	C2(Carbamidomethyl)	2632.38	0.021875	0.336029	Medium	2.83275	0							0
	SEISELR	3	2	2	P02533;Q04695		833.437	0.02213	0.302785	Low	1.40771	0	Medium	1.2047	0	Low	1.66585	0	0
	ALEEANTELEVK	3	1	1	Q04695		1345.68	0.094573	0.705606	Low	1.38324	0	Low	1.54888	0	Low	1.32638	0	0
	SEISELRR	4	2	2	P02533;Q04695		989.538	0.098865	0.557359	Low	0.875661	0	Low	1.15308	0	Low	2.00221	0	1
	DQYEKMAEKNRK	1	2	2	P02533;Q04695	Y3(Nitro); K5(ONE)	1738.84			Low	1.51474	0							3
	TMQALEIELQSQLSMK	5	1	1	Q04695	M2(Oxidation); M15(Oxidation); K16(Glycation)	2043.99			Low	1.47596	0	Low	1.3861	0	Low	1.63245	0	0
	ILNEMRDQYEKMAEK	2	2	2	P02533;Q04695	Y9(Nitro); K11(Glycation)	2104.95			Low	1.38693	0	Low	1.42427	0				2
	KNHEEEMNALR	2	2	2	P02533;Q04695	R11(MG-H1)	1424.65			Low	1.18573	0	Low	1.1349	0				1
	FETEQALR	3	2	2	P02533;Q04695		993.499			Low	1.05657	0	Low	1.24653	0	Low	1.00762	0	0
	DQYEKMAEK	1	2	2	P02533;Q04695	M6(Oxidation)	1157.51						Low	0.935204	0				1
	LEQEIATYR	1	8	2	P02533;Q04695	Y8(Nitro)	1167.57						Low	0.695069	0				0
	DWYQR	1	3	2	P02533;Q04695		767.347						Low	0.497713	0				0
	MAEKNRKDAEDWFFSK	1	1	1	Q04695	K7(Glycation)	2163.99									Low	1.69256	0	3
	LLEGEDAHLTQYK	1	1	1	Q04695	H8(ONE)	1670.87									Low	1.42535	0	0
	DQYEKMAEK	1	2	2	P02533;Q04695		1141.52									Low	0.835664	0	1
	ATMQNLNDR	1	2	2	Q04695;Q9C075	M3(Oxidation); R9(MG-H1)	1132.5									Low	0.456468	0	0
O76011	Keratin, type I cuticular Ha4 OS=Homo sapiens GN=KRT34 PE=2 SV=2 - [KRT34_HUMAN]	56.42	1	7	24	74	66.0719	48.39	18	25	63.0121	44.5	19	26	58.0174	49.54	19	23	436	49.3922	5.05908
	Sequence	# PSMs	# Proteins	# Protein Groups	Protein Group Accessions	Modifications	MH+ [Da]	q-Value	PEP	A2	XCorr A2	Probability A2	B2	XCorr B2	Probability B2	C2	XCorr C2	Probability C2	# Missed Cleavages
	TVNALEIELQAQHNLR	7	4	4	Q15323;Q14525;O76011;O76009		1848.99	0	0.00294238	High	5.27328	0	High	5.27836	0	High	5.1644	0	0
	LNVEVDTAPTVDLNQVLNETR	6	1	1	O76011		2340.2	0	4.54125e-06	High	4.96915	0	High	4.8212	0	High	5.47419	0	0
	EVEQWFATQTEELNK	3	3	3	Q14525;O76011;O76009		1851.88	0	1.04229e-06	High	4.471	0	High	4.42972	0	High	3.89316	0	0
	DSLENTLTESEAHYSSQLSQVQSLITNVESQLAEIR	3	1	1	O76011		4019.97	0	0.0178369	High	4.09515	0				High	3.32755	0	0
	SDLESQVESLREELICLK	3	1	1	O76011	C16(Carbamidomethyl)	2148.08	0	0.0392207	High	3.98794	0	High	2.11798	0				1
	QNQEYQVLLDVR	6	6	6	Q92764;Q15323;Q14532;Q14525;O76011;O76009		1504.78	0	0.0143376	High	3.54944	0	High	3.39061	0	High	3.3801	0	0
	SQQQEPLLCPSYQSYFK	3	3	3	Q15323;Q14525;O76011	C9(Carbamidomethyl)	2102.98	0	5.0854e-07	High	3.306	0	High	4.52988	0	High	4.03487	0	0
	ARLECEINTYR	3	5	5	Q92764;Q15323;Q14525;O76011;O76009	C5(Carbamidomethyl)	1424.69	0	0.00123212	High	3.20094	0	High	3.25462	0	High	3.64587	0	1
	LLVESDINSIR	3	1	1	O76011		1258.7	0	0.000112521	High	2.81403	0	High	2.34429	0	High	2.55341	0	0
	NHEEEVNTLR	4	1	1	O76011		1240.59	0	0.0199889	High	2.64606	0	High	2.12978	0	High	1.96696	0	0
	ETMQFLNDR	3	8	6	O76015;Q15323;Q14532;Q14525;O76011;O76009		1153.53	0	0.000212221	High	2.51044	0	High	2.38703	0	High	2.50286	0	0
	ILDELTLCK	2	3	2	Q15323;O76011	C8(Carbamidomethyl)	1104.6	0	9.40417e-06	Low	0.607294	0				High	2.41022	0	0
	SQYEALVEINR	3	1	1	O76011		1321.67	0	0.00134026				High	3.23276	0	High	3.43025	0	0
	LECEINTYR	5	5	5	Q92764;Q15323;Q14525;O76011;O76009	C3(Carbamidomethyl)	1197.56	0.000581	0.00184766	Medium	2.0337	0	High	2.9001	0	High	2.02889	0	0
	TIEELQQK	2	6	5	Q15323;Q14532;Q14525;O76011;O76009		988.531	0.000581	0.00187047				High	2.77279	0	Low	0.924083	0	0
	LASDDFR	3	2	2	O76011;O76009		823.395	0.004528	0.0724986	Medium	1.81964	0	High	1.84696	0	High	2.26765	0	0
	LASYLEK	4	8	5	Q15323;Q14525;O76011;Q9C075;O76009		823.455	0.013241	0.15557	Medium	2.14324	0	Medium	2.13078	0	Medium	1.92823	0	0
	SDLESQVESLREELICLKK	1	1	1	O76011	C16(Carbamidomethyl)	2276.18	0.013683	0.257904	Medium	2.86747	0							2
	CDLER	3	3	2	Q15323;O76011	C1(Carbamidomethyl)	692.303	0.075744	0.506722	Low	1.34068	0	Low	1.14598	0	Low	1.2484	0	0
	SQLGDR	1	1	1	O76011		675.342	0.082825	0.524739	Low	1.13957	0							0
	SKYQTEQSLR	1	1	1	O76011		1239.64	0.73022	1							Low	0.983253	0	1
	LLVESDINSIRR	3	1	1	O76011		1414.8						Low	1.49401	0	Low	1.29938	0	1
	SKYQTEQSLRLLVESDINSIR	1	1	1	O76011	K2(Glycation); Y3(Nitro); R21(MG-H1)	2740.35						Low	1.24797	0				2
	GLQRK	1	2	2	P20929;O76011	K5(HNE)	757.49						Low	0.400962	0				1
O75342	Arachidonate 12-lipoxygenase, 12R-type OS=Homo sapiens GN=ALOX12B PE=1 SV=1 - [LX12B_HUMAN]	54.92	1	18	31	92	68.6332	52.21	27	40	63.9633	35.09	18	22	68.7731	42.51	21	30	701	80.304	7.63525
	Sequence	# PSMs	# Proteins	# Protein Groups	Protein Group Accessions	Modifications	MH+ [Da]	q-Value	PEP	A2	XCorr A2	Probability A2	B2	XCorr B2	Probability B2	C2	XCorr C2	Probability C2	# Missed Cleavages
	IYHFPAYQWMDGYETLALR	3	1	1	O75342	M10(Oxidation)	2390.13	0	0.00945294	High	4.95779	0				High	4.91486	0	0
	ALSELTYDSLYLPNDFVER	4	1	1	O75342		2245.1	0	3.63234e-06	High	4.91592	0	High	5.34996	0	High	4.44808	0	0
	YVTEIITYYYPSDAAVEGDPELQSWVQEIFK	3	1	1	O75342		3653.76	0	8.71136e-05	High	4.8119	0	High	5.20759	0	High	4.59653	0	0
	IPDKFPVTDDMVAPFLGEGTCLQAELEK	4	1	1	O75342	C21(Carbamidomethyl)	3120.52	0	3.43017e-06	High	4.70003	0	High	4.3832	0	High	3.85891	0	1
	RPLGHFPDIHFVEEAPR	3	1	1	O75342		2017.04	0	1.44093e-08	High	4.34824	0	High	3.80765	0	High	4.09172	0	0
	TTADDSLPVLLEHR	6	1	1	O75342		1566.81	0	0.000373072	High	3.9161	0	High	4.53327	0	High	4.56765	0	0
	IYHFPAYQWMDGYETLALR	2	1	1	O75342		2374.13	0	0.00555641	High	3.85288	0	High	3.07792	0				0
	DDSLAVWNALEK	3	1	1	O75342		1360.67	0	4.91604e-06	High	3.66539	0	High	3.5296	0	High	3.51018	0	0
	GMSLGVEGFAGVMVR	1	1	1	O75342	M2(Oxidation); M13(Oxidation)	1541.74	0	0.0101565	High	3.47066	0							0
	LNQISHDIR	4	1	1	O75342		1095.59	0	0.0386319	High	3.43402	0	High	2.9527	0	High	3.37594	0	0
	GLTTLETFMDTLPDVK	2	1	1	O75342	M9(Oxidation)	1796.9	0	0.0311636	High	2.73354	0				High	2.15868	0	0
	GMSLGVEGFAGVMVR	5	1	1	O75342		1509.76	0	5.96886e-08	High	2.69167	0	High	3.49672	0	High	4.2801	0	0
	IMEGIPTVELSGR	3	1	1	O75342	M2(Oxidation)	1417.74	0	4.14287e-05	Medium	1.96209	0	High	1.73366	0	High	2.18005	0	0
	GLTTLETFMDTLPDVK	2	1	1	O75342		1780.9	0	0.000100683							High	2.00433	0	0
	DSISLTIVGTQGESHK	4	1	1	O75342		1671.85	0.000475	0.00368369	High	3.29168	0	High	3.5387	0	High	3.28182	0	0
	YTVQINSIGR	3	1	1	O75342		1150.62	0.000581	0.00134138	High	2.14519	0	High	2.74838	0	High	1.76024	0	0
	GVQDLPGYYYR	4	1	1	O75342		1330.64	0.003348	0.0542558	Medium	2.35308	0	High	1.91897	0	High	2.03342	0	0
	AVLLNEGGLSAK	3	1	1	O75342		1171.67	0.004519	0.0508771	Medium	1.38722	0	High	2.29489	0	Low	0.756889	0	0
	YAFFPK	3	1	1	O75342		772.403	0.020758	0.285191	Medium	1.06226	0	Low	0.775497	0	Medium	0.854984	0	0
	RSIEAFR	1	1	1	O75342		878.484	0.025081	0.348437				Medium	2.14255	0				1
	MMPIAIQLSQTPGPDCPIFLPSDSEWDWLLAK	1	1	1	O75342	C16(Carbamidomethyl)	3656.78	0.026036	0.351567	Medium	3.00433	0							0
	GNIYLADYR	1	1	1	O75342		1084.54	0.08104	0.517941	Low	1.39032	0							0
	SIEAFR	3	1	1	O75342		722.383	0.153322	0.82795	Low	0.850938	0	Low	0.47483	0	Low	0.899321	0	0
	SIEAFRQR	1	1	1	O75342		1006.53	0.615797	1	Low	1.14066	0							1
	ATKFLNLNLRYSFLKTASFFVR	5	1	1	O75342	K3(HNE); Y11(Nitro); K15(Glycation); R22(MG-H1)	3053.61	0.729058	1	Low	2.90123	0				Low	3.07811	0	3
	RHRNPNRPEWNGYIPGFPILINFKATK	4	1	1	O75342	R1(MG-H1); Y13(Nitro); K27(Glycation)	3496.77	0.787901	1	Low	2.12165	0							3
	QDFYHWR	1	1	1	O75342	Y4(Nitro); R7(MG-H1)	1150.46	0.802256	1				Low	0.582914	0				0
	IYHFPAYQWMDGYETLALREATGK	3	1	1	O75342	H3(ONE); Y7(Nitro); R19(MG-H1); K24(Glycation)	3275.53			Low	3.35582	0							1
	HRNPNRPEWNGYIPGFPILINFKATK	2	1	1	O75342	H1(HNE); R2(MG-H1); Y12(Nitro); K23(Glycation)	3496.77			Low	1.98026	0							2
	ERYAFFPK	2	1	1	O75342	R2(MG-H1)	1111.55			Low	1.22622	0							1
	GVQDLPGYYYR	1	1	1	O75342	Y9(Nitro)	1375.62			Low	0.840666	0							0
	VATGTDLLSGTR	1	1	1	O75342	R12(MG-H1)	1244.65			Low	0.704635	0							0
	RCTR	1	1	1	O75342	R1(MG-H1); C2(Carbamidomethyl)	646.306			Low	0.430824	0							1
	QRLNQISHDIRQRNK	1	1	1	O75342	R11(MG-H1); R13(MG-H1); K15(Glycation)	2176.13									Low	1.53817	0	3
	ESSGFPR	1	1	1	O75342	R7(MG-H1)	833.383									Low	1.44032	0	0
	GNIYLADYR	1	1	1	O75342	Y4(Nitro); R9(MG-H1)	1183.53									Low	0.770347	0	0
P81605	Dermcidin OS=Homo sapiens GN=DCD PE=1 SV=2 - [DCD_HUMAN]	53.64	1	5	7	22	13.5886	46.36	5	7	13.0178	48.18	6	8	11.1875	42.73	5	7	110	11.2768	6.53662
	Sequence	# PSMs	# Proteins	# Protein Groups	Protein Group Accessions	Modifications	MH+ [Da]	q-Value	PEP	A2	XCorr A2	Probability A2	B2	XCorr B2	Probability B2	C2	XCorr C2	Probability C2	# Missed Cleavages
	LGKDAVEDLESVGK	4	1	1	P81605		1459.76	0	3.12748e-05	High	4.28335	0	High	3.89689	0	High	4.06361	0	1
	GAVHDVKDVLDSVL	5	1	1	P81605		1466.78	0	0.0312351	High	2.83038	0	High	2.62504	0	Medium	2.27275	0	1
	DAVEDLESVGK	5	1	1	P81605		1161.56	0	0.00180325	High	2.49283	0	Low	1.4525	0	High	2.5907	0	0
	ENAGEDPGLAR	3	1	1	P81605		1128.53	0.000908	0.00187047	High	2.09787	0	High	2.64098	0	Low	1.01926	0	0
	SSLLEK	1	1	1	P81605		676.387	0.009093	0.131954				High	1.30489	0				0
	KAVGGLGK	3	1	1	P81605		729.462	0.232396	1				Low	1.33864	0	Low	1.34687	0	1
	SSLLEKGLDGAK	1	1	1	P81605	K6(Glycation)	1379.73	0.543075	1	Low	1.31583	0							1
P99999	Cytochrome c OS=Homo sapiens GN=CYCS PE=1 SV=2 - [CYC_HUMAN]	53.33	1	1	4	8					1.69221	28.57	3	3	0	53.33	3	5	105	11.7411	9.56885
	Sequence	# PSMs	# Proteins	# Protein Groups	Protein Group Accessions	Modifications	MH+ [Da]	q-Value	PEP	A2	XCorr A2	Probability A2	B2	XCorr B2	Probability B2	C2	XCorr C2	Probability C2	# Missed Cleavages
	TGPNLHGLFGR	1	1	1	P99999		1168.62	0.000908	0.00369463				High	1.69221	0				0
	IFIMK	3	1	1	P99999	M4(Oxidation)	667.385	0.072079	0.666735				Low	1.2033	0	Low	1.4434	0	0
	CSQCHTVEKGGKHKTGPNLHGLFGR	3	1	1	P99999	C1(Carbamidomethyl); C4(Carbamidomethyl); K12(Glycation); H20(ONE)	3121.51						Low	1.77946	0	Low	1.68017	0	3
	NKGIIWGEDTLMEYLENPKKYIPGTK	1	1	1	P99999	Y21(Nitro); K26(HNE)	3238.65									Low	2.07768	0	3
P22735	Protein-glutamine gamma-glutamyltransferase K OS=Homo sapiens GN=TGM1 PE=1 SV=4 - [TGM1_HUMAN]	53	1	30	37	117	80.587	50.06	30	38	86.5363	49.69	33	46	67.1714	41.86	26	33	817	89.7303	6.03662
	Sequence	# PSMs	# Proteins	# Protein Groups	Protein Group Accessions	Modifications	MH+ [Da]	q-Value	PEP	A2	XCorr A2	Probability A2	B2	XCorr B2	Probability B2	C2	XCorr C2	Probability C2	# Missed Cleavages
	EYRPHLVDQGAMLLNVSGHVK	6	1	1	P22735		2363.23	0	1.28535e-12	High	5.81871	0	High	6.41092	0	High	6.40485	0	0
	TWNYGQFDHGVLDACLYILDR	3	1	1	P22735	C15(Carbamidomethyl)	2556.2	0	3.1771e-08	High	5.66625	0	High	5.31134	0	High	4.92648	0	0
	RPDLPSGFDGWQVVDATPQETSSGIFCCGPCSVESIK	3	1	1	P22735	C27(Carbamidomethyl); C28(Carbamidomethyl); C31(Carbamidomethyl)	4083.85	0	3.87567e-10	High	5.44504	0	High	6.03434	0	High	6.36049	0	0
	NEIYILFNPWCPEDIVYVDHEDWR	3	1	1	P22735	C11(Carbamidomethyl)	3122.44	0	0.000190986	High	5.04533	0	High	4.96856	0	High	3.77179	0	0
	GTNPSAWVGSVEILLSYLR	4	1	1	P22735		2062.1	0	1.08775e-09	High	4.27216	0	High	4.87852	0	High	4.66969	0	0
	ILNVGDIGGNETVTLR	4	1	1	P22735		1670.91	0	2.32622e-07	High	3.94129	0	High	4.13408	0	High	4.38571	0	0
	TQSDAGEFQLPFDPR	4	1	1	P22735		1707.8	0	0.00134026	High	3.4204	0	High	4.17121	0	High	3.2863	0	0
	IYYGTEAQIGER	3	1	1	P22735		1399.69	0	0.000136057	High	3.11744	0	High	3.05249	0	High	2.86681	0	0
	ITLELLIGNNPEVGK	3	1	1	P22735		1609.92	0	4.28525e-06	High	2.92269	0	High	4.32374	0	High	3.51896	0	0
	GQPFHMLLLLSR	1	1	1	P22735		1411.79	0	0.0284289	High	2.37957	0							0
	YDTPFIFAEVNSDK	3	1	1	P22735		1645.77	0	2.85779e-09	High	2.36296	0	High	2.9719	0	High	2.95132	0	0
	VHTSPNAIIGK	5	1	1	P22735		1136.64	0	0.00161075	High	1.48683	0	Low	1.92237	0	High	2.19758	0	0
	KAVETAAAHGSKPNVYANR	3	1	1	P22735		1984.04	0	0.00134026				High	4.64071	0	High	4.3163	0	1
	NPLPVTLTNVVFR	3	1	1	P22735		1469.85	0.000475	0.0046477	High	2.62791	0	High	1.57779	0	High	1.64494	0	0
	IVYVEEK	3	1	1	P22735		879.482	0.000475	0.00801505	High	2.27294	0	High	2.3835	0	High	2.20028	0	0
	AVETAAAHGSKPNVYANR	2	1	1	P22735		1855.94	0.000567	0.0502814	High	3.24643	0	High	3.09786	0				0
	QEYVLNESGR	5	1	1	P22735		1194.58	0.000567	0.059664	High	1.96359	0	High	1.91071	0	Low	1.25108	0	0
	EGMLVVNGVDLLSSR	3	1	1	P22735		1588.84	0.000581	0.00134026	High	3.61551	0	High	3.6939	0				0
	ASGQNLNLR	3	1	1	P22735		972.523	0.000581	0.00145858	High	2.02143	0	High	2.73927	0	High	1.53182	0	0
	GSGVNAAGDGTIR	2	1	1	P22735		1174.58	0.000908	0.00187047	High	2.87091	0	High	1.64493	0				0
	LEGSGLQRPK	3	1	1	P22735		1084.61	0.000908	0.00227128	High	2.52279	0	High	2.82899	0				0
	EDITYLYK	4	1	1	P22735		1044.53	0.000908	0.00187047	Medium	1.86538	0	High	1.45432	0	High	1.46527	0	0
	KEVELAPGASDR	7	1	1	P22735		1271.66	0.002127	0.0391148	Medium	1.61267	0	High	2.71826	0	High	3.06226	0	1
	CLGLATR	3	1	1	P22735	C1(Carbamidomethyl)	790.424	0.0022	0.117355	High	1.34466	0	High	1.24171	0	Low	0.916705	0	0
	TWNYGQFDHGVLDACLYILDRR	1	1	1	P22735	C15(Carbamidomethyl)	2712.3	0.002518	0.0223015				High	2.98017	0				1
	GDPVNVSR	3	1	1	P22735		843.432	0.003252	0.164104	High	1.68376	0	Medium	2.26631	0	Medium	1.87123	0	0
	EHHTDEYEYDELIVR	1	1	1	P22735		1947.87	0.003923	0.187731	High	1.53122	0							0
	QSFVPVRPGPR	7	1	1	P22735		1239.7	0.004116	0.0456928	Medium	2.14105	0	High	2.32659	0	Low	1.99737	0	0
	EVELAPGASDR	1	1	1	P22735		1143.56	0.004528	0.074036							High	1.07952	0	0
	GGSGGWK	3	1	1	P22735		648.31	0.038328	0.398032	Medium	1.10186	0	Low	1.07932	0	Low	0.807267	0	0
	VTMPVAYK	1	1	1	P22735		908.491	0.083662	0.819206				Low	1.33827	0				0
	GTHVIIPVGK	3	1	1	P22735		1020.62	0.346484	1	Low	1.32168	0	Low	1.42873	0	Low	1.14387	0	0
	RGMPYGGRGDPVNVSR	3	1	1	P22735	R1(MG-H1); Y5(Nitro); R16(MG-H1)	1870.86	0.615115	1				Low	1.36405	0				2
	HPEGSDAERK	3	1	1	P22735	K10(HNE)	1281.64			Low	0.992294	0	Low	1.44483	0				1
	AIGTLIVTK	3	1	1	P22735		915.587			Low	0.67152	0	Low	0.653481	0	Low	0.544864	0	0
	TWNYGQFDHGVLDACLYILDR	1	1	1	P22735	H9(HNE); C15(Carbamidomethyl)	2712.3						Low	1.47868	0				0
	EDITYLYK	2	1	1	P22735	Y5(Nitro); Y7(Nitro); K8(ONE)	1288.6						Low	1.22393	0	Low	1.14876	0	0
	ESGQVLAK	1	1	1	P22735		831.457						Low	0.999054	0				0
	GMPYGGR	1	1	1	P22735		737.346									Low	0.444011	0	0
Q5T749	Keratinocyte proline-rich protein OS=Homo sapiens GN=KPRP PE=1 SV=1 - [KPRP_HUMAN]	51.99	1	20	25	146	108.532	47.15	22	49	100.096	42.49	22	50	104.137	44.73	22	47	579	64.0932	8.26514
	Sequence	# PSMs	# Proteins	# Protein Groups	Protein Group Accessions	Modifications	MH+ [Da]	q-Value	PEP	A2	XCorr A2	Probability A2	B2	XCorr B2	Probability B2	C2	XCorr C2	Probability C2	# Missed Cleavages
	FSTQCQYQGSYSSCGPQFQSR	7	1	1	Q5T749	C5(Carbamidomethyl); C14(Carbamidomethyl)	2503.04	0	0.000513819	High	6.83597	0	High	6.68011	0	High	5.37829	0	0
	SPSPCWGPNPVPYPGDLGCHESSPHR	6	1	1	Q5T749	C5(Carbamidomethyl); C19(Carbamidomethyl)	2887.27	0	6.35486e-14	High	5.483	0	High	5.02358	0	High	5.32169	0	0
	LDTEAPYCGPSSYNQGQESGAGCGPGDVFPER	3	1	1	Q5T749	C8(Carbamidomethyl); C23(Carbamidomethyl)	3402.43	0	0.0106145	High	4.99554	0	High	3.81947	0	High	2.9002	0	0
	LDTEAPYCGPSSYNQGQESGAGCGPGDVFPERR	4	1	1	Q5T749	C8(Carbamidomethyl); C23(Carbamidomethyl)	3558.53	0	0.0152051	High	4.71557	0	High	4.81762	0	High	4.83602	0	1
	ATCNNYTPQFQLRPSYSSCFPQYR	6	1	1	Q5T749	C3(Carbamidomethyl); C19(Carbamidomethyl)	2985.34	0	0.00386386	High	4.51675	0	High	3.80535	0	High	4.15328	0	0
	RFEPCSSSYLPLRPSEGFPNYCTPPR	7	1	1	Q5T749	C5(Carbamidomethyl); C22(Carbamidomethyl)	3114.46	0	5.00083e-05	High	3.77312	0	High	4.1732	0	High	4.21519	0	1
	LDQCPESPLQR	4	1	1	Q5T749	C4(Carbamidomethyl)	1342.64	0	0.0221278	High	3.41397	0	High	3.23867	0	High	3.0937	0	0
	FEPCSSSYLPLRPSEGFPNYCTPPR	5	1	1	Q5T749	C4(Carbamidomethyl); C21(Carbamidomethyl)	2958.36	0	0.00445739	High	3.05378	0	High	3.2394	0	High	3.52485	0	0
	TSFSPCVPQCQTQGSYGSFTEQHR	7	1	1	Q5T749	C6(Carbamidomethyl); C10(Carbamidomethyl)	2789.21	0	6.08404e-09	High	3.05189	0	High	3.60872	0	High	3.67821	0	0
	RLDQCPESPLQR	7	1	1	Q5T749	C5(Carbamidomethyl)	1498.74	0	0.000233751	High	2.88049	0	High	3.08073	0	High	3.33331	0	1
	SQSCGPQPSWGASCPELRPHVEPRPLPSFCPPR	1	1	1	Q5T749	C4(Carbamidomethyl); C14(Carbamidomethyl); C30(Carbamidomethyl)	3770.78	0	0.0374944	High	2.85634	0							0
	GRPAVCQPQGR	8	1	1	Q5T749	C6(Carbamidomethyl)	1225.62	0	0.0452772	High	2.65592	0	High	2.80144	0	High	3.09084	0	0
	CPVEIPPIR	14	1	1	Q5T749	C1(Carbamidomethyl)	1080.59	0	0.000197673	High	2.59692	0	High	2.77291	0	High	2.63771	0	0
	IEISSPCCPR	3	1	1	Q5T749	C7(Carbamidomethyl); C8(Carbamidomethyl)	1218.56	0	0.000933354	High	2.33185	0	High	2.68219	0	High	2.80069	0	0
	RSEPIYNSR	4	1	1	Q5T749		1121.57	0.000475	0.00834587	High	2.79763	0	High	2.89552	0	High	2.75709	0	1
	LPLQQCCVK	3	1	1	Q5T749	C6(Carbamidomethyl); C7(Carbamidomethyl)	1145.58	0.000475	0.00463944	High	2.65958	0	High	3.18664	0	High	2.91704	0	0
	LQLFPR	7	1	1	Q5T749		773.467	0.000908	0.0060361	Medium	2.02591	0	Medium	1.57342	0	High	1.81408	0	0
	RLQLFPR	9	1	1	Q5T749		929.568	0.002127	0.0367455	High	2.71316	0	High	2.33058	0	High	2.49437	0	1
	CPVEIPPIRR	7	1	1	Q5T749	C1(Carbamidomethyl)	1236.69	0.013683	0.259423	Medium	1.89878	0	Medium	1.3625	0	Medium	2.08407	0	1
	QVPPQR	24	1	1	Q5T749		724.411	0.01577	0.266212	Medium	1.22002	0	Low	1.1887	0	Low	0.899022	0	0
	CPPPAPRPR	2	1	1	Q5T749	C1(Carbamidomethyl)	1047.55	0.11521	0.717293				Low	1.28177	0	Low	1.04939	0	0
	CLPPPR	4	1	1	Q5T749	C1(Carbamidomethyl)	739.392	0.458696	1	Low	0.553626	0	Low	0.90932	0	Low	0.789133	0	0
	SRSTSR	1	1	1	Q5T749	R2(MG-H1)	747.382			Low	0.720519	0							1
	SEPIYNSRCPR	1	1	1	Q5T749	Y5(Nitro); R8(MG-H1); C9(Carbamidomethyl); R11(MG-H1)	1531.65						Low	0.613859	0				1
	RGQDGHGDQGNAFAGVK	2	1	1	Q5T749	H6(ONE); K17(ONE)	2022									Low	1.40583	0	1
Q6UWP8	Suprabasin OS=Homo sapiens GN=SBSN PE=1 SV=2 - [SBSN_HUMAN]	49.15	1	12	17	66	69.3025	44.07	14	32	37.8539	40	11	17	32.2618	40	12	17	590	60.5046	7.00537
	Sequence	# PSMs	# Proteins	# Protein Groups	Protein Group Accessions	Modifications	MH+ [Da]	q-Value	PEP	A2	XCorr A2	Probability A2	B2	XCorr B2	Probability B2	C2	XCorr C2	Probability C2	# Missed Cleavages
	FGQGAHHAAGQAGNEAGR	15	1	1	Q6UWP8		1735.8	0	2.91743e-14	High	4.79917	0	High	4.01509	0	High	5.61703	0	0
	FGQGVHHAAGQAGNEAGR	8	1	1	Q6UWP8		1763.83	0	8.94493e-13	High	4.6481	0	High	4.29533	0	High	3.54018	0	0
	FGQGIHHAAGQVGK	5	1	1	Q6UWP8		1406.73	0	0.000128354	High	3.95092	0	High	3.88133	0	Low	0.863988	0	0
	FGQGVDNAAGQAGNEAGR	3	1	1	Q6UWP8		1718.78	0	0.00133137	High	3.40413	0	High	3.2572	0	High	4.25532	0	0
	FGQGVHHAASQFGK	6	1	1	Q6UWP8		1470.72	0	0.0337145	High	3.14079	0	High	3.27672	0	High	2.87909	0	0
	FGQGVHHTAGQVGK	2	1	1	Q6UWP8		1422.72	0	1.7448e-06	High	2.70853	0				High	3.39357	0	0
	VAHEINHGIGQAGK	2	1	1	Q6UWP8		1430.75	0	0.0455492	High	2.692	0	High	2.81949	0				0
	GVQGLNHGMDK	4	1	1	Q6UWP8	M9(Oxidation)	1171.55	0.000475	0.0105015	High	2.19623	0	High	2.46102	0	High	2.14104	0	0
	FGQGVHHGLSEGWK	2	1	1	Q6UWP8		1538.75	0.000475	0.00787753	High	1.61972	0				High	2.00639	0	0
	VIEGINR	3	1	1	Q6UWP8		800.462	0.000908	0.00842746	Medium	1.35314	0	High	1.95671	0	Low	1.69025	0	0
	FGQGVHHGLSEGWKETEK	1	1	1	Q6UWP8		2025.98	0.001803	0.0168359				High	2.24427	0				1
	ALDGINSGITHAGR	2	1	1	Q6UWP8		1381.72	0.039846	0.443904	Low	1.28809	0	Medium	2.07255	0				0
	FGQGAHHGLSEGWKETEK	2	1	1	Q6UWP8	H6(ONE); H7(HNE); K14(HNE); K18(Glycation)	2626.31	0.662485	1	Low	2.1405	0							1
	GVQGLNHGMDKVAHEINHGIGQAGKEAEK	6	1	1	Q6UWP8	H7(HNE); K11(ONE); H14(HNE)	3490.82	0.766476	1	Low	2.40525	0							2
	FGQGVHHAASQVGK	2	1	1	Q6UWP8		1422.72			Low	2.29052	0				Low	2.83916	0	0
	EAEKLGQGVNHAADQAGK	1	1	1	Q6UWP8	H11(HNE); K18(Glycation)	2141.09						Low	1.39955	0				1
	ETEKFGQGVHHTAGQVGKEAEKFGQGAHHAAGQAGNEAGR	1	1	1	Q6UWP8	K4(ONE); K22(ONE); H28(ONE); R40(MG-H1)	4600.22									Low	2.03486	0	3
	GVQGLNHGMDKVAHEINHGIGQAGKEAEK	1	1	1	Q6UWP8	H7(HNE); M9(Oxidation); K11(ONE); K29(HNE)	3506.81									Low	1.74527	0	2
P02538	Keratin, type II cytoskeletal 6A OS=Homo sapiens GN=KRT6A PE=1 SV=3 - [K2C6A_HUMAN]	47.34	4	8	41	244	139.774	35.82	31	78	166.425	40.96	33	81	147.406	43.44	37	85	564	60.0083	8.00146
	Sequence	# PSMs	# Proteins	# Protein Groups	Protein Group Accessions	Modifications	MH+ [Da]	q-Value	PEP	A2	XCorr A2	Probability A2	B2	XCorr B2	Probability B2	C2	XCorr C2	Probability C2	# Missed Cleavages
	NLDLDSIIAEVKAQYEEIAQR	4	4	2	P02538;P35908	K12(Glycation)	2580.3	0	0.0104269	High	4.77196	0	High	3.5477	0	High	4.89924	0	1
	NLDLDSIIAEVK	23	7	4	Q5XKE5;P02538;P35908;P13647		1329.73	0	3.27487e-05	High	4.11003	0	High	4.02615	0	High	4.23221	0	0
	QNLEPLFEQYINNLR	11	4	2	P02538;P13647		1890.97	0	5.81209e-07	High	3.82241	0	High	4.13384	0	High	4.02229	0	0
	LALDVEIATYRK	6	9	4	Q5XKE5;P02538;P35908;P13647		1391.79	0	9.95429e-06	High	3.76735	0	High	3.4551	0	High	3.70407	0	1
	RQLDSIVGER	4	3	2	P02538;P13647		1172.64	0	4.86656e-05	Medium	3.40622	0	High	3.52988	0	High	3.75142	0	1
	LALDVEIATYR	22	9	4	Q5XKE5;P02538;P35908;P13647		1263.69	0	1.56047e-06	High	3.19496	0	High	3.52527	0	High	2.82344	0	0
	KLLEGEECR	11	10	4	Q86Y46;P35908;P13647;P02538	C8(Carbamidomethyl)	1133.56	0	2.98562e-05	High	3.10567	0	High	3.10723	0	High	3.06207	0	1
	AQYEEIAQR	10	6	2	P02538;P35908		1107.54	0	0.000222616	High	2.98086	0	High	3.04713	0	High	3.22809	0	0
	SGFSSVSVSR	3	1	1	P02538		1012.51	0	0.000244184	High	2.70454	0	High	2.80295	0	High	2.81693	0	0
	DVDAAYMNK	3	6	2	P02538;P13647		1026.46	0	4.30675e-05	High	2.47167	0	High	2.33282	0	High	2.99774	0	0
	WTLLQEQGTK	4	4	2	P02538;P13647		1203.64	0	0.039385	High	2.42483	0	High	2.08266	0	High	1.84262	0	0
	TAAENEFVTLKK	5	4	1	P02538		1350.73	0	0.00225485	High	2.41109	0	High	2.63761	0	High	2.26638	0	1
	ADTLTDEINFLR	5	3	1	P02538		1407.71	0	0.00134026	High	1.88198	0	High	3.08306	0	High	2.6568	0	0
	ISIGGGSCAISGGYGSR	2	3	1	P02538	C8(Carbamidomethyl)	1598.76	0	0.000102356				High	3.89967	0	High	4.35835	0	0
	AIGGGLSSVGGGSSTIK	2	2	1	P02538		1447.77	0	0.000164352				High	3.75549	0	High	3.98129	0	0
	NKYEDEINKR	29	6	3	P02538;P13647;P04264		1308.65	0.000475	0.0090096	High	3.33335	0	High	3.31484	0	High	3.44097	0	2
	DVDAAYMNK	3	6	2	P02538;P13647	M7(Oxidation)	1042.45	0.000475	0.00265674	High	2.51	0	High	2.33104	0	High	2.48621	0	0
	KDVDAAYMNK	3	6	2	P02538;P13647		1154.55	0.000475	0.00411206	High	2.19267	0	High	2.73117	0	High	2.12823	0	1
	QLDSIVGER	3	3	2	P02538;P13647		1016.54	0.000475	0.00271744	High	1.58587	0	High	1.76322	0	High	1.83887	0	0
	QNLEPLFEQYINNLRR	3	4	2	P02538;P13647		2047.07	0.000475	0.00862325	High	1.4969	0	High	1.20342	0	High	1.34871	0	1
	LLEGEECR	6	11	5	Q86Y46;P35908;P13647;P02538;Q8N1N4	C7(Carbamidomethyl)	1005.47	0.000475	0.00912091	Medium	1.01541	0	High	2.75621	0	High	2.81535	0	0
	YEDEINK	3	12	6	Q5XKE5;Q7Z794;P02538;P35908;P13647;P04264		910.415	0.000908	0.00194671	High	2.10795	0	High	1.73702	0	High	2.20207	0	0
	FASFIDK	11	18	6	Q5XKE5;Q86Y46;Q7Z794;P02538;P35908;P13647		827.43	0.000908	0.00554679	High	2.00992	0	High	2.01274	0	High	1.94041	0	0
	FLEQQNK	6	18	6	Q5XKE5;Q8N1N4;P13647;P02538;P78386;O43790		906.468	0.000908	0.00543583	High	1.7396	0	High	1.82447	0	Medium	1.75315	0	0
	YEDEINKR	13	11	5	Q7Z794;P02538;P35908;P13647;P04264		1066.52	0.000923	0.0133839	High	2.33296	0	High	2.2038	0	High	2.16838	0	1
	NKYEDEINK	6	7	4	Q5XKE5;P02538;P13647;P04264		1152.55	0.000923	0.012373	High	2.12815	0	High	1.75297	0	High	2.5497	0	1
	FASFIDKVR	5	17	6	Q5XKE5;Q86Y46;Q7Z794;P02538;P35908;P13647		1082.6	0.001394	0.105287	High	2.09797	0	High	1.51442	0	High	1.83712	0	1
	GRLDSELR	6	5	3	Q5XKE5;P02538;P13647		945.511	0.002564	0.132477	High	2.60572	0	Low	2.74039	0	High	2.3457	0	1
	AEAESWYQTK	2	4	1	P02538		1212.55	0.01294	0.141287	Low	1.34156	0				Medium	1.73554	0	0
	QEIAEINR	1	3	1	P02538		972.51	0.020507	0.266643				Medium	1.29939	0				0
	NKYEDEINK	3	7	4	Q5XKE5;P02538;P13647;P04264	K9(HNE)	1308.66	0.029535	0.382619	Low	2.04931	0				Medium	2.21763	0	1
	YEELQVTAGR	3	3	1	P02538		1165.59	0.033315	0.427229	Low	0.756877	0	Low	0.968001	0	Medium	2.19964	0	0
	LDSELR	3	9	4	Q5XKE5;Q86Y46;P02538;P13647		732.388	0.036895	0.46851	Medium	1.15585	0	Low	1.02993	0	Medium	1.40364	0	0
	LRSEIDHVKK	1	3	1	P02538		1224.71	0.082956	0.692334							Low	2.01293	0	2
	TAAENEFVTLK	1	4	1	P02538		1222.63	0.124228	0.724613							Low	1.34178	0	0
	DVDAAYMNKVELQAK	3	4	1	P02538	M7(Oxidation)	1710.84	0.337838	1	Low	1.57586	0	Low	1.8732	0	Low	1.56461	0	1
	GMQDLVEDFKNKYEDEINK	3	1	1	P02538	K12(ONE); K19(ONE)	2623.3	0.785822	1				Low	2.11843	0	Low	2.39266	0	2
	MIQRLRSEIDHVK	2	3	1	P02538	M1(Oxidation); H11(HNE)	1797.01			Low	1.46621	0							2
	LDSELRGMQDLVEDFKNK	1	1	1	P02538	K18(Glycation)	2299.12			Low	1.22661	0							2
	YEDEINKR	3	11	5	Q7Z794;P02538;P35908;P13647;P04264	Y1(Nitro)	1111.5			Low	0.894758	0	Low	0.899543	0	Low	0.711236	0	1
	YTTTSSSSRK	1	3	1	P02538	R9(MG-H1)	1171.55						Low	0.878308	0				1
	GMQDLVEDFKNKYEDEINKR	2	1	1	P02538	M2(Oxidation); K10(HNE); K19(Glycation)	2805.36									Low	1.85962	0	3
	LEGLEDALQKAK	1	3	1	P02538		1314.72									Low	0.828004	0	1
	GMQDLVEDFK	1	1	1	P02538	M2(Oxidation)	1197.55									Low	0.640158	0	0
	NKYEDEINK	1	7	4	Q5XKE5;P02538;P13647;P04264	Y3(Nitro)	1197.55									Low	0.593431	0	1
O60911	Cathepsin L2 OS=Homo sapiens GN=CTSV PE=1 SV=2 - [CATL2_HUMAN]	46.41	1	5	11	17	6.74205	14.67	5	5	2.51471	27.84	7	7	10.4585	20.66	5	5	334	37.3051	8.76318
	Sequence	# PSMs	# Proteins	# Protein Groups	Protein Group Accessions	Modifications	MH+ [Da]	q-Value	PEP	A2	XCorr A2	Probability A2	B2	XCorr B2	Probability B2	C2	XCorr C2	Probability C2	# Missed Cleavages
	VFREPLFLDLPK	3	1	1	O60911		1473.85	0	0.0268906	High	3.1432	0	High	2.51471	0	High	2.25197	0	1
	FDQNLDTK	2	1	1	O60911		980.469	0.000475	0.00951063	High	1.97929	0				High	2.12297	0	0
	LYGANEEGWR	1	1	1	O60911		1194.55	0.000908	0.0110244				High	1.14707	0				0
	AFQYVK	3	1	1	O60911		755.409	0.003554	0.176074	High	1.45176	0	Medium	1.29858	0	Medium	1.73593	0	0
	SGIYFEPDCSSK	2	1	1	O60911	C9(Carbamidomethyl)	1389.6	0.018709	0.259666				Low	1.12436	0	Medium	1.7899	0	0
	GYVTPVK	1	1	1	O60911		763.435	0.11158	0.580355	Low	1.61956	0							0
	TGKLVSLSEQNLVDCSRPQGNQGCNGGFMARAFQYVK	1	1	1	O60911	K3(HNE); C15(Carbamidomethyl); R17(MG-H1); C24(Carbamidomethyl); Y35(Nitro); K37(HNE)	4528.19	0.770682	1							Low	2.55772	0	2
	NMKMIELHNGEYSQGK	1	1	1	O60911	H8(HNE); Y12(Nitro); K16(HNE)	2236.11			Low	1.11749	0							1
	NSWGPEWGSNGYVKIAKDK	1	1	1	O60911	K14(Glycation); K17(Glycation); K19(Glycation)	2622.2						Low	1.66443	0				2
	HGFTMAMNAFGDMTNEEFRQMMGCFRNQKFR	1	1	1	O60911	H1(ONE); M21(Oxidation); M22(Oxidation); C24(Carbamidomethyl)	3975.7						Low	1.42625	0				3
	NQKFRKGK	1	1	1	O60911	K3(Glycation); R5(MG-H1); K6(Glycation)	1383.72						Low	0.734662	0				3
Q8IW75	Serpin A12 OS=Homo sapiens GN=SERPINA12 PE=1 SV=1 - [SPA12_HUMAN]	45.65	1	12	23	49	26.8312	35.27	14	16	25.6948	30.43	14	18	32.5917	35.75	14	15	414	47.145	9.29053
	Sequence	# PSMs	# Proteins	# Protein Groups	Protein Group Accessions	Modifications	MH+ [Da]	q-Value	PEP	A2	XCorr A2	Probability A2	B2	XCorr B2	Probability B2	C2	XCorr C2	Probability C2	# Missed Cleavages
	NFYSAETILTNFQNLEMAQK	2	1	1	Q8IW75	M17(Oxidation)	2378.13	0	0.0047506	High	5.06022	0				High	5.05595	0	0
	IDKPYLLLIYSEK	5	1	1	Q8IW75		1594.91	0	0.00649467	High	3.98012	0	High	3.43107	0	High	3.18806	0	0
	LSIGNTLFIDQR	3	1	1	Q8IW75		1376.75	0	2.75717e-06	High	3.25102	0	High	2.64335	0	High	3.44716	0	0
	SGIYQVGYDDK	2	1	1	Q8IW75		1244.58	0	0.0350289	High	3.15963	0				High	2.65628	0	0
	IPSVLFLGK	3	1	1	Q8IW75		973.608	0	0.00103247	High	2.48995	0	High	2.35216	0	High	2.23589	0	0
	IFEEHGDLTK	6	1	1	Q8IW75		1188.59	0	0.000292877	High	2.46032	0	High	2.36717	0	High	2.39576	0	0
	DLHEGFHYIIHELTQK	1	1	1	Q8IW75		1980	0	2.59806e-06							High	3.66846	0	0
	ALSEVQGWK	1	1	1	Q8IW75		1017.54	0	0.000692257							High	3.00825	0	0
	LSCTILEIPYQK	3	1	1	Q8IW75	C3(Carbamidomethyl)	1464.78	0.000475	0.00415382	High	3.19109	0	High	2.95432	0	High	2.54804	0	0
	VVDVSVPR	3	1	1	Q8IW75		870.504	0.000923	0.0134936				High	2.01006	0	High	2.39982	0	0
	QINDFISQK	3	1	1	Q8IW75		1092.57	0.002127	0.0214317	Medium	1.51148	0	Medium	1.7383	0	High	1.988	0	0
	FLEDAK	1	1	1	Q8IW75		722.372	0.021783	0.29624				Medium	1.94902	0				0
	QGFNFR	3	1	1	Q8IW75		768.379	0.070086	0.489233	Low	0.830206	0	Low	1.03444	0	Low	0.625389	0	0
	HLEKGLQVDTFSR	1	1	1	Q8IW75	H1(HNE); K4(Glycation); R13(MG-H1)	1901.97	0.73984	1	Low	1.37781	0							1
	GLQVDTFSRWKTLLSR	1	1	1	Q8IW75	K11(Glycation); R16(MG-H1)	2123.09			Low	1.47436	0							2
	ALSEVQGWKQRMAAKELAR	1	1	1	Q8IW75	R11(MG-H1); M12(Oxidation); K15(Glycation)	2404.21			Low	1.43337	0							3
	QRMAAKELAR	1	1	1	Q8IW75	R2(MG-H1); M3(Oxidation); K6(HNE)	1399.78			Low	0.724294	0							2
	LQPQR	3	1	1	Q8IW75		641.373			Low	0.707857	0	Low	0.489771	0	Low	0.584573	0	0
	IDKPYLLLIYSEKIPSVLFLGK	2	1	1	Q8IW75	K3(Glycation); Y10(Nitro); K22(Glycation)	2918.57						Low	3.3258	0				1
	MPEKDLHEGFHYIIHELTQKTQDLK	1	1	1	Q8IW75	H7(HNE); H15(ONE)	3360.73						Low	1.40566	0				2
	QINDFISQKTHGK	1	1	1	Q8IW75		1515.8						Low	0.907622	0				1
	WKTLLSR	1	1	1	Q8IW75		903.547						Low	0.53578	0				1
	MAAKELAR	1	1	1	Q8IW75	M1(Oxidation); K4(Glycation)	1067.55									Low	1.23736	0	1
P20618	Proteasome subunit beta type-1 OS=Homo sapiens GN=PSMB1 PE=1 SV=2 - [PSB1_HUMAN]	45.64	1	5	10	19	5.49912	17.43	4	5	9.57544	41.91	8	10	6.23801	21.58	4	4	241	26.4724	8.1333
	Sequence	# PSMs	# Proteins	# Protein Groups	Protein Group Accessions	Modifications	MH+ [Da]	q-Value	PEP	A2	XCorr A2	Probability A2	B2	XCorr B2	Probability B2	C2	XCorr C2	Probability C2	# Missed Cleavages
	NMQNVEHVPLSLDR	2	1	1	P20618		1651.82	0	1.77479e-05	High	2.52904	0				High	2.69278	0	0
	AGGSASAMLQPLLDNQVGFK	2	1	1	P20618		2004.02	0	2.90587e-05				High	3.94239	0	High	3.54524	0	0
	NMQNVEHVPLSLDR	2	1	1	P20618	M2(Oxidation)	1667.82	0.000581	0.00134026	High	2.97008	0	High	2.08016	0				0
	LSEGFSIHTR	3	1	1	P20618		1146.59	0.000581	0.00182658				High	1.95135	0				0
	ICIVTK	2	1	1	P20618	C2(Carbamidomethyl)	733.428	0.003554	0.178782	High	1.20539	0	High	1.40632	0				0
	DVYTGDALR	2	1	1	P20618		1009.5	0.032156	0.376467	Medium	1.49397	0				Low	1.12024	0	0
	EETVSLRKD	1	1	1	P20618	R7(MG-H1); K8(ONE)	1284.67	0.202484	1							Low	0.868913	0	2
	LVKDVFISAAERDVYTGDALRICIVTK	1	1	1	P20618	R12(MG-H1); Y15(Nitro); R21(MG-H1); C23(Carbamidomethyl); K27(ONE)	3359.75	0.74557	1				Low	0.827595	0				3
	MLSSTAMYSAPGR	1	1	1	P20618	M1(Oxidation)	1387.62			Low	0.797821	0							0
	LSEGFSIHTRDSPKCYK	1	1	1	P20618	R10(MG-H1); K14(ONE); C15(Carbamidomethyl); Y16(Nitro)	2278.08						Low	1.63749	0				2
	LKMYKHSNNK	1	1	1	P20618	M3(Oxidation); Y4(Nitro)	1323.65						Low	1.60154	0				2
	MLSSTAMYSAPGR	1	1	1	P20618	M7(Oxidation); Y8(Nitro); R13(MG-H1)	1486.62						Low	0.716452	0				0
P31151	Protein S100-A7 OS=Homo sapiens GN=S100A7 PE=1 SV=4 - [S10A7_HUMAN]	44.55	1	2	7	22	6.18156	26.73	3	6	6.10425	33.66	5	8	12.7444	40.59	5	8	101	11.4636	6.771
	Sequence	# PSMs	# Proteins	# Protein Groups	Protein Group Accessions	Modifications	MH+ [Da]	q-Value	PEP	A2	XCorr A2	Probability A2	B2	XCorr B2	Probability B2	C2	XCorr C2	Probability C2	# Missed Cleavages
	KIDFSEFLSLLGDIATDYHK	4	1	1	P31151		2312.18	0	2.95941e-12	High	4.01008	0	High	4.2837	0	High	4.66507	0	1
	IDFSEFLSLLGDIATDYHK	1	1	1	P31151		2184.08	0	0.00134026				High	1.59378	0				0
	IDFSEFLSLLGDIATDYHK	6	1	1	P31151	Y17(Nitro); H18(ONE)	2383.16			Low	2.17148	0	Low	1.81636	0	Low	1.87593	0	0
	KDKNEDK	7	1	1	P31151	K3(Glycation); K7(HNE)	1194.61			Low	1.31979	0	Low	1.39327	0	Low	1.30495	0	2
	YTRRDDK	1	1	1	P31151	Y1(Nitro); R3(MG-H1); R4(MG-H1)	1106.48						Low	0.791637	0				2
	YTRR	1	1	1	P31151	R3(MG-H1); R4(MG-H1)	703.356						Low	0.49866	0				1
	DDKIEKPSLLTMMK	1	1	1	P31151	K3(ONE); M12(Oxidation); M13(Oxidation)	1834.96									Low	1.64643	0	1
	IEKPSLLTMMK	1	1	1	P31151	K3(ONE); M9(Oxidation); M10(Oxidation)	1476.79									Low	1.18802	0	0
Q8NEX9	Short-chain dehydrogenase/reductase family 9C member 7 OS=Homo sapiens GN=SDR9C7 PE=1 SV=1 - [DR9C7_HUMAN]	44.41	1	7	12	23	9.01722	20.13	6	7	12.1496	37.38	10	11	5.01584	17.57	5	5	313	35.2403	9.15869
	Sequence	# PSMs	# Proteins	# Protein Groups	Protein Group Accessions	Modifications	MH+ [Da]	q-Value	PEP	A2	XCorr A2	Probability A2	B2	XCorr B2	Probability B2	C2	XCorr C2	Probability C2	# Missed Cleavages
	LPTPVTDFILSR	3	1	1	Q8NEX9		1358.77	0	1.22169e-05	High	2.61616	0	High	3.23156	0	High	3.08871	0	0
	VAVIGGGYCVSK	4	1	1	Q8NEX9	C9(Carbamidomethyl)	1209.63	0	0.024705	High	2.43352	0	High	1.85858	0	High	1.92713	0	0
	YVFITGCDSGFGNLLAK	1	1	1	Q8NEX9	C7(Carbamidomethyl)	1861.92	0.000581	0.00134026				High	3.6731	0				0
	VRDVINSMEHAIVSR	1	1	1	Q8NEX9		1725.91	0.000581	0.00134026				High	3.38639	0				1
	AAAQWVR	1	1	1	Q8NEX9		801.437	0.001821	0.11477	High	2.16791	0							0
	LLYIPLAK	3	1	1	Q8NEX9		930.602	0.002518	0.0395915	High	1.39034	0	High	1.57608	0	Low	0.693774	0	0
	GMQVLAACFTEEGSQK	2	1	1	Q8NEX9	C8(Carbamidomethyl)	1755.8	0.004116	0.0476553	Medium	1.79964	0	High	1.51599	0				0
	LQRDTSYR	3	1	1	Q8NEX9		1038.53	0.517427	0.989363	Low	0.891588	0	Low	0.812682	0	Low	0.982724	0	1
	ELYYFGVK	1	1	1	Q8NEX9	Y3(Nitro); Y4(Nitro); K8(HNE)	1264.62	0.573856	1				Low	0.869611	0				0
	VVNMSSSGGRVAVIGGGYCVSK	1	1	1	Q8NEX9	C19(Carbamidomethyl)	2184.07						Low	1.74647	0				1
	RELYYFGVKVCIIEPGNYR	1	1	1	Q8NEX9	Y4(Nitro); Y5(Nitro); C11(Carbamidomethyl); Y18(Nitro); R19(MG-H1)	2565.17						Low	1.18546	0				2
	ELYYFGVK	1	1	1	Q8NEX9	Y4(Nitro)	1063.51						Low	0.656147	0				0
	LPQETRDSYGEDYFR	1	1	1	Q8NEX9	R6(MG-H1); Y13(Nitro)	1974.83									Low	0.698431	0	1
Q5T750	Skin-specific protein 32 OS=Homo sapiens GN=XP32 PE=1 SV=1 - [XP32_HUMAN]	43.2	1	9	13	69	43.8726	43.2	12	27	36.4094	43.2	12	22	37.2241	43.2	12	20	250	26.2193	7.97217
	Sequence	# PSMs	# Proteins	# Protein Groups	Protein Group Accessions	Modifications	MH+ [Da]	q-Value	PEP	A2	XCorr A2	Probability A2	B2	XCorr B2	Probability B2	C2	XCorr C2	Probability C2	# Missed Cleavages
	GPACCDHEDDCCC	8	1	1	Q5T750	C4(Carbamidomethyl); C5(Carbamidomethyl); C11(Carbamidomethyl); C12(Carbamidomethyl); C13(Carbamidomethyl)	1655.47	0	0.0137736	High	3.96545	0	High	3.73299	0	High	3.84073	0	0
	CPVPCQTQTVCVTGPAPCPTQTYVK	3	1	1	Q5T750	C1(Carbamidomethyl); C5(Carbamidomethyl); C11(Carbamidomethyl); C18(Carbamidomethyl)	2849.31	0	0.0347573	High	3.87399	0	High	4.43792	0	High	4.08394	0	0
	SRGPACCDHEDDCCC	9	1	1	Q5T750	C6(Carbamidomethyl); C7(Carbamidomethyl); C13(Carbamidomethyl); C14(Carbamidomethyl); C15(Carbamidomethyl)	1898.6	0	4.54497e-06	High	3.81791	0	High	4.07191	0	High	4.21524	0	1
	CPAPCQTTYVK	3	1	1	Q5T750	C1(Carbamidomethyl); C5(Carbamidomethyl)	1324.6	0	0.000981103	High	2.48911	0	High	2.80331	0	High	2.30648	0	0
	CPAPCQMTYIK	3	1	1	Q5T750	C1(Carbamidomethyl); C5(Carbamidomethyl)	1368.61	0	0.00012173	High	2.33274	0	High	2.10498	0	High	2.52163	0	0
	CPTPCQTYVK	5	1	1	Q5T750	C1(Carbamidomethyl); C5(Carbamidomethyl)	1253.57	0	0.0446175	High	2.31824	0	High	2.36257	0	High	2.29571	0	0
	TFGVSPLR	10	1	1	Q5T750		876.494	0.000475	0.00257396	High	2.12421	0	High	2.09754	0	High	2.19502	0	0
	YPTPCQTYVK	8	1	1	Q5T750	C5(Carbamidomethyl)	1256.6	0.000475	0.00307852	High	2.02803	0	High	2.136	0	High	2.32592	0	0
	CPAPCQMTYIK	2	1	1	Q5T750	C1(Carbamidomethyl); C5(Carbamidomethyl); M7(Oxidation)	1384.61	0.000923	0.0110423	High	2.42582	0				High	2.41265	0	0
	CPAPCQR	4	1	1	Q5T750	C1(Carbamidomethyl); C5(Carbamidomethyl)	888.382	0.005574	0.0676894	Medium	1.86342	0	High	1.65528	0	Medium	1.7142	0	0
	TFGVSPLRR	7	1	1	Q5T750		1032.59	0.078163	0.51367	Low	1.46761	0	Low	1.55469	0	Low	1.49385	0	1
	CPTPCQTYVKCPAPCQMTYIK	2	1	1	Q5T750	C1(Carbamidomethyl); C5(Carbamidomethyl); C11(Carbamidomethyl); C15(Carbamidomethyl); Y19(Nitro); K21(HNE)	2804.26			Low	1.79376	0				Low	1.78786	0	1
	QPQFPPSCVK	3	1	1	Q5T750	C8(Carbamidomethyl)	1187.59			Low	0.732655	0	Low	0.684039	0	Low	0.691817	0	0
	YPTPCQTYVKCPAPCQTTYVKCPTPCQTYVK	1	1	1	Q5T750	Y1(Nitro); C5(Carbamidomethyl); C11(Carbamidomethyl); C15(Carbamidomethyl); K21(Glycation); C22(Carbamidomethyl); C26(Carbamidomethyl); Y29(Nitro)	4048.72						Low	0.819711	0				2
	YPTPCQTYVK	1	1	1	Q5T750	Y1(Nitro); C5(Carbamidomethyl)	1301.58						Low	0.702699	0				0
Q02413	Desmoglein-1 OS=Homo sapiens GN=DSG1 PE=1 SV=2 - [DSG1_HUMAN]	42.9	2	28	37	192	172.263	40.13	29	61	185.701	41.94	34	68	173.618	40.9	30	63	1049	113.676	5.03369
	Sequence	# PSMs	# Proteins	# Protein Groups	Protein Group Accessions	Modifications	MH+ [Da]	q-Value	PEP	A2	XCorr A2	Probability A2	B2	XCorr B2	Probability B2	C2	XCorr C2	Probability C2	# Missed Cleavages
	ILDVNDNIPYMEQSSYTIEIQENTLNSNLLEIR	3	1	1	Q02413		3881.91	0	0.00338248	High	5.71136	0	High	5.23367	0	High	5.19238	0	0
	ISGVGIDQPPYGIFVINQK	3	1	1	Q02413		2045.11	0	2.787e-08	High	5.55299	0	High	5.47938	0	High	5.18199	0	0
	TMNNFLDREQYGQYALAVR	3	1	1	Q02413	M2(Oxidation)	2305.1	0	0.00187023	High	5.26954	0	High	4.68625	0	High	5.19539	0	1
	TMNNFLDREQYGQYALAVR	3	1	1	Q02413		2289.11	0	0.00865182	High	4.9219	0	Low	1.53204	0	High	2.77305	0	1
	GSDRDGGADGMSAECECNIK	3	1	1	Q02413	M11(Oxidation); C15(Carbamidomethyl); C17(Carbamidomethyl)	2144.83	0	3.07258e-07	High	4.84518	0	High	4.62425	0	High	3.83347	0	1
	ASAISVTVLNVIEGPVFRPGSK	7	1	1	Q02413		2241.26	0	1.54111e-07	High	4.67109	0	High	5.10881	0	High	4.51746	0	0
	GSDRDGGADGMSAECECNIK	4	1	1	Q02413	C15(Carbamidomethyl); C17(Carbamidomethyl)	2128.83	0	1.19321e-09	High	4.57172	0	High	4.21063	0	High	4.63918	0	1
	VVKPLDYEAMQSLQLSIGVR	7	1	1	Q02413		2246.22	0	5.96187e-11	High	4.51201	0	High	4.93302	0	High	4.80759	0	0
	EGGLNMNFMESYFCQK	4	1	1	Q02413	M6(Oxidation); M9(Oxidation); C14(Carbamidomethyl)	1986.8	0	0.0109918	High	4.49749	0	High	3.88421	0	High	4.31052	0	0
	YQGTILSIDDNLQR	6	1	1	Q02413		1635.83	0	3.53516e-08	High	4.48485	0	High	4.60233	0	High	4.70978	0	0
	DITTVIPQIPPDNANIIECIDNSGVYTNEYGGR	19	1	1	Q02413	C19(Carbamidomethyl)	3648.75	0	1.26264e-05	High	4.04977	0	High	4.70649	0	High	4.30388	0	0
	VVKPLDYEAMQSLQLSIGVR	4	1	1	Q02413	M10(Oxidation)	2262.22	0	0.00237316	High	4.04445	0	High	4.97885	0	High	4.02342	0	0
	YVMGNNPADLLAVDSR	4	1	1	Q02413	M3(Oxidation)	1750.84	0	0.00254758	High	4.01855	0	High	4.75556	0	High	3.86951	0	0
	YVMGNNPADLLAVDSR	4	1	1	Q02413		1734.85	0	1.01316e-10	High	3.96915	0	High	4.04115	0	High	3.8799	0	0
	IHSDCAANQQVTYR	8	1	1	Q02413	C5(Carbamidomethyl)	1662.77	0	2.60355e-10	High	3.96474	0	High	4.04795	0	High	4.90195	0	0
	TYVVTGNMGSNDK	3	1	1	Q02413	M8(Oxidation)	1401.63	0	0.0115365	High	3.80123	0	High	3.12599	0	High	3.54372	0	0
	ILDVNDNIPYMEQSSYTIEIQENTLNSNLLEIR	4	1	1	Q02413	M11(Oxidation)	3897.91	0	1.8884e-09	High	3.75925	0	High	5.64311	0	High	5.16706	0	0
	TSGMPEICQEYSGTLR	3	1	1	Q02413	M4(Oxidation); C8(Carbamidomethyl)	1844.82	0	7.6958e-09	High	3.70616	0	High	4.11987	0	High	3.5432	0	0
	VGDFVATDLDTGRPSTTVR	6	1	1	Q02413		2007.02	0	2.21796e-05	High	3.5262	0	High	3.03011	0	High	3.12372	0	0
	TSGMPEICQEYSGTLR	4	1	1	Q02413	C8(Carbamidomethyl)	1828.82	0	8.8579e-07	High	3.40963	0	High	3.68473	0	High	2.84019	0	0
	SAAGFEPVPECSDGAIHSWAVEGPQPEPR	3	1	1	Q02413	C11(Carbamidomethyl)	3077.4	0	5.55742e-06	High	3.34016	0	High	2.99228	0	High	2.59479	0	0
	QEPSDSPMFIINR	4	1	1	Q02413		1533.74	0	5.11978e-05	High	3.11655	0	High	2.95905	0	High	2.97178	0	0
	TYVVTGNMGSNDK	3	1	1	Q02413		1385.64	0	7.52789e-07	High	3.09112	0	High	3.47348	0	High	2.73924	0	0
	EMQDLGGGER	4	1	1	Q02413		1091.48	0	2.93674e-05	High	2.72033	0	High	2.64566	0	High	2.88507	0	0
	MTGFELTEGVK	4	1	1	Q02413		1211.6	0	0.0192511	High	2.71461	0	High	2.20249	0	Low	1.50755	0	0
	QEPSDSPMFIINR	4	1	1	Q02413	M8(Oxidation)	1549.73	0	1.74155e-06	High	2.66769	0	High	3.01345	0	High	2.94378	0	0
	EMQDLGGGER	3	1	1	Q02413	M2(Oxidation)	1107.47	0	0.00162358	High	2.59194	0	High	2.56611	0	High	2.64631	0	0
	ALNSMGQDLERPLELR	3	1	1	Q02413	M5(Oxidation)	1857.95	0	0.022362	High	2.5292	0	High	2.0345	0	High	2.03075	0	0
	EVTPFFIIYCR	5	1	1	Q02413	C10(Carbamidomethyl)	1444.73	0	0.0374775	High	2.44251	0	High	2.27899	0	High	2.08933	0	0
	EQYGQYALAVR	3	1	1	Q02413		1297.65	0	0.000131211	High	1.6963	0	High	2.48686	0	High	2.35988	0	0
	DGGADGMSAECECNIK	2	1	1	Q02413	M7(Oxidation); C11(Carbamidomethyl); C13(Carbamidomethyl)	1729.65	0	3.24955e-06				High	3.84917	0				0
	ALNSMGQDLERPLELR	5	1	1	Q02413		1841.95	0.000475	0.00405219	High	2.78423	0	High	3.15991	0	High	3.06665	0	0
	AEFHHSIMSQYK	1	1	1	Q02413		1477.69	0.000581	0.00134026				High	3.31134	0				0
	EQYNMLGGK	3	1	1	Q02413		1039.49	0.000972	0.0656317	High	1.46749	0	High	1.45168	0	High	1.64323	0	0
	TNVGILK	4	1	1	Q02413		744.461	0.002518	0.0360152	Low	2.20628	0	High	2.11497	0	Medium	2.10652	0	0
	EQYNMLGGK	4	1	1	Q02413	M5(Oxidation)	1055.48	0.002518	0.0296327	Medium	1.52048	0	High	1.8139	0	High	1.74457	0	0
	LADISLGK	2	1	1	Q02413		816.483	0.002923	0.146302	High	1.50869	0	High	1.53558	0				0
	FAAACR	3	2	1	Q02413	C5(Carbamidomethyl)	695.33	0.005949	0.0741079	Medium	1.53962	0	High	1.30099	0	Medium	1.19579	0	0
	NTGEIR	3	1	1	Q02413		689.358	0.033558	0.419698				Medium	1.32162	0	Low	1.28253	0	0
	EQYNMLGGK	9	1	1	Q02413	K9(HNE)	1195.6	0.258111	1	Low	2.63113	0	Low	2.24834	0	Low	2.10057	0	0
	EGEDNSK	1	1	1	Q02413	K7(ONE)	932.419	0.526172	1							Low	0.549825	0	0
	DYNTK	2	1	1	Q02413		640.298	0.654025	1	Low	0.561426	0	Low	0.638007	0				0
	AEFHHSIMSQYKLK	2	1	1	Q02413	H5(ONE); M8(Oxidation); K12(Glycation)	2051			Low	1.77436	0				Low	2.04848	0	1
	EMQDLGGGERMTGFELTEGVK	3	1	1	Q02413	M2(Oxidation); K21(HNE)	2456.18			Low	1.64996	0	Low	2.06201	0				1
	EGEDNSKR	2	2	1	Q02413	K7(Glycation)	1096.48			Low	0.564857	0				Low	0.929709	0	1
	NKAEFHHSIMSQYK	1	1	1	Q02413	M10(Oxidation)	1735.82						Low	1.90133	0				1
	SRITKYSTVQYSK	2	1	1	Q02413	K5(HNE); Y6(Nitro); Y11(Nitro)	1806.94						Low	1.43649	0	Low	1.61874	0	2
	NKAEFHHSIMSQYK	2	1	1	Q02413	H6(HNE); Y13(Nitro); K14(Glycation)	2082.97						Low	1.38174	0	Low	1.52803	0	1
	RNSMRECR	1	1	1	Q02413	M4(Oxidation); R5(MG-H1); C7(Carbamidomethyl); R8(MG-H1)	1232.52						Low	0.754267	0				2
	TMNNFLDR	1	1	1	Q02413	M2(Oxidation)	1026.47						Low	0.580709	0				0
	TYVVTGNMGSNDK	1	1	1	Q02413	M8(Oxidation); K13(ONE)	1555.74									Low	0.817618	0	0
P04040	Catalase OS=Homo sapiens GN=CAT PE=1 SV=3 - [CATA_HUMAN]	42.88	3	18	24	67	39.9601	37.19	19	23	50.6078	40.99	21	25	29.9741	33.4	17	19	527	59.7188	7.38623
	Sequence	# PSMs	# Proteins	# Protein Groups	Protein Group Accessions	Modifications	MH+ [Da]	q-Value	PEP	A2	XCorr A2	Probability A2	B2	XCorr B2	Probability B2	C2	XCorr C2	Probability C2	# Missed Cleavages
	GAGAFGYFEVTHDITK	3	1	1	P04040		1712.83	0	2.58999e-05	High	4.45176	0	High	4.21936	0	High	4.67633	0	0
	GPLLVQDVVFTDEMAHFDR	4	1	1	P04040	M14(Oxidation)	2205.06	0	0.00608269	High	3.54339	0	High	3.71655	0	High	2.97793	0	0
	LVNANGEAVYCK	2	1	1	P04040	C11(Carbamidomethyl)	1337.65	0	0.00101245	High	3.2664	0	High	2.57964	0				0
	FNTANDDNVTQVR	3	1	1	P04040		1493.7	0	0.00643513	High	3.25948	0	High	3.58122	0	High	2.98472	0	0
	ADVLTTGAGNPVGDK	3	1	1	P04040		1414.72	0	1.05754e-05	High	3.22262	0	High	2.53565	0	High	3.07978	0	0
	ADVLTTGAGNPVGDKLNVITVGPR	3	1	1	P04040		2364.29	0	0.000358369	High	2.5715	0	High	3.984	0	High	3.07334	0	1
	AFYVNVLNEEQR	4	1	1	P04040		1481.74	0	0.000305785	High	2.32469	0	High	3.51016	0	High	4.01035	0	0
	LFAYPDTHR	6	1	1	P04040		1119.56	0	0.00010016	High	2.31985	0	High	2.39056	0	High	2.63158	0	0
	VWPHKDYPLIPVGK	3	1	1	P04040		1648.92	0	0.0005486	High	2.25498	0	High	2.31857	0	High	2.34579	0	1
	LCENIAGHLK	2	1	1	P04040	C2(Carbamidomethyl)	1154.6	0	0.000143279	Medium	1.84151	0				High	2.47256	0	0
	NFTEVHPDYGSHIQALLDK	1	1	1	P04040		2184.07	0	4.92038e-05				High	4.42176	0				0
	LNVITVGPR	1	1	1	P04040		968.589	0	0.000548652				High	2.76627	0				0
	LGPNYLHIPVNCPYR	3	1	1	P04040	C12(Carbamidomethyl)	1812.92	0.000475	0.00664289	High	2.25719	0	High	1.40452	0	High	1.92243	0	0
	LSQEDPDYGIR	3	1	1	P04040		1292.61	0.000581	0.00134026	High	1.70978	0	High	2.34182	0	Low	0.96507	0	0
	DPILFPSFIHSQK	4	1	1	P04040		1528.82	0.000908	0.00219575	High	2.65957	0	High	2.26795	0	High	1.72168	0	0
	VFEHIGK	2	1	1	P04040		829.457	0.002518	0.0264241	High	2.09502	0	High	1.90549	0				0
	VANYQR	3	1	1	P04040		750.39	0.003554	0.182631	High	1.65739	0	Medium	1.60435	0	Medium	1.58424	0	0
	LVLNR	6	4	2	O14818;P04040		614.399	0.011288	0.124963	Low	1.07996	0	Low	1.32297	0	Medium	1.31527	0	0
	DYPLIPVGK	3	1	1	P04040		1001.57	0.017305	0.245001	Medium	1.43752	0	Low	1.21971	0	Medium	1.33481	0	0
	HRLGPNYLHIPVNCPYR	1	1	1	P04040	H1(HNE); R2(MG-H1); H9(HNE); C14(Carbamidomethyl); R17(MG-H1)	2526.32	0.597441	1				Low	1.56197	0				1
	VWPHKDYPLIPVGK	1	1	1	P04040	Y7(Nitro); K14(Glycation)	1855.94			Low	1.45275	0							1
	GAGAFGYFEVTHDITKYSKAK	1	1	1	P04040	H12(ONE); Y17(Nitro); K19(ONE)	2643.34			Low	1.39896	0							2
	VVHAK	1	1	1	P04040	K5(ONE)	707.443			Low	0.400929	0							0
	KRLCENIAGHLK	2	1	1	P04040	K1(HNE); C4(Carbamidomethyl)	1594.91						Low	2.07528	0	Low	1.85321	0	2
	GIPDGHR	2	1	1	P04040		751.385						Low	0.722789	0	Low	0.756676	0	0
Q16610	Extracellular matrix protein 1 OS=Homo sapiens GN=ECM1 PE=1 SV=2 - [ECM1_HUMAN]	42.41	1	9	17	32	25.9684	27.78	10	12	22.8861	20.74	8	10	25.4283	23.89	10	10	540	60.6353	6.7124
	Sequence	# PSMs	# Proteins	# Protein Groups	Protein Group Accessions	Modifications	MH+ [Da]	q-Value	PEP	A2	XCorr A2	Probability A2	B2	XCorr B2	Probability B2	C2	XCorr C2	Probability C2	# Missed Cleavages
	NIWRDPALCCYLSPGDEQVNCFNINYLR	2	1	1	Q16610	C9(Carbamidomethyl); C10(Carbamidomethyl); C21(Carbamidomethyl)	3487.6	0	0.00418098	High	5.45641	0				High	5.26537	0	1
	QGETLNFLEIGYSR	3	1	1	Q16610		1626.81	0	0.00746793	High	3.69758	0	High	3.77811	0	High	3.57149	0	0
	LTFINDLCGPR	5	1	1	Q16610	C8(Carbamidomethyl)	1305.66	0	0.0465671	High	3.36568	0	High	2.97903	0	High	2.68509	0	0
	NVALVSGDTENAK	3	1	1	Q16610		1317.66	0	1.49746e-06	High	3.17471	0	High	3.18076	0	High	3.03147	0	0
	LVWEEAMSR	5	1	1	Q16610		1120.55	0	5.73089e-05	High	3.0428	0	High	2.85853	0	High	2.8553	0	0
	QHVVYGPWNLPQSSYSHLTR	3	1	1	Q16610		2369.18	0	0.013637	High	2.65968	0	High	2.30696	0	High	2.23781	0	0
	DPALCCYLSPGDEQVNCFNINYLR	1	1	1	Q16610	C5(Carbamidomethyl); C6(Carbamidomethyl); C17(Carbamidomethyl)	2918.29	0	3.95411e-05							High	3.89196	0	0
	FCEAEFSVK	1	1	1	Q16610	C2(Carbamidomethyl)	1116.5	0	0.00107621							High	1.88978	0	0
	LDGFPPGRPSPDNLNQICLPNR	1	1	1	Q16610	C18(Carbamidomethyl)	2477.24	0.003753	0.0415249				High	2.79805	0				0
	EFQRCCR	1	1	1	Q16610	R4(MG-H1); C5(Carbamidomethyl); C6(Carbamidomethyl); R7(MG-H1)	1163.46	0.786451	1							Low	0.790095	0	1
	MGTTARAALVLTYLAVASAASEGGFTATGQR	1	1	1	Q16610	M1(Oxidation); R6(MG-H1)	3112.55			Low	1.88168	0							1
	LTFINDLCGPRRNIWR	1	1	1	Q16610	C8(Carbamidomethyl); R11(MG-H1); R12(MG-H1)	2139.09			Low	1.55431	0							2
	HKHIPGLIHNMTAR	1	1	1	Q16610	K2(Glycation); M11(Oxidation); R14(MG-H1)	1856.94			Low	1.26813	0							1
	TRPHWCCTR	1	1	1	Q16610	H4(ONE); C6(Carbamidomethyl); C7(Carbamidomethyl)	1427.66			Low	0.88313	0							0
	RAPYPNYDRDILTIDIGR	1	1	1	Q16610		2148.12						Low	1.97239	0				2
	CCHCR	1	1	1	Q16610	C1(Carbamidomethyl); C2(Carbamidomethyl); H3(ONE); C4(Carbamidomethyl)	946.373						Low	0.402734	0				0
	QGNNHTCTWKAWEDTLDK	1	1	1	Q16610	C7(Carbamidomethyl); K10(Glycation)	2366.03									Low	1.11705	0	1
P07384	Calpain-1 catalytic subunit OS=Homo sapiens GN=CAPN1 PE=1 SV=1 - [CAN1_HUMAN]	40.9	1	19	26	60	42.0182	28.85	17	21	35.9055	33.47	20	23	40.5918	21.01	14	16	714	81.8382	5.66846
	Sequence	# PSMs	# Proteins	# Protein Groups	Protein Group Accessions	Modifications	MH+ [Da]	q-Value	PEP	A2	XCorr A2	Probability A2	B2	XCorr B2	Probability B2	C2	XCorr C2	Probability C2	# Missed Cleavages
	RPTELLSNPQFIVDGATR	4	1	1	P07384		2014.07	0	0.00438971	High	4.66971	0	High	4.15025	0	High	4.53366	0	0
	YSEPDLAVDFDNFVCCLVR	4	1	1	P07384	C15(Carbamidomethyl); C16(Carbamidomethyl)	2319.04	0	1.5304e-08	High	4.08521	0	High	3.90953	0	High	3.83244	0	0
	DMETIGFAVYEVPPELVGQPAVHLK	1	1	1	P07384		2739.41	0	0.00697329	High	4.04394	0							0
	KAPSDLYQIILK	4	1	1	P07384		1388.82	0	2.3949e-05	High	3.69935	0	High	3.42444	0	High	3.74663	0	1
	LGLVEFNILWNR	3	1	1	P07384		1473.82	0	0.00119853	High	3.50308	0	High	3.39426	0	High	3.80203	0	0
	TLDTDLDGVVTFDLFK	3	1	1	P07384		1798.91	0	1.06483e-06	High	2.51078	0	High	4.39395	0	High	2.85347	0	0
	APSDLYQIILK	3	1	1	P07384		1260.72	0	0.000579467	High	2.2956	0	High	2.58172	0	High	2.41112	0	0
	YLGQDYEQLR	3	1	1	P07384		1284.62	0	0.000194573	High	2.13444	0	High	1.83516	0	High	2.25883	0	0
	NYPATFWVNPQFK	2	1	1	P07384		1611.8	0	0.0466125	High	1.74935	0	High	2.17945	0				0
	LVFVHSAEGNEFWSALLEK	3	1	1	P07384		2176.11	0	2.76465e-08	Medium	1.5107	0	High	3.25361	0	High	3.71924	0	0
	KLYELIITR	1	1	1	P07384		1148.7	0	9.74441e-05							High	3.07283	0	1
	SEQFINLR	4	1	1	P07384		1006.53	0.000475	0.00276476	High	2.79018	0	High	2.72261	0	High	2.45232	0	0
	DFFLANASR	3	1	1	P07384		1040.52	0.000475	0.00258974	High	1.28185	0	High	1.47927	0	High	1.97897	0	0
	GFSLESCR	3	1	1	P07384	C7(Carbamidomethyl)	955.43	0.000908	0.00955364	High	2.15441	0	High	1.78812	0	High	1.90696	0	0
	LETMFR	1	1	1	P07384	M4(Oxidation)	812.398	0.000908	0.0023357				High	1.22722	0				0
	CLQSGTLFR	1	1	1	P07384	C1(Carbamidomethyl)	1081.55	0.000972	0.0900542	High	1.58241	0							0
	SGSMSAYEMR	1	1	1	P07384	M4(Oxidation); M9(Oxidation)	1150.45	0.003252	0.153262	High	1.75276	0							0
	NYLSIFR	2	1	1	P07384		912.494	0.003554	0.170816	High	1.43199	0	Low	1.011	0				0
	LPPGEYVVVPSTFEPNKEGDFVLR	1	1	1	P07384		2689.39	0.007732	0.0990713				High	2.27242	0				1
	TILNR	2	1	1	P07384		616.378	0.241515	1				Low	0.695703	0				0
	LGLVEFNILWNRIR	2	1	1	P07384	R12(MG-H1)	1797.01	0.541201	1							Low	1.29098	0	1
	MEDGEFWMSFR	3	1	1	P07384	M1(Oxidation); M8(Oxidation)	1466.58	0.750065	1	Low	0.573004	0	Low	0.799349	0				0
	MEDGEFWMSFR	1	1	1	P07384		1434.6	0.790313	1	Low	0.830993	0							0
	FDLDKSGSMSAYEMRMAIESAGFKLNK	2	1	1	P07384	K5(ONE); K24(Glycation); K27(HNE)	3498.72						Low	2.05374	0				3
	TKGFSLESCRSMVNLMDRDGNGK	1	1	1	P07384	K2(HNE); C9(Carbamidomethyl); M16(Oxidation); R18(MG-H1)	2828.33						Low	1.75566	0				3
	SGSMSAYEMRMAIESAGFK	1	1	1	P07384	Y7(Nitro); K19(ONE)	2252.02						Low	1.01771	0				1
	DFMREFTR	1	1	1	P07384		1101.51									Low	0.718859	0	1
O14818	Proteasome subunit alpha type-7 OS=Homo sapiens GN=PSMA7 PE=1 SV=1 - [PSA7_HUMAN]	38.71	4	4	10	16	6.04986	27.42	6	7					6.52015	35.08	8	9	248	27.8696	8.45557
	Sequence	# PSMs	# Proteins	# Protein Groups	Protein Group Accessions	Modifications	MH+ [Da]	q-Value	PEP	A2	XCorr A2	Probability A2	B2	XCorr B2	Probability B2	C2	XCorr C2	Probability C2	# Missed Cleavages
	ALLEVVQSGGK	2	2	1	O14818		1100.63	0	0.0146891	High	3.23828	0				High	1.72478	0	0
	NYTDEAIETDDLTIK	2	1	1	O14818		1740.82	0	0.00441287	High	2.81158	0				High	2.36937	0	0
	AITVFSPDGHLFQVEYAQEAVK	1	2	1	O14818		2449.24	0.000475	0.00510055							High	2.426	0	0
	AITVFSPDGHLFQVEYAQEAVKK	1	2	1	O14818		2577.34	0.01063	0.237224	Medium	1.85342	0							1
	IVINR	4	4	2	O14818;P04040		614.399	0.011288	0.124963	Low	1.07996	0				Medium	1.31527	0	0
	YIASLK	2	1	1	O14818		694.413	0.059834	0.466229	Low	1.24148	0				Low	1.07108	0	0
	EKEENEKK	1	1	1	O14818	K2(Glycation); K8(Glycation)	1357.62			Low	1.4447	0							2
	EFLEKNYTDEAIETDDLTIK	1	1	1	O14818	K5(HNE)	2543.24									Low	1.86859	0	1
	LYQTDPSGTYHAWK	1	2	1	O14818		1666.79									Low	1.43163	0	0
	NIELAVMRR	1	1	1	O14818		1101.63									Low	1.40173	0	1
Q96E17	Ras-related protein Rab-3C OS=Homo sapiens GN=RAB3C PE=2 SV=1 - [RAB3C_HUMAN]	38.33	24	1	8	27	1.62545	14.1	2	6	3.82163	18.94	5	9	1.71637	33.48	7	12	227	25.9356	5.23682
	Sequence	# PSMs	# Proteins	# Protein Groups	Protein Group Accessions	Modifications	MH+ [Da]	q-Value	PEP	A2	XCorr A2	Probability A2	B2	XCorr B2	Probability B2	C2	XCorr C2	Probability C2	# Missed Cleavages
	LQIWDTAGQER	1	24	1	Q96E17		1316.66	0.002518	0.0254234				High	1.88159	0				0
	YGQKDSSDQNFDYMFK	4	1	1	Q96E17	M14(Oxidation); K16(HNE)	2144.93	0.528501	0.998262	Low	1.62545	0	Low	1.5608	0	Low	1.71637	0	1
	YGQKDSSDQNFDYMFK	3	1	1	Q96E17	K16(HNE)	2128.93	0.533684	1	Low	1.2713	0	Low	1.37768	0	Low	1.53742	0	1
	MRHEAPMQMASAQDARYGQK	9	1	1	Q96E17	M9(Oxidation); R16(MG-H1); K20(Glycation)	2538.1			Low	1.43791	0	Low	1.67202	0	Low	1.34283	0	2
	MRHEAPMQMASAQDARYGQK	2	1	1	Q96E17	R16(MG-H1); K20(Glycation)	2522.1			Low	1.41945	0				Low	1.30571	0	2
	HEAPMQMASAQDARYGQK	2	1	1	Q96E17	H1(ONE); R14(MG-H1); K18(HNE)	2383.16						Low	1.94004	0	Low	1.57336	0	1
	MRHEAPMQMASAQDAR	2	1	1	Q96E17	M1(Oxidation); H3(ONE); M7(Oxidation); M9(Oxidation)	2031.92						Low	0.999032	0	Low	0.890818	0	1
	LVDIICDKMSESLETDPAITAAKQNTRLK	1	1	1	Q96E17	C6(Carbamidomethyl); K29(ONE)	3414.77									Low	1.89504	0	3
	YGQKDSSDQNFDYMFK	1	1	1	Q96E17	Y1(Nitro); K4(HNE); K16(ONE)	2328.02									Low	1.15717	0	1
	LVDIICDK	1	1	1	Q96E17	C6(Carbamidomethyl); K8(Glycation)	1137.57									Low	1.1243	0	0
	TYSWDNAQVILVGNK	1	1	1	Q96E17	Y2(Nitro)	1752.85									Low	1.05137	0	0
P25311	Zinc-alpha-2-glycoprotein OS=Homo sapiens GN=AZGP1 PE=1 SV=2 - [ZA2G_HUMAN]	38.26	1	8	11	37	16.3069	38.26	10	11	24.2706	34.23	10	13	23.3289	34.23	9	13	298	34.2371	6.04932
	Sequence	# PSMs	# Proteins	# Protein Groups	Protein Group Accessions	Modifications	MH+ [Da]	q-Value	PEP	A2	XCorr A2	Probability A2	B2	XCorr B2	Probability B2	C2	XCorr C2	Probability C2	# Missed Cleavages
	AYLEEECPATLR	3	1	1	P25311	C7(Carbamidomethyl)	1451.68	0	0.0107851	High	3.71667	0	High	3.73005	0	High	3.78738	0	0
	HVEDVPAFQALGSLNDLQFFR	6	1	1	P25311		2403.21	0	3.36095e-12	High	3.14105	0	High	5.02516	0	High	5.29815	0	0
	EIPAWVPFDPAAQITK	5	1	1	P25311		1782.94	0	5.3013e-06	High	2.21902	0	High	2.42736	0	High	3.44897	0	0
	AGEVQEPELR	3	1	1	P25311		1127.57	0	0.0375646	High	1.8588	0	High	1.64112	0	High	1.53766	0	0
	YYYDGKDYIEFNK	3	1	1	P25311		1717.78	0.000908	0.00364322	High	1.89885	0	High	1.59477	0	High	2.01069	0	1
	CLAYDFYPGK	3	1	1	P25311	C1(Carbamidomethyl)	1233.56	0.000908	0.00187047	High	1.71372	0	High	1.93825	0	High	1.25097	0	0
	IDVHWTR	5	1	1	P25311		926.485	0.002127	0.0220613	Medium	2.02659	0	Low	1.9192	0	High	1.96734	0	0
	QDSQLQK	3	1	1	P25311		846.432	0.023597	0.309736	Low	1.21232	0	Low	1.82774	0	Medium	1.59646	0	0
	YYYDGK	1	1	1	P25311		808.351	0.085617	0.824295				Low	1.27867	0				0
	QKWEAEPVYVQR	1	1	1	P25311	K2(HNE)	1688.91	0.371069	0.888962	Low	1.04103	0							1
	YLKYSK	3	1	1	P25311	Y4(Nitro)	846.431	0.663002	1	Low	1.29805	0	Low	1.22517	0	Low	1.48428	0	1
	CLAYDFYPGK	1	1	1	P25311	C1(Carbamidomethyl); K10(Glycation)	1395.61									Low	0.535465	0	0
Q9NSB4	Keratin, type II cuticular Hb2 OS=Homo sapiens GN=KRT82 PE=3 SV=3 - [KRT82_HUMAN]	38.01	8	3	22	73	23.0488	30.02	14	22	30.9646	27.49	14	24	24.281	30.02	16	27	513	56.6163	6.7417
	Sequence	# PSMs	# Proteins	# Protein Groups	Protein Group Accessions	Modifications	MH+ [Da]	q-Value	PEP	A2	XCorr A2	Probability A2	B2	XCorr B2	Probability B2	C2	XCorr C2	Probability C2	# Missed Cleavages
	LGLDIEIATYR	21	6	3	Q9NSB4;P78386;O43790		1263.69	0	0.00590555	High	3.01048	0	High	3.20033	0	Low	2.08927	0	0
	ELDVDGIIAEIK	5	1	1	Q9NSB4		1314.71	0	0.0242394	High	2.92483	0	High	2.67721	0	High	2.62839	0	0
	LLEGEEHR	3	2	2	Q9NSB4;P78386		982.496	0.000475	0.00284113	High	2.29164	0	High	2.34375	0	High	2.65045	0	0
	AKQDMACLLK	3	2	2	Q9NSB4;P78386	C7(Carbamidomethyl)	1177.6	0.001821	0.110043	High	2.31532	0	High	2.12257	0	High	2.29571	0	1
	LQQETENVK	3	1	1	Q9NSB4		1088.56	0.002518	0.0366929	High	2.1578	0	High	2.04405	0	Medium	1.41582	0	0
	LLETK	3	14	3	Q9NSB4;P78386;O43790		603.372	0.03219	0.418343	Medium	1.5286	0	Medium	1.2792	0	Medium	1.48406	0	0
	QDMACLLK	1	2	2	Q9NSB4;P78386	C5(Carbamidomethyl)	978.475	0.042927	0.458905				Medium	1.37202	0				0
	FASFINK	2	1	1	Q9NSB4		826.445	0.047132	0.427699	Medium	1.39125	0				Low	1.43325	0	0
	AKQDMACLLK	1	2	2	Q9NSB4;P78386	M5(Oxidation); C7(Carbamidomethyl)	1193.6	0.172283	1				Low	0.992323	0				1
	LEGAIAEAEQQGEAALNDAKCK	2	1	1	Q9NSB4	K20(HNE); C21(Carbamidomethyl); K22(ONE)	2626.31	0.430328	1				Low	2.18692	0				1
	GPCRPGGGRGLR	1	1	1	Q9NSB4	C3(Carbamidomethyl)	1239.64	0.722385	1	Low	0.960654	0							1
	MVTHYAVSKGPCRPGGGRGLRALGCLGSR	8	1	1	Q9NSB4	M1(Oxidation); H4(HNE); C12(Carbamidomethyl); R13(MG-H1); C25(Carbamidomethyl); R29(MG-H1)	3350.71	0.7521	1	Low	2.60926	0	Low	2.23344	0	Low	2.47954	0	3
	CKLEGAIAEAEQQGEAALNDAK	2	1	1	Q9NSB4	C1(Carbamidomethyl); K2(ONE); K22(HNE)	2626.31			Low	2.05352	0	Low	1.65146	0				1
	LAGLEEALQK	3	1	1	Q9NSB4		1071.6			Low	1.91923	0	Low	2.08512	0	Low	1.98274	0	0
	CLNNRFASFINKVR	1	1	1	Q9NSB4	C1(Carbamidomethyl); K12(Glycation); R14(MG-H1)	1954.99			Low	1.70178	0							2
	CGSQSFSSYSAVMPRMVTHYAVSK	1	1	1	Q9NSB4	C1(Carbamidomethyl); M13(Oxidation); R15(MG-H1); H19(ONE); Y20(Nitro)	2949.34			Low	1.58105	0							1
	QLDCVSGDR	3	1	1	Q9NSB4	C4(Carbamidomethyl); R9(MG-H1)	1103.47			Low	1.1065	0				Low	0.597428	0	0
	SKAEAEAWYQCR	2	1	1	Q9NSB4	K2(ONE); C11(Carbamidomethyl)	1652.76						Low	0.990843	0	Low	0.967453	0	1
	MVTHYAVSK	2	1	1	Q9NSB4	M1(Oxidation); Y5(Nitro); K9(HNE)	1252.63						Low	0.980927	0	Low	0.919454	0	0
	MSYHSFQPGSR	2	1	1	Q9NSB4	M1(Oxidation); Y3(Nitro)	1357.55						Low	0.712802	0	Low	0.443003	0	0
	LGLDIEIATYRR	2	6	3	Q9NSB4;P78386;O43790	R11(MG-H1)	1473.82									Low	1.65182	0	1
	EQIKCLNNR	1	1	1	Q9NSB4	K4(Glycation); C5(Carbamidomethyl)	1336.66									Low	1.01429	0	1
	CGGTLPGFGYR	1	1	1	Q9NSB4	C1(Carbamidomethyl)	1184.56									Low	0.581033	0	0
P15924	Desmoplakin OS=Homo sapiens GN=DSP PE=1 SV=3 - [DESP_HUMAN]	37.55	3	49	108	275	112.882	27.13	73	89	121.427	28.11	77	97	110.198	27.73	72	89	2871	331.569	6.81494
	Sequence	# PSMs	# Proteins	# Protein Groups	Protein Group Accessions	Modifications	MH+ [Da]	q-Value	PEP	A2	XCorr A2	Probability A2	B2	XCorr B2	Probability B2	C2	XCorr C2	Probability C2	# Missed Cleavages
	AVTGYNDPETGNIISLFQAMNK	3	1	1	P15924		2383.16	0	1.22336e-09	High	4.93267	0	High	5.21364	0	High	4.50372	0	0
	IGLVRPGTALELLEAQAATGFIVDPVSNLR	7	1	1	P15924		3120.74	0	0.00372895	High	4.90229	0	High	5.13323	0	High	4.46732	0	0
	GFFDPNTEENLTYLQLK	5	1	1	P15924		2028.99	0	2.1453e-08	High	4.8621	0	High	5.76515	0	High	5.41083	0	0
	LLEAQIATGGIIDPK	4	1	1	P15924		1538.88	0	5.98594e-11	High	4.85293	0	High	5.11325	0	High	4.77766	0	0
	GYFNEELSEILSDPSDDTK	3	1	1	P15924		2158.97	0	7.83069e-06	High	4.72746	0	High	4.32885	0	High	4.47292	0	0
	SAIYQLEEEYENLLK	5	1	1	P15924		1841.92	0	1.08485e-07	High	4.41296	0	High	4.4002	0	High	4.60129	0	0
	SVQNDSQAIAEVLNQLK	3	1	1	P15924		1856.97	0	1.49014e-08	High	4.36813	0				High	4.35841	0	0
	ALLQAILQTEDMLK	4	1	1	P15924	M12(Oxidation)	1602.88	0	0.000138766	High	3.9632	0	High	4.62839	0	High	3.17387	0	0
	TMIQSPSGVILQEAADVHAR	3	1	1	P15924	M2(Oxidation)	2139.09	0	0.00223425	High	3.71953	0	High	3.6227	0	High	2.21432	0	0
	TLELQGLINDLQR	3	1	1	P15924		1512.84	0	0.0381417	High	3.63138	0	High	3.29692	0	High	3.39748	0	0
	LTEEETVCLDLDKVEAYR	3	1	1	P15924	C8(Carbamidomethyl)	2183.05	0	7.24465e-10	High	3.41224	0	High	3.19695	0	High	3.22601	0	1
	IKDFLQGSSCIAGIYNETTK	4	1	1	P15924	C10(Carbamidomethyl)	2245.12	0	0.0198251	High	3.22973	0	High	2.19569	0	High	3.58114	0	1
	ALLQAILQTEDMLK	3	1	1	P15924		1586.88	0	0.0132459	High	3.13281	0	High	2.7497	0	High	2.76493	0	0
	LPVEEAYKR	5	1	1	P15924		1104.6	0	0.047492	High	2.69966	0	High	2.84113	0	High	2.40359	0	1
	YEVTSGGGGTSR	3	1	1	P15924		1170.54	0	0.041107	High	2.04532	0	High	1.22128	0	High	1.70915	0	0
	NLHSEISGK	3	1	1	P15924		984.512	0	0.0378019	High	1.7515	0	High	1.87896	0	High	1.83959	0	0
	LLQLQEQMR	3	1	1	P15924		1158.63	0	0.00092386	High	1.4869	0	High	1.34993	0	High	1.76445	0	0
	YIELLTR	6	1	1	P15924		907.524	0	0.000446682	High	1.47575	0	High	1.68873	0	High	1.52882	0	0
	ITNLTQQLEQASIVK	1	1	1	P15924		1685.94	0	1.08698e-06				High	5.53586	0				0
	YCYLQNEVFGLFQK	2	1	1	P15924	C2(Carbamidomethyl)	1808.87	0	1.71373e-10				High	3.3949	0	High	4.41088	0	0
	AVTGYNDPETGNIISLFQAMNK	2	1	1	P15924	M20(Oxidation)	2399.15	0	5.56328e-05				High	2.27706	0	High	3.33182	0	0
	LASLEELKR	6	1	1	P15924		1058.62	0.000475	0.00676504	High	2.53488	0	High	2.60532	0	High	2.81902	0	1
	LPVDIAYK	3	1	1	P15924		918.529	0.000475	0.00330588	High	2.22644	0	High	1.92246	0	High	1.79969	0	0
	FLDQNLQK	3	1	1	P15924		1005.54	0.000475	0.00297517	High	2.02763	0	High	2.10772	0	High	2.23794	0	0
	LPVEEAYK	4	1	1	P15924		948.503	0.000475	0.00254273	High	1.92178	0	High	1.45974	0	High	1.83844	0	0
	ETQSQLETER	3	1	1	P15924		1220.58	0.000475	0.00323498	High	1.54366	0	High	1.69304	0	High	1.57663	0	0
	LGIYEAMK	3	1	1	P15924		924.485	0.000475	0.0045193	High	1.3895	0	High	1.46367	0	High	0.823764	0	0
	AQQIHSQTSQQYPLYDLDLGK	2	1	1	P15924		2433.21	0.000475	0.00558119				Medium	2.5018	0	High	2.41203	0	0
	NQFETEINITK	1	1	1	P15924		1336.67	0.000567	0.0512459	High	3.06593	0							0
	FGDSNTVMR	2	1	1	P15924	M8(Oxidation)	1042.46	0.000567	0.0569583	High	2.25035	0	High	1.7307	0				0
	TMIQSPSGVILQEAADVHAR	1	1	1	P15924		2123.09	0.000581	0.00134026				High	2.43615	0				0
	TIADLELHYQEFIR	2	1	1	P15924		1747.9	0.000581	0.00134026				High	2.07345	0	Low	1.05725	0	0
	LGIYEAMK	2	1	1	P15924	M7(Oxidation)	940.481	0.000908	0.00191149	High	2.11256	0	High	1.48244	0				0
	LLQLQEQMR	2	1	1	P15924	M8(Oxidation)	1174.63	0.000908	0.00565858	High	1.48689	0	High	1.34803	0				0
	AELIVQPELK	3	1	1	P15924		1139.67	0.000908	0.00475049	Medium	1.37714	0	High	1.9835	0	Low	0.902865	0	0
	NKYETEINITK	1	1	1	P15924		1352.7	0.000972	0.090917	High	2.70036	0							1
	LTYEIEDEKR	2	1	1	P15924		1295.65	0.000972	0.0830703	High	2.41525	0	High	2.16273	0				1
	STLEAETR	1	1	1	P15924		906.453	0.001803	0.0150457				High	1.56678	0				0
	GLVGIEFK	3	1	1	P15924		862.503	0.002127	0.033423	High	2.03773	0	High	2.11344	0	High	1.89779	0	0
	VTQLTDR	5	1	1	P15924		832.452	0.002127	0.0233796	High	1.8963	0	High	1.94314	0	High	2.17313	0	0
	QLQNIIQATSR	1	1	1	P15924		1271.71	0.002127	0.0265431							High	1.70043	0	0
	HVTSECLGWMR	3	1	1	P15924	C6(Carbamidomethyl)	1375.62	0.002518	0.0296254	High	1.69316	0	High	1.21437	0	Low	1.70672	0	0
	IEVLEEELR	4	1	1	P15924		1129.61	0.003923	0.187757	High	2.03611	0	Low	1.28207	0	Medium	1.34668	0	0
	NQCTQVVQER	3	1	1	P15924	C3(Carbamidomethyl)	1261.6	0.004919	0.052616	High	2.69749	0	High	2.45108	0	High	2.86665	0	0
	FLSEMLK	3	1	1	P15924		867.465	0.006863	0.20797	High	1.72128	0	Low	1.60297	0	Medium	1.55965	0	0
	AESGPDLR	3	1	1	P15924		844.416	0.009093	0.127725	Medium	1.72047	0	High	1.92354	0	Low	1.76401	0	0
	YKQSLDDAAK	1	1	1	P15924		1138.57	0.009447	0.140073				High	1.87766	0				1
	LQSLTENLTK	3	1	1	P15924		1146.64	0.012352	0.251767	Medium	1.52512	0	Low	1.54626	0	Low	0.954121	0	0
	IVHKGDECILK	1	1	1	P15924	C8(Carbamidomethyl)	1311.71	0.013683	0.261331	Medium	2.5407	0							1
	GLQDSIR	3	1	1	P15924		788.426	0.014299	0.166295	Low	0.733963	0	Low	1.25482	0	Medium	1.29398	0	0
	SLEDLK	5	2	1	P15924		704.382	0.029979	0.368931	Medium	1.44102	0	Low	1.15697	0	Low	1.40876	0	0
	QEAFSIR	3	1	1	P15924		850.442	0.029979	0.366954	Medium	1.24087	0	Low	1.45212	0	Medium	1.57398	0	0
	VLEQDK	3	1	1	P15924		731.393	0.036895	0.46839				Low	1.15321	0	Low	1.39479	0	0
	LLSAER	3	3	2	P15924;Q15149		688.399	0.037569	0.437345	Medium	0.906763	0	Medium	1.35982	0	Low	0.869162	0	0
	FQNSLK	3	1	1	P15924		736.398	0.046898	0.427307	Medium	1.49353	0	Low	1.16465	0	Low	1.13852	0	0
	VYEAR	2	1	1	P15924		637.331	0.062458	0.620807				Low	0.921715	0	Low	1.31822	0	0
	VQYDLQKANSSATETINKLK	1	1	1	P15924		2251.19	0.103969	0.569974	Low	1.68064	0							2
	INELK	1	1	1	P15924		616.367	0.110614	0.710877							Low	1.54301	0	0
	ELIEK	1	4	4	P15924;Q7Z6B0;P20930;Q5D862		631.367	0.128759	0.608104	Low	1.02307	0							0
	AQIDNLTR	2	1	1	P15924		930.5	0.128935	0.729957	Low	1.40644	0				Low	1.66075	0	0
	VIETNR	1	1	1	P15924		731.403	0.135231	1				Low	0.816646	0				0
	EIDKLR	3	1	1	P15924		773.451	0.155191	0.646351	Low	1.45376	0	Low	1.87887	0	Low	0.788206	0	1
	SLLATMK	2	1	1	P15924		763.438	0.160078	1	Low	0.640892	0	Low	0.955169	0				0
	SEDNARHKQSLEEAAKTIQDK	2	1	1	P15924	R6(MG-H1); K16(HNE); K21(ONE)	2762.41	0.334846	1	Low	1.77584	0				Low	2.05064	0	3
	KMSAAEAVK	1	1	1	P15924	K9(ONE)	1088.61	0.644273	1	Low	1.04395	0							1
	QVMQQRSEDNAR	1	1	1	P15924	R12(MG-H1)	1515.7	0.6846	1				Low	1.31121	0				1
	RWEYENELSKVR	1	1	1	P15924	Y4(Nitro); K10(HNE); R12(MG-H1)	1863.94	0.789937	1				Low	1.47305	0				2
	WQLDKIKADLREK	1	1	1	P15924	K7(ONE)	1797.01	0.791281	1				Low	1.35252	0				3
	TMRQEDYMK	2	1	1	P15924	M2(Oxidation); M8(Oxidation)	1233.52	0.793159	1	Low	0.878741	0				Low	0.438109	0	1
	GGGGYTCQSGSGWDEFTKHVTSECLGWMRQQR	1	1	1	P15924	C7(Carbamidomethyl); K18(Glycation); H19(ONE); C24(Carbamidomethyl); R32(MG-H1)	4032.73	0.797943	1							Low	1.77758	0	2
	YKQSLDDAAKTIQDK	2	1	1	P15924	Y1(Nitro); K2(Glycation); K10(HNE); K15(ONE)	2241.15			Low	2.27488	0				Low	2.33779	0	2
	EEAIRKIESEREK	5	1	1	P15924	K6(Glycation); R11(MG-H1); K13(Glycation)	1994.96			Low	2.0675	0	Low	2.12311	0				3
	ELDECFAQANDQMEILDSLIREMRQMGQPCDAYQKR	1	1	1	P15924	C5(Carbamidomethyl); R21(MG-H1); C30(Carbamidomethyl); K35(ONE)	4597.14			Low	1.59889	0							3
	LKISYKDAINR	2	1	1	P15924	Y5(Nitro)	1365.74			Low	1.43468	0	Low	1.13622	0				2
	VLEQDKARLQR	3	1	1	P15924	K6(ONE)	1509.86			Low	1.43054	0	Low	1.42947	0	Low	1.27544	0	2
	AEFQEEAKR	8	1	1	P15924		1107.54			Low	1.41319	0	Low	1.5424	0	Low	1.56942	0	1
	LWDLEK	3	1	1	P15924		803.43			Low	1.40473	0	Low	1.18552	0	Low	1.17067	0	0
	NTLRKR	3	1	1	P15924	R4(MG-H1); K5(Glycation)	1003.55			Low	1.2841	0	Low	1.14034	0	Low	1.09944	0	2
	RASSKGGGGYTCQSGSGWDEFTK	2	1	1	P15924	R1(MG-H1); K5(Glycation); C12(Carbamidomethyl); K23(ONE)	2793.22			Low	1.27713	0				Low	1.20308	0	2
	ENRDLK	3	1	1	P15924		774.411			Low	1.27093	0	Low	1.48342	0				1
	LKAEFQEEAK	3	1	1	P15924	K2(Glycation)	1354.68			Low	1.18167	0	Low	1.23209	0	Low	1.26836	0	1
	RGRSEADSDK	1	1	1	P15924	R3(MG-H1); K10(HNE)	1330.65			Low	1.16201	0							2
	RTASEDSCKRK	3	1	1	P15924	C8(Carbamidomethyl); R10(MG-H1)	1391.68			Low	1.10347	0	Low	1.35116	0	Low	1.26678	0	3
	LTYEIEDEKR	1	1	1	P15924	Y3(Nitro); K9(HNE); R10(MG-H1)	1550.75			Low	1.0597	0							1
	EYEIERLR	3	1	1	P15924	Y2(Nitro); R6(MG-H1)	1206.57			Low	1.045	0	Low	1.09772	0	Low	1.07294	0	1
	LKTMRQEDYMK	1	1	1	P15924	K2(ONE); M10(Oxidation); K11(ONE)	1766.9			Low	1.04246	0							2
	RIEERCRR	3	1	1	P15924	C6(Carbamidomethyl); R7(MG-H1); R8(MG-H1)	1282.64			Low	0.885943	0	Low	0.909272	0				3
	QVTQMR	1	1	1	P15924	R6(MG-H1)	816.41			Low	0.842896	0							0
	LQAEIKR	3	1	1	P15924	K6(ONE)	1011.62			Low	0.778481	0	Low	1.12049	0	Low	0.859806	0	1
	QMGQPCDAYQK	2	1	1	P15924	C6(Carbamidomethyl)	1325.57			Low	0.747037	0				Low	0.815186	0	0
	KYPCDK	1	1	1	P15924	K1(ONE); Y2(Nitro); C4(Carbamidomethyl)	1009.46			Low	0.744815	0							1
	KFFDQYR	1	1	1	P15924	Y6(Nitro); R7(MG-H1)	1102.48			Low	0.633205	0							1
	TMRQEDYMK	1	1	1	P15924	M2(Oxidation); R3(MG-H1); Y7(Nitro)	1316.53			Low	0.631381	0							1
	VQEQELTRLR	1	1	1	P15924		1271.71			Low	0.601703	0							1
	EMSVQEAYK	1	1	1	P15924	Y8(Nitro); K9(Glycation)	1291.53			Low	0.523984	0							0
	VQYDLQKANSSATETINK	2	1	1	P15924	Y3(Nitro); K18(HNE)	2211.11						Low	2.96786	0	Low	2.95716	0	1
	WLYDAKRRQDSLESMK	1	1	1	P15924	Y3(Nitro); M15(Oxidation); K16(ONE)	2241.12						Low	1.74414	0				3
	VRNHYNEEMSNLRNK	1	1	1	P15924	R2(MG-H1); K15(ONE)	2112.04						Low	1.41722	0				2
	KIESEREK	1	1	1	P15924	K1(ONE); R6(MG-H1); K8(Glycation)	1388.72						Low	1.24372	0				2
	SRYQREIDKLR	1	1	1	P15924	Y3(Nitro); R5(MG-H1); R11(MG-H1)	1616.82						Low	1.15028	0				3
	AAQRLQDTSSYAK	1	1	1	P15924		1438.73						Low	1.12807	0				1
	SGSRSGSRSGSRR	3	1	1	P15924	R4(MG-H1)	1390.68						Low	1.11288	0	Low	1.02151	0	3
	EISMQKEDDSKNLR	1	1	1	P15924	M4(Oxidation); K6(Glycation); K11(Glycation)	2032.91						Low	1.11188	0				2
	RGRSEADSDK	2	1	1	P15924	K10(ONE)	1274.63						Low	1.05794	0	Low	0.934865	0	2
	LPVEEAYKR	3	1	1	P15924	K8(ONE); R9(MG-H1)	1312.72						Low	0.956689	0	Low	1.37541	0	1
	RKIQSQFTDAQK	1	1	1	P15924		1449.77						Low	0.946284	0				2
	AISVPR	1	1	1	P15924		642.393						Low	0.937285	0				0
	KNLIDRETGMR	1	1	1	P15924	K1(Glycation); R6(MG-H1)	1548.77						Low	0.818046	0				2
	LKTMRQEDYMK	1	1	1	P15924	K2(ONE); Y9(Nitro); K11(Glycation)	1803.85						Low	0.654993	0				2
	YQREIDKLR	1	1	1	P15924	Y1(Nitro); R3(MG-H1); K7(Glycation)	1481.74									Low	1.74305	0	2
	YQREIDKLRQRPYGSHR	1	1	1	P15924	R3(MG-H1); R9(MG-H1); Y13(Nitro); H16(HNE)	2511.27									Low	1.69739	0	3
	RQDSLESMKFGDSNTVMRFLNEQK	1	1	1	P15924	M8(Oxidation); M17(Oxidation); K24(Glycation)	3054.4									Low	1.59415	0	3
	KSVEDRFDQQKNDYDQLQK	1	1	1	P15924		2384.14									Low	1.5751	0	3
	VRNHYNEEMSNLRNKYETEINITK	1	1	1	P15924	Y5(Nitro); M9(Oxidation); K24(ONE)	3210.52									Low	1.53865	0	3
	INTLGRMIR	1	1	1	P15924	R6(MG-H1); M7(Oxidation)	1143.64									Low	1.05406	0	1
	QIKQLRNYR	1	1	1	P15924	Y8(Nitro)	1263.69									Low	0.883417	0	2
	ENLGWQK	1	1	1	P15924		874.442									Low	0.774589	0	0
	IDYER	1	1	1	P15924		695.336									Low	0.432799	0	0
Q8NDP4	Zinc finger protein 439 OS=Homo sapiens GN=ZNF439 PE=1 SV=1 - [ZN439_HUMAN]	37.47	1	1	22	38	1.60806	12.22	5	7	0	23.25	12	16	3.3135	17.23	9	15	499	58.3574	9.24658
	Sequence	# PSMs	# Proteins	# Protein Groups	Protein Group Accessions	Modifications	MH+ [Da]	q-Value	PEP	A2	XCorr A2	Probability A2	B2	XCorr B2	Probability B2	C2	XCorr C2	Probability C2	# Missed Cleavages
	YHPSLRTQERDHTGK	1	1	1	Q8NDP4	R10(MG-H1); H12(ONE); K15(Glycation)	2195.07	0.021619	0.325053	Medium	1.99617	0							2
	FHERTQTHK	2	1	1	Q8NDP4	H2(ONE); H8(ONE)	1491.79	0.197334	0.694517	Low	1.40448	0							1
	LNFQK	1	1	1	Q8NDP4		649.367	0.378629	1							Low	1.03553	0	0
	HMVVHSGDGPYK	1	1	1	Q8NDP4	H1(HNE); M2(Oxidation); H5(HNE); Y11(Nitro)	1699.82	0.708312	1				Low	0.973469	0				0
	SHMGEKAYQCKECGK	1	1	1	Q8NDP4	C10(Carbamidomethyl); C13(Carbamidomethyl); K15(Glycation)	1974.83	0.763147	1							Low	0.88855	0	2
	VNEIK	6	3	3	Q8NDP4;P61011;Q6KB66		602.351			Low	1.60806	0	Low	1.51623	0	Low	1.67124	0	0
	QCGKSFSYSATHR	6	1	1	Q8NDP4	C2(Carbamidomethyl); K4(ONE); H12(HNE)	1838.91			Low	1.24038	0				Low	1.38275	0	1
	YHERTHTGEKPYECKQCGK	1	1	1	Q8NDP4	H2(ONE); R4(MG-H1); K10(Glycation); C14(Carbamidomethyl); C17(Carbamidomethyl); K19(ONE)	2932.32			Low	0.854086	0							2
	SAPNLQLHGRTHTGEKPYQCKECGK	2	1	1	Q8NDP4	H8(HNE); H12(ONE); K16(ONE); C20(Carbamidomethyl); C23(Carbamidomethyl); K25(ONE)	3514.83						Low	2.22569	0				2
	MHSGERPYECKTCGK	1	1	1	Q8NDP4	H2(ONE); C10(Carbamidomethyl); K11(HNE); C13(Carbamidomethyl)	2149.99						Low	1.4671	0				1
	AFTRSGSFRYHER	1	1	1	Q8NDP4	Y10(Nitro); H11(HNE)	1814.88						Low	1.41627	0				2
	THTGEKPYQCK	1	1	1	Q8NDP4	H2(ONE); K6(ONE); C10(Carbamidomethyl)	1656.82						Low	1.37221	0				0
	THTGEKPYECKQCGKAFR	1	1	1	Q8NDP4	K6(Glycation); Y8(Nitro); C10(Carbamidomethyl); C13(Carbamidomethyl)	2404.08						Low	1.3399	0				2
	SHMGEKAYQCKECGK	1	1	1	Q8NDP4	K6(ONE); Y8(Nitro); C10(Carbamidomethyl); K11(ONE); C13(Carbamidomethyl); K15(Glycation)	2328.02						Low	1.29584	0				2
	SGSFRYHERTHTGEKPYECK	2	1	1	Q8NDP4	Y6(Nitro); K15(Glycation); C19(Carbamidomethyl)	2676.16						Low	1.29093	0				2
	SHMGEKAYQCK	1	1	1	Q8NDP4	M3(Oxidation); K6(ONE); Y8(Nitro); C10(Carbamidomethyl); K11(ONE)	1707.77						Low	1.1047	0				1
	TQERDHTGK	1	1	1	Q8NDP4	H6(ONE)	1225.62						Low	0.88343	0				1
	IHRR	1	1	1	Q8NDP4	H2(ONE)	735.463						Low	0.846819	0				1
	HMVVHSGDGPYK	1	1	1	Q8NDP4	M2(Oxidation); H5(ONE); Y11(Nitro)	1541.7						Low	0.689066	0				0
	LYECKQCGKALSSLTSFQTHIR	1	1	1	Q8NDP4	C4(Carbamidomethyl); K5(ONE); C7(Carbamidomethyl); K9(Glycation); H20(ONE); R22(MG-H1)	3151.57									Low	1.99627	0	2
	SCHRHERSHMGEKAYQCK	2	1	1	Q8NDP4	C2(Carbamidomethyl); H3(ONE); R4(MG-H1); R7(MG-H1); C17(Carbamidomethyl); K18(HNE)	2719.25									Low	1.7482	0	3
	AYQCKECGKAFMCPRYVR	1	1	1	Q8NDP4	Y2(Nitro); C4(Carbamidomethyl); K5(HNE); C7(Carbamidomethyl); K9(Glycation); M12(Oxidation); C13(Carbamidomethyl)	2703.18									Low	1.51126	0	3
	YHPSLRTQER	1	1	1	Q8NDP4	R10(MG-H1)	1340.66									Low	1.01347	0	1
	AYQCKECGKAFMCPR	1	1	1	Q8NDP4	Y2(Nitro); C4(Carbamidomethyl); C7(Carbamidomethyl); K9(Glycation); M12(Oxidation); C13(Carbamidomethyl)	2128.83									Low	0.877879	0	2
Q6ZVX7	F-box only protein 50 OS=Homo sapiens GN=NCCRP1 PE=1 SV=1 - [FBX50_HUMAN]	37.45	1	6	11	35	20.3048	35.64	9	13	16.0577	33.82	10	12	19.127	32	8	10	275	30.8279	6.62451
	Sequence	# PSMs	# Proteins	# Protein Groups	Protein Group Accessions	Modifications	MH+ [Da]	q-Value	PEP	A2	XCorr A2	Probability A2	B2	XCorr B2	Probability B2	C2	XCorr C2	Probability C2	# Missed Cleavages
	VTDSSVSVQLRE	4	1	1	Q6ZVX7		1319.68	0	0.000182611	High	3.96406	0	High	3.7862	0	High	3.73184	0	1
	TVIAQHHVAPR	7	1	1	Q6ZVX7		1228.69	0	6.08663e-06	High	3.94572	0	High	1.99743	0	High	3.45027	0	0
	VTDSSVSVQLR	5	1	1	Q6ZVX7		1190.64	0	7.39915e-06	High	3.16618	0	High	3.93685	0	High	2.91248	0	0
	SPNPEGINIYEPAPPTGPTQRPLETLGNFR	3	1	1	Q6ZVX7		3262.65	0.000475	0.00405099	High	3.36249	0	High	3.17431	0	High	3.48159	0	0
	LQQNQSWTVK	3	1	1	Q6ZVX7		1231.64	0.000567	0.0556551	High	2.12172	0	High	1.9067	0	High	1.96761	0	0
	WVQVSHVFR	3	1	1	Q6ZVX7		1157.62	0.000908	0.012639	High	1.9776	0	High	1.37282	0	High	1.55642	0	0
	RPLYR	3	1	1	Q6ZVX7		704.42	0.0585	0.606881	Low	1.73368	0	Low	1.53098	0	Low	1.73874	0	0
	FIHFLHK	1	1	1	Q6ZVX7		941.536	0.061331	0.744485				Low	1.61184	0				0
	GWYIR	1	1	1	Q6ZVX7		694.367	0.150729	1				Low	1.26945	0				0
	MEPGGLRRTR	2	1	1	Q6ZVX7	R8(MG-H1)	1226.65	0.786366	1	Low	1.22222	0							2
	FIHFLHKAKNR	3	1	1	Q6ZVX7	K7(Glycation)	1572.86			Low	2.01097	0	Low	1.45941	0	Low	1.84444	0	2
Q5XKE5	Keratin, type II cytoskeletal 79 OS=Homo sapiens GN=KRT79 PE=1 SV=2 - [K2C79_HUMAN]	37.38	2	1	21	132	74.1085	29.91	19	44	86.962	28.97	18	45	71.2099	19.63	16	43	535	57.8002	7.1958
	Sequence	# PSMs	# Proteins	# Protein Groups	Protein Group Accessions	Modifications	MH+ [Da]	q-Value	PEP	A2	XCorr A2	Probability A2	B2	XCorr B2	Probability B2	C2	XCorr C2	Probability C2	# Missed Cleavages
	LLRDYQELMNVK	8	4	2	Q5XKE5;P35908		1521.81	0	0.0410738	High	4.15863	0	High	4.10776	0	High	4.04756	0	1
	NLDLDSIIAEVK	23	7	4	Q5XKE5;P02538;P35908;P13647		1329.73	0	3.27487e-05	High	4.11003	0	High	4.02615	0	High	4.23221	0	0
	LALDVEIATYRK	6	9	4	Q5XKE5;P02538;P35908;P13647		1391.79	0	9.95429e-06	High	3.76735	0	High	3.4551	0	High	3.70407	0	1
	LALDVEIATYR	22	9	4	Q5XKE5;P02538;P35908;P13647		1263.69	0	1.56047e-06	High	3.19496	0	High	3.52527	0	High	2.82344	0	0
	DYQELMNVK	7	4	2	Q5XKE5;P35908		1139.54	0.000908	0.00255448	High	3.02679	0	High	3.03376	0	High	2.21903	0	0
	YEDEINK	3	12	6	Q5XKE5;Q7Z794;P02538;P35908;P13647;P04264		910.415	0.000908	0.00194671	High	2.10795	0	High	1.73702	0	High	2.20207	0	0
	FASFIDK	11	18	6	Q5XKE5;Q86Y46;Q7Z794;P02538;P35908;P13647		827.43	0.000908	0.00554679	High	2.00992	0	High	2.01274	0	High	1.94041	0	0
	FLEQQNK	6	18	6	Q5XKE5;Q8N1N4;P13647;P02538;P78386;O43790		906.468	0.000908	0.00543583	High	1.7396	0	High	1.82447	0	Medium	1.75315	0	0
	NKYEDEINK	6	7	4	Q5XKE5;P02538;P13647;P04264		1152.55	0.000923	0.012373	High	2.12815	0	High	1.75297	0	High	2.5497	0	1
	FASFIDKVR	5	17	6	Q5XKE5;Q86Y46;Q7Z794;P02538;P35908;P13647		1082.6	0.001394	0.105287	High	2.09797	0	High	1.51442	0	High	1.83712	0	1
	GRLDSELR	6	5	3	Q5XKE5;P02538;P13647		945.511	0.002564	0.132477	High	2.60572	0	Low	2.74039	0	High	2.3457	0	1
	DYQELMNVK	2	4	2	Q5XKE5;P35908	M6(Oxidation)	1155.54	0.004116	0.0501313	High	1.11073	0	High	2.15963	0				0
	LLRDYQELMNVK	1	4	2	Q5XKE5;P35908	M9(Oxidation)	1537.8	0.006124	0.203666	High	2.62384	0							1
	GELALK	3	6	3	Q5XKE5;Q8N1N4;P13647		630.382	0.008756	0.117968	Low	0.651752	0	High	1.84857	0	Medium	1.3124	0	0
	NKYEDEINK	3	7	4	Q5XKE5;P02538;P13647;P04264	K9(HNE)	1308.66	0.029535	0.382619	Low	2.04931	0				Medium	2.21763	0	1
	NVQDLVEDFK	3	1	1	Q5XKE5		1206.6	0.034858	0.424739	Low	1.46735	0	Medium	1.42805	0	Low	1.39335	0	0
	LDSELR	3	9	4	Q5XKE5;Q86Y46;P02538;P13647		732.388	0.036895	0.46851	Medium	1.15585	0	Low	1.02993	0	Medium	1.40364	0	0
	KQCQQLQTAIAEAEQRGELALKDAQK	2	1	1	Q5XKE5	K1(ONE); C3(Carbamidomethyl)	3109.65			Low	2.26641	0	Low	2.29039	0				3
	SSGSGGGAHCGPGTGGFGSRSLYNLGGHK	1	1	1	Q5XKE5	H9(HNE); C10(Carbamidomethyl)	2875.35			Low	1.83586	0							1
	KDVDAAYMGR	1	1	1	Q5XKE5	K1(HNE); Y7(Nitro); M8(Oxidation); R10(MG-H1)	1396.65			Low	1.02942	0							1
	DVDAAYMGRMDLHGK	1	1	1	Q5XKE5	M7(Oxidation); R9(MG-H1); M10(Oxidation)	1764.75			Low	0.97419	0							1
	DVDAAYMGRMDLHGK	1	1	1	Q5XKE5	Y6(Nitro); R9(MG-H1); M10(Oxidation)	1793.77			Low	0.957692	0							1
	ALGGFGFGSR	3	1	1	Q5XKE5		968.495			Low	0.955242	0	Low	1.01643	0	Low	0.763222	0	0
	MRSSVSRQTYSTKGGFSSNSASGGSGSQAR	1	1	1	Q5XKE5	R7(MG-H1); Y10(Nitro)	3124.41						Low	1.74928	0				3
	AEAEAWYQTK	2	2	1	Q5XKE5	Y7(Nitro); K10(Glycation)	1403.59						Low	0.809854	0	Low	0.540114	0	0
	DYQELMNVK	1	4	2	Q5XKE5;P35908	M6(Oxidation); K9(ONE)	1309.64									Low	0.944852	0	0
	NKYEDEINK	1	7	4	Q5XKE5;P02538;P13647;P04264	Y3(Nitro)	1197.55									Low	0.593431	0	1
P49862	Kallikrein-7 OS=Homo sapiens GN=KLK7 PE=1 SV=1 - [KLK7_HUMAN]	37.15	1	3	8	19	4.27369	34.78	7	7	4.05057	31.62	6	7	2.77185	18.97	4	5	253	27.5068	8.47021
	Sequence	# PSMs	# Proteins	# Protein Groups	Protein Group Accessions	Modifications	MH+ [Da]	q-Value	PEP	A2	XCorr A2	Probability A2	B2	XCorr B2	Probability B2	C2	XCorr C2	Probability C2	# Missed Cleavages
	DLLENSMLCAGIPDSK	3	1	1	P49862	C9(Carbamidomethyl)	1762.84	0.000923	0.0128206	Medium	2.06324	0	High	2.07187	0	High	2.77185	0	0
	IIDGAPCAR	4	1	1	P49862	C7(Carbamidomethyl)	972.492	0.0022	0.115074	High	2.21046	0	High	1.9787	0	High	1.54008	0	0
	HPGYSTQTHVNDLMLVK	3	1	1	P49862		1939.97	0.008465	0.101982	Medium	1.28041	0	High	1.52063	0	Low	1.09394	0	0
	LSSMVK	3	1	1	P49862	M4(Oxidation)	680.365	0.110614	0.710849	Low	0.504534	0	Low	0.962521	0	Low	0.748883	0	0
	WVLTAAHCKMNEYTVHLGSDTLGDRR	3	1	1	P49862	H7(ONE); C8(Carbamidomethyl); M10(Oxidation); R25(MG-H1); R26(MG-H1)	3308.57			Low	1.60733	0	Low	1.70512	0				2
	LSSMVKK	1	1	1	P49862	M4(Oxidation)	808.457			Low	0.971992	0							1
	FTKWINDTMKKHR	1	1	1	P49862	K3(Glycation); K11(Glycation); H12(HNE); R13(MG-H1)	2239.15			Low	0.877158	0							3
	HPGYSTQTHVNDLMLVKLNSQAR	1	1	1	P49862	H1(ONE); Y4(Nitro); M14(Oxidation)	2824.39						Low	1.46039	0				1
P49720	Proteasome subunit beta type-3 OS=Homo sapiens GN=PSMB3 PE=1 SV=2 - [PSB3_HUMAN]	37.07	1	3	5	13	16.3431	23.9	3	4	11.2731	32.68	4	5	10.249	19.51	3	4	205	22.9335	6.55127
	Sequence	# PSMs	# Proteins	# Protein Groups	Protein Group Accessions	Modifications	MH+ [Da]	q-Value	PEP	A2	XCorr A2	Probability A2	B2	XCorr B2	Probability B2	C2	XCorr C2	Probability C2	# Missed Cleavages
	LYIGLAGLATDVQTVAQR	2	1	1	P49720		1889.05	0	8.45457e-05	High	5.78494	0	High	5.30032	0				0
	DAVSGMGVIVHIIEK	5	1	1	P49720		1567.85	0	2.25547e-07	High	4.045	0	High	3.52389	0	High	3.98802	0	0
	FGPYYTEPVIAGLDPK	3	1	1	P49720		1766.9	0	0.0148496	High	2.4606	0	High	2.44887	0	High	2.64839	0	0
	QIKPYTLMSMVANLLYEK	2	1	1	P49720	Y5(Nitro); M10(Oxidation); Y16(Nitro); K18(ONE)	2402.19						Low	1.659	0				0
	FRLNLYELK	1	1	1	P49720	R2(MG-H1); Y6(Nitro); K9(ONE)	1448.78									Low	1.53793	0	1
Q0VFZ6	Coiled-coil domain-containing protein 173 OS=Homo sapiens GN=CCDC173 PE=2 SV=2 - [CC173_HUMAN]	36.41	1	1	25	57	7.57879	23.19	14	20	4.84805	10.87	8	15	13.4563	22.83	15	22	552	66.3614	8.86572
	Sequence	# PSMs	# Proteins	# Protein Groups	Protein Group Accessions	Modifications	MH+ [Da]	q-Value	PEP	A2	XCorr A2	Probability A2	B2	XCorr B2	Probability B2	C2	XCorr C2	Probability C2	# Missed Cleavages
	EKLDNEDMIIAR	9	1	1	Q0VFZ6	K2(HNE); R12(MG-H1)	1656.85	0.028293	0.358957	Medium	2.79642	0	Low	2.79626	0	Medium	2.58734	0	1
	QNALYEIEMRKK	4	1	1	Q0VFZ6	K12(HNE)	1678.92	0.484623	1				Low	1.0026	0	Low	0.896893	0	2
	EEMHESR	6	1	1	Q0VFZ6	M3(Oxidation); H4(ONE); R7(MG-H1)	1141.48	0.544716	1	Low	0.681399	0	Low	0.788293	0				0
	QGKRKK	2	1	1	Q0VFZ6	R4(MG-H1)	798.498	0.669611	1	Low	0.982515	0	Low	1.36126	0				3
	ADKEHQEVQDAHIQQMAK	3	1	1	Q0VFZ6	K3(HNE)	2262.12	0.745624	1	Low	2.29486	0				Low	2.00704	0	1
	KAKK	2	2	2	Q8N568;Q0VFZ6	K1(ONE); K3(Glycation); K4(ONE)	944.6	0.763545	1				Low	0.580805	0				2
	QNALYEIEMR	1	1	1	Q0VFZ6	Y5(Nitro)	1311.6	0.794052	1	Low	1.1495	0							0
	DEEIEAERQILDLEEEIYKQGK	1	1	1	Q0VFZ6	R8(MG-H1); Y18(Nitro); K19(ONE)	2930.4			Low	1.58348	0							2
	VMKERDAQIEFR	1	1	1	Q0VFZ6	M2(Oxidation); K3(Glycation); R12(MG-H1)	1753.85			Low	1.42445	0							2
	RFLEHMQDK	4	1	1	Q0VFZ6	K9(Glycation)	1365.64			Low	1.29637	0	Low	1.06549	0	Low	1.06232	0	1
	KYEEK	2	1	1	Q0VFZ6		696.356			Low	1.2215	0				Low	1.43548	0	1
	EEMHESRR	1	1	1	Q0VFZ6	M3(Oxidation); H4(ONE); R7(MG-H1); R8(MG-H1)	1351.58			Low	0.875934	0							1
	KYEEK	2	1	1	Q0VFZ6	Y2(Nitro)	741.345			Low	0.820369	0				Low	0.869309	0	1
	RCGRAK	1	1	1	Q0VFZ6	C2(Carbamidomethyl)	747.4			Low	0.666349	0							2
	HWTNTYAGMK	1	1	1	Q0VFZ6		1208.56			Low	0.625265	0							0
	KEMHLR	1	1	1	Q0VFZ6	M3(Oxidation)	829.441			Low	0.565014	0							1
	EREKDEK	1	1	1	Q0VFZ6	R2(MG-H1); K4(Glycation)	1149.52			Low	0.524954	0							2
	EEMHESR	2	1	1	Q0VFZ6	H4(ONE); R7(MG-H1)	1125.49			Low	0.503329	0				Low	0.63003	0	0
	LEKKREEMHESR	1	1	1	Q0VFZ6	H9(ONE)	1725.91						Low	1.65514	0				3
	EEMHESRR	2	1	1	Q0VFZ6	M3(Oxidation); H4(HNE); R7(MG-H1); R8(MG-H1)	1353.6						Low	0.552479	0	Low	0.569052	0	1
	KYEEKDAEEIKR	1	1	1	Q0VFZ6	K11(Glycation); R12(MG-H1)	1753.85									Low	1.93018	0	3
	NKFNAKQAKQAELDYCR	1	1	1	Q0VFZ6	K2(ONE); K9(ONE); C16(Carbamidomethyl)	2392.22									Low	1.68417	0	3
	EAACLRAERK	1	1	1	Q0VFZ6	C4(Carbamidomethyl); K10(HNE)	1359.74									Low	1.51729	0	2
	QIKEHEEEEERRK	2	1	1	Q0VFZ6	K3(HNE); R11(MG-H1); K13(Glycation)	2112.04									Low	1.17531	0	3
	LEAKKK	1	1	1	Q0VFZ6		716.47									Low	1.06556	0	2
	KREEMHESRR	1	1	1	Q0VFZ6	K1(Glycation); M5(Oxidation)	1535.71									Low	1.00289	0	3
	EEMHESR	1	1	1	Q0VFZ6	H4(ONE)	1071.49									Low	0.721594	0	0
	FLEHMQDK	1	1	1	Q0VFZ6	K8(Glycation)	1209.54									Low	0.622996	0	0
	EEEERQR	1	1	1	Q0VFZ6	R7(MG-H1)	1029.46									Low	0.487661	0	1
P49721	Proteasome subunit beta type-2 OS=Homo sapiens GN=PSMB2 PE=1 SV=1 - [PSB2_HUMAN]	35.82	1	1	5	7	3.04113	10.45	2	2	2.00834	21.89	2	2	2.05811	29.35	3	3	201	22.8217	7.02002
	Sequence	# PSMs	# Proteins	# Protein Groups	Protein Group Accessions	Modifications	MH+ [Da]	q-Value	PEP	A2	XCorr A2	Probability A2	B2	XCorr B2	Probability B2	C2	XCorr C2	Probability C2	# Missed Cleavages
	FILNLPTFSVR	2	1	1	P49721		1306.75	0	0.0267235	High	3.04113	0	High	2.00834	0				0
	YYTPTISR	1	1	1	P49721		1000.51	0.103549	0.707415							Low	1.08729	0	0
	YYTPTISRER	1	1	1	P49721	Y1(Nitro); Y2(Nitro)	1375.62			Low	0.84454	0							1
	MSEKILLLCVGEAGDTVQFAEYIQKNVQLYKMR	2	1	1	P49721	M1(Oxidation); C9(Carbamidomethyl); Y30(Nitro); K31(HNE)	4092.07						Low	1.92453	0	Low	2.05811	0	3
	VAASNIVQMKDDHDKMFKMSEK	1	1	1	P49721	K15(Glycation); K18(Glycation); M19(Oxidation); K22(Glycation)	3054.4									Low	1.54612	0	3
Q9BYJ1	Hydroperoxide isomerase ALOXE3 OS=Homo sapiens GN=ALOXE3 PE=1 SV=1 - [LOXE3_HUMAN]	35.44	2	14	22	55	42.3275	31.36	17	20	25.7129	24.75	16	18	31.1186	27.71	16	17	711	80.4913	6.96143
	Sequence	# PSMs	# Proteins	# Protein Groups	Protein Group Accessions	Modifications	MH+ [Da]	q-Value	PEP	A2	XCorr A2	Probability A2	B2	XCorr B2	Probability B2	C2	XCorr C2	Probability C2	# Missed Cleavages
	ATLLNPEGLVDQVTSIGR	5	1	1	Q9BYJ1		1883.02	0	8.75037e-12	High	5.13654	0	High	4.66369	0	High	5.25256	0	0
	TYLDTLPEVNISCNNLLLFWLVSQEPK	4	1	1	Q9BYJ1	C13(Carbamidomethyl)	3206.64	0	1.13062e-08	High	5.03326	0	High	4.28698	0	High	5.62568	0	0
	AGTLDNISVTLVGTCGESPK	1	1	1	Q9BYJ1	C15(Carbamidomethyl)	2019.01	0	0.00237696	High	3.55423	0							0
	NQGLALPYTYLDPPLIENSVSI	3	1	1	Q9BYJ1		2417.26	0	0.0451325	High	3.48869	0	High	3.39299	0	High	3.64204	0	0
	CTAELGELLLLR	3	1	1	Q9BYJ1	C1(Carbamidomethyl)	1387.76	0	3.48053e-05	High	3.44627	0	High	3.53233	0	High	3.14629	0	0
	TICQDSLPLLLDHR	4	1	1	Q9BYJ1	C3(Carbamidomethyl)	1680.87	0	0.0201355	High	2.98117	0	High	1.46414	0	Low	1.26226	0	0
	DQRPLGTYPDEHFTEEAPR	2	1	1	Q9BYJ1		2258.04	0	5.15023e-09	High	2.4374	0				High	3.92039	0	0
	LCVTTGPYLR	4	1	1	Q9BYJ1	C2(Carbamidomethyl)	1179.62	0	0.000424707	High	1.61627	0	High	2.15183	0	Medium	1.15306	0	0
	YTLQVNTIAR	3	1	1	Q9BYJ1		1178.65	0	0.000210363	Medium	0.697496	0	High	3.28641	0	Medium	0.924373	0	0
	SIAAFQSR	3	1	1	Q9BYJ1		879.468	0.000475	0.00581085	High	2.4355	0	High	2.2854	0	High	2.72949	0	0
	LAQISR	3	2	1	Q9BYJ1		687.415	0.002923	0.149408	High	1.79702	0	Medium	2.11331	0	High	1.70173	0	0
	ESSGFPSR	3	1	1	Q9BYJ1		866.4	0.005686	0.0913359	Low	1.27189	0	Medium	1.23962	0	High	1.54655	0	0
	YAFFR	3	1	1	Q9BYJ1		703.356	0.019778	0.268701	Medium	1.03767	0	Medium	1.04471	0	Medium	1.15556	0	0
	GVLAIPNYHYR	3	1	1	Q9BYJ1		1302.7	0.019805	0.302903	Medium	1.62533	0	Low	1.59747	0	Medium	1.7185	0	0
	LCTPGEMVK	2	1	1	Q9BYJ1	C2(Carbamidomethyl); M7(Oxidation); K9(ONE)	1204.6			Low	1.32209	0	Low	1.36755	0				0
	MGRDFAPGSVQKYK	3	1	1	Q9BYJ1	R3(MG-H1); Y13(Nitro); K14(HNE)	1838.92			Low	1.23713	0	Low	1.35716	0				2
	QLPLCHPIYK	1	1	1	Q9BYJ1	C5(Carbamidomethyl)	1268.68			Low	1.19323	0							0
	ARGVLAIPNYHYR	1	1	1	Q9BYJ1	Y10(Nitro); Y12(Nitro)	1619.82						Low	1.33882	0				1
	DFAPGSVQKYK	1	1	1	Q9BYJ1	Y10(Nitro)	1284.62						Low	0.740223	0				1
	VHKERYAFFRK	1	1	1	Q9BYJ1	K3(HNE); R5(MG-H1); R10(MG-H1)	1744.95									Low	0.829529	0	3
	KDSWYCSR	1	1	1	Q9BYJ1	Y5(Nitro); C6(Carbamidomethyl)	1146.47									Low	0.562192	0	1
	TTTCVDQGDSSGNR	1	1	1	Q9BYJ1	C4(Carbamidomethyl); R14(MG-H1)	1551.64									Low	0.534963	0	0
Q8NA56	Tetratricopeptide repeat protein 29 OS=Homo sapiens GN=TTC29 PE=2 SV=2 - [TTC29_HUMAN]	34.74	1	1	13	42	10.5418	29.47	10	19	2.89043	8.63	4	7	7.40762	26.53	7	16	475	55.0465	5.70654
	Sequence	# PSMs	# Proteins	# Protein Groups	Protein Group Accessions	Modifications	MH+ [Da]	q-Value	PEP	A2	XCorr A2	Probability A2	B2	XCorr B2	Probability B2	C2	XCorr C2	Probability C2	# Missed Cleavages
	AEDAERK	4	1	1	Q8NA56		818.4	0.043627	0.418132	Low	1.89992	0	Low	1.34797	0	Low	1.51333	0	1
	SQLIKEKDDIDHYLEVNFKGLSK	15	1	1	Q8NA56	H12(HNE); Y13(Nitro); K23(ONE)	3074.61	0.791037	1	Low	2.34261	0	Low	1.99111	0	Low	2.45388	0	3
	EGSDKKMEAEASYYLGLAHLAAEEYETALTVLDTYCK	6	1	1	Q8NA56	K6(HNE); Y13(Nitro); H19(HNE); C36(Carbamidomethyl)	4527.2			Low	2.21949	0				Low	2.63356	0	2
	GLSKEEVAAYR	1	1	1	Q8NA56	K4(Glycation); Y10(Nitro)	1429.68			Low	1.44194	0							1
	ASTMLGDIYNEKGYYNK	1	1	1	Q8NA56	Y9(Nitro); K12(HNE); Y14(Nitro); Y15(Nitro)	2257.98			Low	1.23005	0							1
	QKLPCSSR	1	1	1	Q8NA56	K2(ONE); C5(Carbamidomethyl)	1129.6			Low	1.21325	0							1
	MLENK	4	1	1	Q8NA56	M1(Oxidation); K5(Glycation)	812.371			Low	1.14866	0	Low	0.996893	0				0
	EYKQAIK	1	1	1	Q8NA56	K3(ONE); K7(ONE)	1187.7			Low	0.949908	0							1
	IDCGKK	3	1	1	Q8NA56	C3(Carbamidomethyl); K5(ONE)	874.463			Low	0.944625	0	Low	0.933745	0	Low	1.24996	0	1
	ESFEDVHNNLYALACYFNNSEDK	1	1	1	Q8NA56	Y11(Nitro); C15(Carbamidomethyl); Y16(Nitro)	2869.14			Low	0.88146	0							0
	SQLIKEKDDIDHYLEVNFKGLSK	1	1	1	Q8NA56	H12(ONE); K23(Glycation)	3035.6						Low	2.89043	0				3
	VRSLFWLQKPLEEQPDK	1	1	1	Q8NA56	K17(Glycation)	2275.21									Low	1.79667	0	1
	TYRLLSDKMLENK	1	1	1	Q8NA56	R3(MG-H1)	1664.86									Low	1.56793	0	2
	AEDAERKESFEDVHNNLYALACYFNNSEDK	2	1	1	Q8NA56	C22(Carbamidomethyl); Y23(Nitro)	3623.53									Low	1.55737	0	2
P04792	Heat shock protein beta-1 OS=Homo sapiens GN=HSPB1 PE=1 SV=2 - [HSPB1_HUMAN]	33.66	1	1	5	9	0	19.02	3	4	0	20.49	3	3	1.94571	13.66	2	2	205	22.7685	6.40479
	Sequence	# PSMs	# Proteins	# Protein Groups	Protein Group Accessions	Modifications	MH+ [Da]	q-Value	PEP	A2	XCorr A2	Probability A2	B2	XCorr B2	Probability B2	C2	XCorr C2	Probability C2	# Missed Cleavages
	LFDQAFGLPR	4	1	1	P04792		1163.62	0	0.0012371	Medium	1.48646	0	High	1.23246	0	High	1.94571	0	0
	HEERQDEHGYISRCFTRK	2	1	1	P04792	H1(ONE); R4(MG-H1); C14(Carbamidomethyl); R17(MG-H1)	2610.23	0.752906	1	Low	1.65425	0				Low	1.40507	0	3
	TKDGVVEITGKHEER	1	1	1	P04792	K2(ONE); R15(MG-H1)	1906.01			Low	1.10308	0							2
	HTADRWRVSLDVNHFAPDELTVKTK	1	1	1	P04792	R7(MG-H1); K23(Glycation)	3151.57						Low	1.77703	0				3
	DWYPHSR	1	1	1	P04792	Y3(Nitro)	1005.41						Low	0.434333	0				0
Q5T7P3	Late cornified envelope protein 1B OS=Homo sapiens GN=LCE1B PE=1 SV=1 - [LCE1B_HUMAN]	33.05	2	1	2	12	7.70744	33.05	2	3	20.056	33.05	2	6	9.99212	33.05	2	3	118	11.6177	8.36768
	Sequence	# PSMs	# Proteins	# Protein Groups	Protein Group Accessions	Modifications	MH+ [Da]	q-Value	PEP	A2	XCorr A2	Probability A2	B2	XCorr B2	Probability B2	C2	XCorr C2	Probability C2	# Missed Cleavages
[truncated: 4,119 more rows]
